# Supplementary material for: Ru(ii)-Catalyzed C–H bond activation/annulation of N-iminopyridinium ylides with sulfoxonium ylides
Source: Royal Society of Chemistry journal article supplement (doi:10.1039/d1ob02427b), 2022-01-01

## *Supporting Information*

### **Ru(II)-Catalyzed C-H Bond Activation/Annulation of N-iminopyridinium Ylides with Sulfoxonium Ylides**

Xiang Li,<sup>\*a,b</sup> Danlu Li<sup>a</sup> and Xiaofei Zhang<sup>\*a,b</sup>

a. College of Chemistry and Chemistry Engineering, Shaanxi Key Laboratory of Chemistry Additives for Industry, Shaanxi

University of Science & Technology, Xi'an 710021, China. E-mail: lix@sust.edu.cn; zhangxiaofei@sust.edu.cn

b. Shaanxi Key Laboratory of Chemical Additives for Industry, Shaanxi University of Science and Technology, Xi'an,

Shaanxi 710021, China

## List of Contents

|                                                                                |     |
|--------------------------------------------------------------------------------|-----|
| I. General Information. ....                                                   | S3  |
| II. General procedure for preparation of <b>3</b> .....                        | S4  |
| III. Synthesis of <b>thunberginol A</b> and derivatization of <b>3aa</b> ..... | S4  |
| IV. Mechanistic Studies .....                                                  | S5  |
| V. Characterization data for products .....                                    | S9  |
| VI. References.....                                                            | S25 |
| VII. <sup>1</sup> H NMR and <sup>13</sup> C NMR Spectra of New Compound.....   | S26 |

## I. General Information.

All reagents and all solvents were used directly as obtained commercially unless otherwise noted.  $^1\text{H}$  NMR and  $^{13}\text{C}$  NMR spectra were recorded at 25 °C on a JEOL 400 MHz and 100 MHz NMR spectrometers or Bruker 600 MHz and 150 MHz NMR spectrometers. For  $^1\text{H}$  NMR, tetramethylsilane (TMS) served as internal standard ( $\delta=0$ ) and data are reported as follows: chemical shift, integration, multiplicity (s = singlet, d = doublet, t = triplet, q = quartet, m = multiplet), and coupling constant(s) in Hz. For  $^{13}\text{C}$  NMR, TMS ( $\delta=0$ ) was used as internal standard and spectra were obtained with complete proton decoupling. HPLC/MS analysis was carried out with gradient elution (5%  $\text{CH}_3\text{CN}$  to 100%  $\text{CH}_3\text{CN}$ ) on a Q-Exactive Orbitrap MS (Thermo, MA, USA) mass spectrometer. (also used to produce high resolution mass spectra).

*N*-iminopyridinium ylides,<sup>1</sup> and sulfoxonium ylides<sup>2</sup>, were prepared according to the reported literatures.

## II. General procedure for preparation of 3

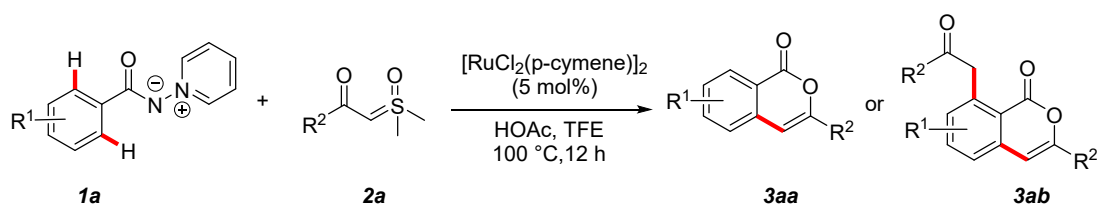

**Representative Synthesis of Product 3:** A glass bottle was charged with **1a** (39.6 mg, 0.2 mmol), **2a** (78.4 mg, 0.4 mmol),  $[\text{RuCl}_2(p\text{-cymene})]_2$  (6.1 mg, 5 mol %),  $\text{CH}_3\text{COOH}$  (24 mg, 0.4 mmol), and TFE (2.0 mL). The reaction mixture was stirred at 100 °C for 12 h. After the reaction was completed as indicated by TLC analysis, the solvent was removed under reduced pressure and the residue was purified by silica gel chromatography using petroleum ether/ethyl acetate 20:1 (v/v) to give the corresponding product **3aa** (39.2 mg, 88%).

## III. Synthesis of thunberginol A and derivatization of 3aa

Synthesis of thunberginol A

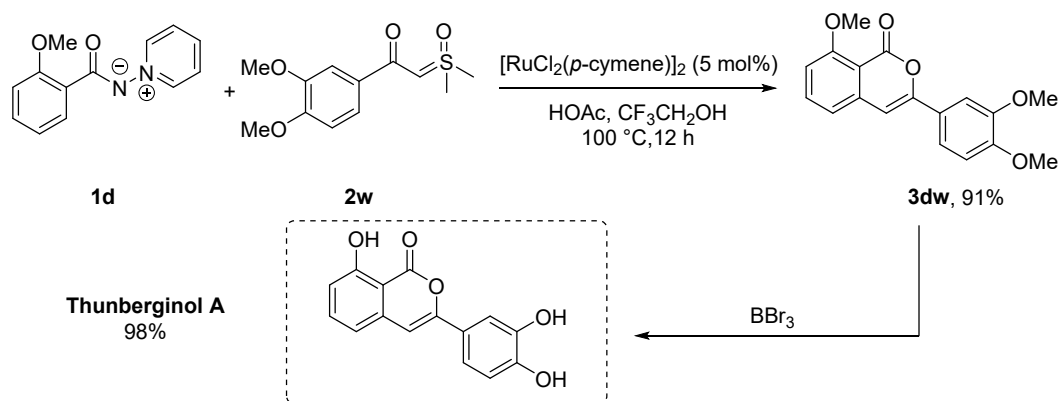

A glass bottle was charged with **1d** (45.6 mg, 0.2 mmol), **2w** (102 mg, 0.4 mmol),  $[\text{RuCl}_2(p\text{-cymene})]_2$  (6.2 mg, 5 mol %),  $\text{CH}_3\text{COOH}$  (24.0 mg, 0.4 mmol), and TFE (2.0 mL). The reaction mixture was stirred at 100 °C for 12 h, then the solvent was removed and the residue was purified by silica gel chromatography using dichloromethane/methanol 20:1 (v/v) to give **3dw** (57 mg, 91%). Then, the mixture of **3dw** (35.0 mg, 1.12 mmol) and a 1M dichloromethane solution of  $\text{BBr}_3$  (5.2 eq, 5.83

mmol) was stirred at room temperature under nitrogen for 2 hours. The solution was then poured into ice water (10 mL) and the mixture extracted with ethyl acetate (6 × 15 mL). The organic extract was washed with brine (10 mL), dried over magnesium sulphate and reduced in vacuo. The product was purified via flash column chromatography (30:1 Dichloromethane / methanol) to yield the natural product (30.1 mg, 98%) as a pale orange solid.

#### Alkenylation of **3aa**

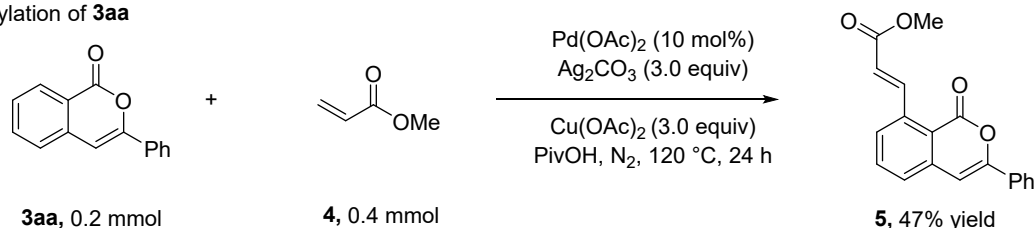

A Schlenk tube was charged with **3aa** (44.6 mg, 0.2 mmol), Pd(OAc)<sub>2</sub> (4.5 mg, 10 mol %), Cu(OAc)<sub>2</sub> (119.8 mg, 3 eq) and Ag<sub>2</sub>CO<sub>3</sub> (165.4 mg, 3 eq) were combined in PivOH (2 ml) under N<sub>2</sub>. The alkene **4** (34.4 mg, 0.4 mmol) was added slowly and the reaction mixture was heated to 120 °C. The reaction mixture was diluted with CH<sub>2</sub>Cl<sub>2</sub> and the excess NaHCO<sub>3</sub> was added to neutralize PivOH. After stirring the mixture for 10 min, the residue was washed with sequentially aqueous NaHCO<sub>3</sub> and NH<sub>4</sub>Cl. The organic layer was dried over MgSO<sub>4</sub>. Then the solvent was removed and the residue was purified by silica gel chromatography using dichloromethane/methanol 50:1 (v/v) to give **5** (60.4 mg, 47%).

## V. Mechanistic Studies

### (a) Deuterium Experiments

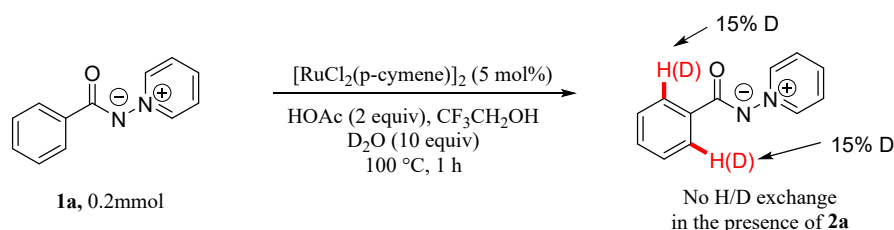

A glass bottle was charged with **1a** (39.6 mg, 0.2 mmol), [RuCl<sub>2</sub>(*p*-cymene)]<sub>2</sub> (6.1 mg, 5 mol %), CH<sub>3</sub>COOH (24.0 mg, 0.4 mmol), D<sub>2</sub>O (32.0 mg, 2mmol) and TFE (2.0 mL). The reaction mixture

was stirred at 100 °C for 1 h, then the solvent was removed and the residue was purified by silica gel chromatography using petroleum ether/ethyl acetate 20:1 (v/v) to give *d*-**1a** (13 mg). The extent of deuteration was determined on the basis of <sup>1</sup>H NMR analysis.

#### H/D Experiment in the absence of **2a**

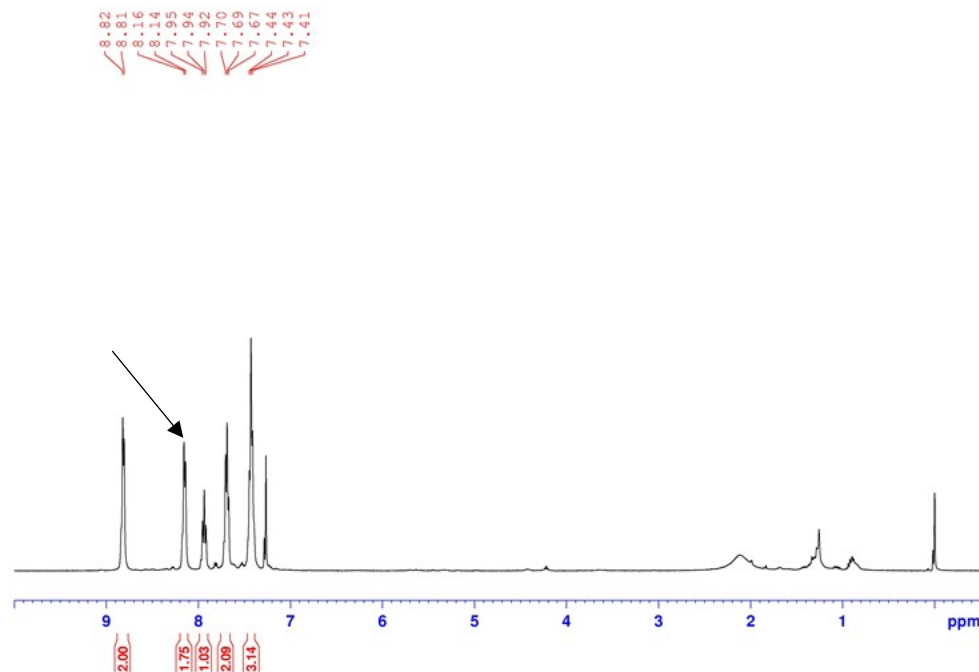

#### (b) Kinetic isotope effect KIE

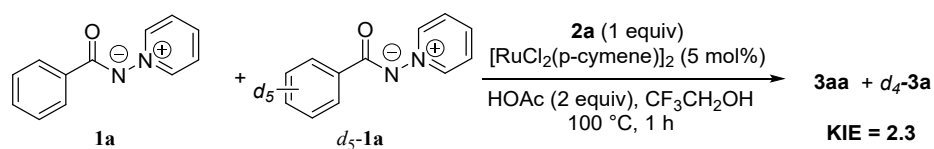

A glass bottle was charged with **1a** (39.6 mg, 0.2 mmol), **2a** (78.4 mg, 0.4 mmol), [RuCl<sub>2</sub>(*p*-cymene)]<sub>2</sub> (6.1 mg, 5 mol %), CH<sub>3</sub>COOH (24 mg, 0.4 mmol), and TFE (2.0 mL). The reaction mixture was stirred at 100 °C for 12 h. After the reaction was completed as indicated by TLC analysis, the solvent was removed under reduced pressure and the residue was purified by silica gel chromatography using petroleum ether/ethyl acetate 20:1 (v/v) to give the corresponding product **3aa** (39.2 mg, 88%).

**KIE = 2.3**

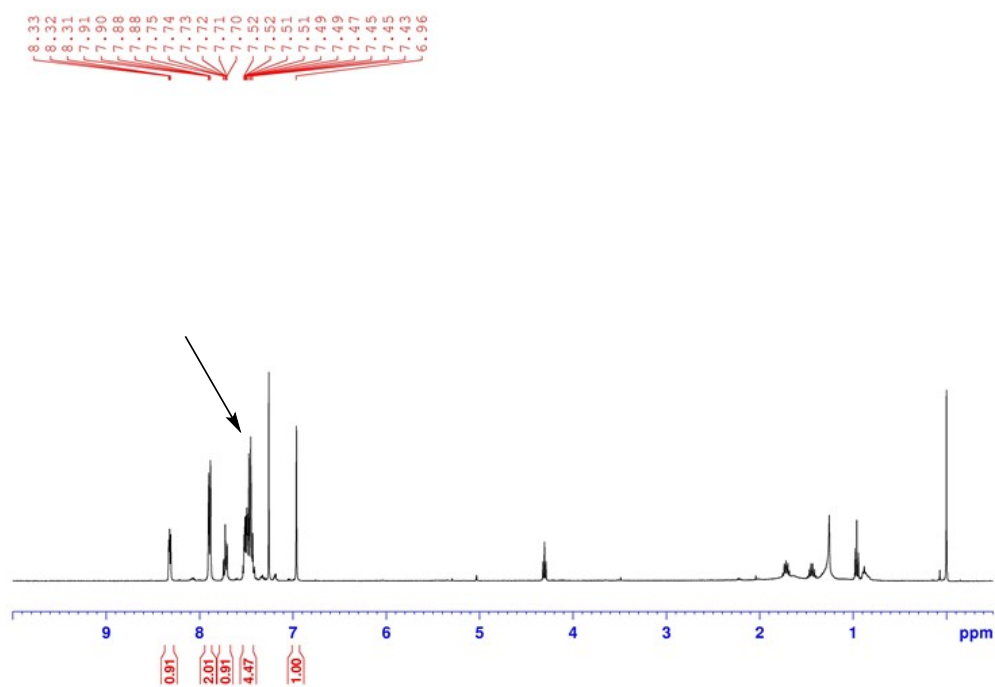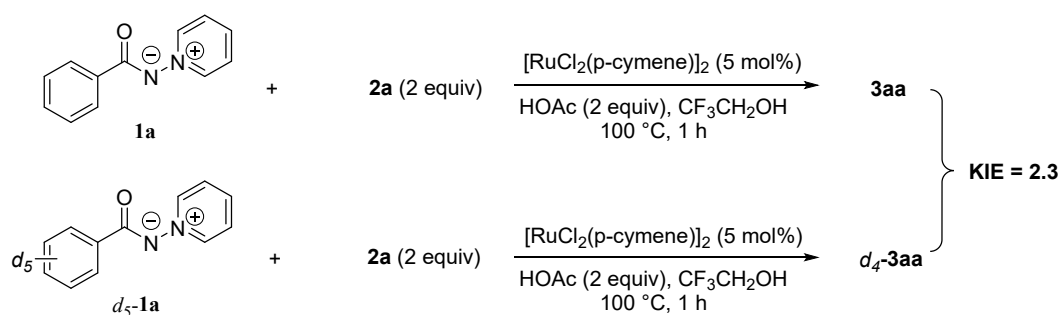

A glass bottle was charged with **1a** (19.8 mg, 0.1 mmol), **2a** (39.2 mg, 0.2 mmol),  $[\text{RuCl}_2(p\text{-cymene})]_2$  (3.1 mg, 5 mol %),  $\text{CH}_3\text{COOH}$  (12.0 mg, 0.2 mmol), and TFE (1.0 mL). The reaction mixture was stirred at 100 °C for 1 h. And to another bottle was added  $d_5\text{-1a}$  (19.3 mg, 0.1 mmol), **2a** (39.2 mg, 0.2 mmol),  $[\text{Cp}^*\text{Rh}(\text{Cl})_2]_2$  (3.1 mg, 5 mol %),  $\text{CH}_3\text{COOH}$  (12.0 mg, 0.2 mmol), and TFE (1.0 mL). The reaction mixture was stirred at 100 °C for 1 h. After the completion of the reaction, the two reactions were combined, then the solvent was removed and the residue was purified by silica gel chromatography using petroleum ether/ethyl acetate 20:1 (v/v) to obtain **3aa** and  $d_4\text{-3aa}$  (30mg). KIE value ( $k_H/k_D = 2.3$ ) was determined on the basis of  $^1\text{H}$  NMR analysis.

**KIE = 2.3**

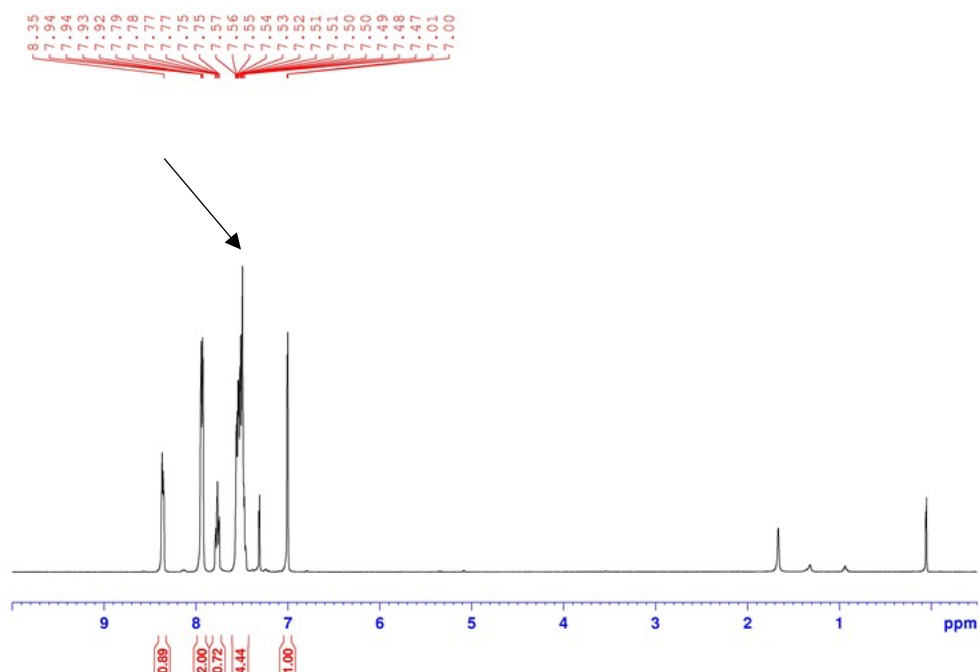

**(c) Competitive experiment:**

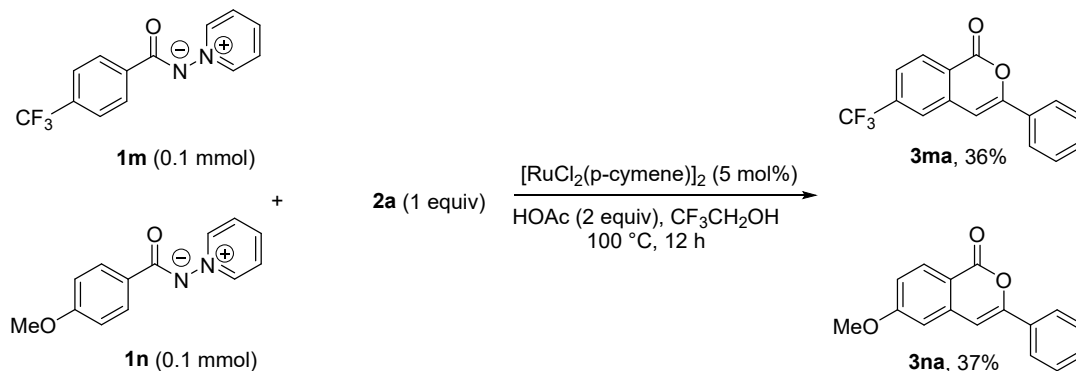

A glass bottle was charged with **1m** (26.6 mg, 0.1 mmol), **1n** (22.8 mg, 0.1 mmol), **2a** (19.6 mg, 0.1 mmol),  $[\text{RuCl}_2(\text{p-cymene})]_2$  (3.1 mg, 5 mol %),  $\text{CH}_3\text{COOH}$  (12.0 mg, 0.2 mmol), and TFE (1.0 mL). The reaction mixture was stirred at 100 °C for 12 h, then the solvent was removed and the residue was purified by silica gel chromatography using petroleum ether/ethyl acetate 20:1 (v/v) to give **3ma** (20.9 mg) and **3na** (18.8 mg) in 36% and 37% yield, respectively.

**(d) Control experiment:**

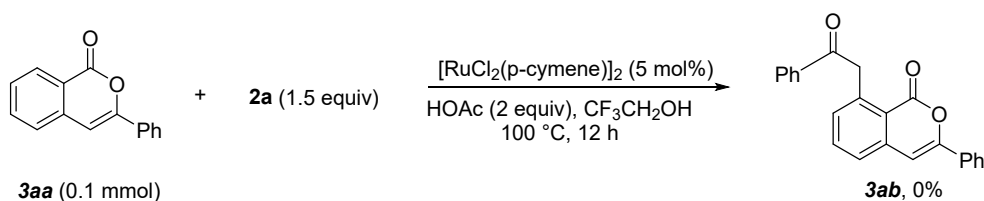

A glass bottle was charged with **3aa** (22.3 mg, 0.1 mmol), **2a** (29.4 mg, 0.15 mmol),  $[\text{RuCl}_2(\text{p-S8})]$



cymene)]<sub>2</sub> (3.1 mg, 5 mol %), CH<sub>3</sub>COOH (12.0 mg, 0.2 mmol), and TFE (1.0 mL). The reaction mixture was stirred at 100 °C for 12 h. The formation of **3ab** was not observed by TLC, and **3aa** was fully recovered.

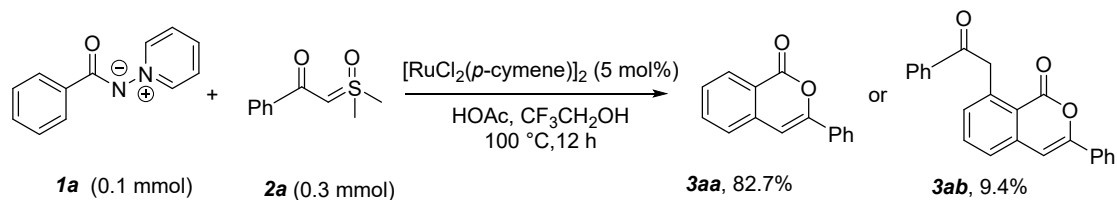

A glass bottle was charged with **1a** (19.8 mg, 0.1 mmol), **2a** (29.4 mg, 0.3 mmol), [RuCl<sub>2</sub>(*p*-cymene)]<sub>2</sub> (3.1 mg, 5 mol %), CH<sub>3</sub>COOH (12.0 mg, 0.2 mmol), and TFE (1.0 mL). The reaction mixture was stirred at 100 °C for 24 h, then the solvent was removed and the residue was purified by silica gel chromatography using petroleum ether/ethyl acetate 20:1 (v/v) to give **3aa** (38.4 mg) and **3ab** (6.4 mg) in 83% and 9% yield, respectively. There was no significant increase in **3ab**.

## V. Characterization data for products

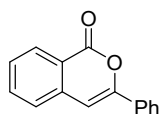

**3-phenyl-1H-isochromen-1-one (3aa)**: white solid (39.2 mg, 88%). (This compound is known.<sup>3</sup>)

<sup>1</sup>H NMR (400 MHz, CDCl<sub>3</sub>) δ 8.28 (d, *J* = 7.9 Hz, 1H), 7.86 (d, *J* = 7.1 Hz, 2H), 7.71 – 7.67 (m, 1H), 7.48 – 7.42 (m, 5H), 6.92 (s, 1H). <sup>13</sup>C NMR (101 MHz, CDCl<sub>3</sub>) δ 162.3, 153.6, 137.5, 134.9, 131.9, 130.0, 129.6, 128.8, 128.1, 126.0, 125.2, 120.5, 101.8.

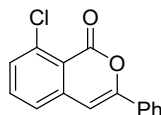

**8-chloro-3-phenyl-1H-isochromen-1-one (3ba)**: white solid (41 mg, 80%). (This compound is known.<sup>3</sup>)

<sup>1</sup>H NMR (400 MHz, CDCl<sub>3</sub>) δ 7.87 – 7.85 (m, 2H), 7.55 (t, *J* = 7.8 Hz, 1H), 7.49 – 7.45 (m, 4H), 7.37 (d, *J* = 7.6 Hz, 1H), 6.87 (s, 1H). <sup>13</sup>C NMR (101 MHz, CDCl<sub>3</sub>) δ 158.7, 154.3, 140.6, 137.2, 134.5, 131.4, 130.9, 130.3, 128.9, 125.3, 124.9, 117.6, 101.5.

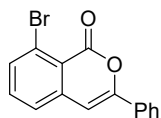

**8-bromo-3-phenyl-1H-isochromen-1-one (3ca):** white solid (26.8mg, 44%). <sup>1</sup>H NMR (400 MHz, CDCl<sub>3</sub>) δ 7.86 (d, *J* = 6.3 Hz, 2H), 7.73 (d, *J* = 7.4 Hz, 1H), 7.44 (d, *J* = 8.4 Hz, 5H), 6.89 (s, 1H). <sup>13</sup>C NMR (101 MHz, CDCl<sub>3</sub>) δ 159.0, 154.0, 140.6, 134.7, 134.6, 131.3, 130.3, 128.9, 125.7, 125.3, 125.0, 118.8, 101.6. HRMS (ESI-TOF) (*m/z*): Calcd for C<sub>15</sub>H<sub>9</sub>BrNaO<sub>2</sub><sup>+</sup> ([M+Na]<sup>+</sup>) 322.9678, found 322.9675.

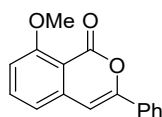

**8-methoxy-3-phenyl-1H-isochromen-1-one (3da):** white solid (34.4 mg, 68%). (This compound is known.<sup>4</sup>) <sup>1</sup>H NMR (400 MHz, CDCl<sub>3</sub>) δ 7.92 (d, *J* = 6.8 Hz, 2H), 7.66 (t, *J* = 8.0 Hz, 1H), 7.50 – 7.45 (m, 3H), 7.07 (d, *J* = 7.7 Hz, 1H), 6.98 (d, *J* = 8.3 Hz, 1H), 4.06 (s, 3H). <sup>13</sup>C NMR (101 MHz, CDCl<sub>3</sub>) δ 161.7, 159.0, 154.0, 140.5, 135.8, 131.9, 130.0, 128.8, 125.3, 118.1, 109.9, 109.3, 101.8, 56.3.

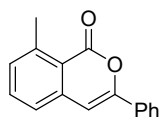

**8-methyl-3-phenyl-1H-isochromen-1-one (3ea):** white solid (26.2 mg, 55%). (This compound is known.<sup>5</sup>) <sup>1</sup>H NMR (400 MHz, CDCl<sub>3</sub>) δ 7.88 (d, *J* = 7.2 Hz, 2H), 7.55 (t, *J* = 7.5 Hz, 1H), 7.48 – 7.42 (m, 3H), 7.33 – 7.29 (m, 2H), 6.89 (s, 1H), 2.86 (s, 3H). <sup>13</sup>C NMR (150 MHz, CDCl<sub>3</sub>) δ 161.7, 153.2, 143.6, 139.1, 134.0, 132.0, 131.1, 129.8, 128.8, 125.2, 124.2, 119.0, 102.3, 23.2.

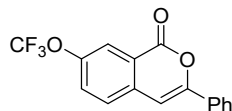

**3-phenyl-7-(trifluoromethoxy)-1H-isochromen-1-one (3fa):** white solid (53.4 mg, 87%). <sup>1</sup>H NMR (400 MHz, CDCl<sub>3</sub>) δ 8.15 (s, 1H), 7.89 – 7.86 (m, 2H), 7.56 (s, 2H), 7.48 – 7.45 (m, 3H), 6.96 (s, 1H). <sup>13</sup>C NMR (101 MHz, CDCl<sub>3</sub>) δ 161.2, 154.2, 148.4, 136.1, 131.5, 130.3, 128.9, 128.1, 127.9, 125.3, 121.7, 121.1, 119.1, 100.8. HRMS (ESI-TOF) (*m/z*): Calcd for C<sub>16</sub>H<sub>9</sub>F<sub>3</sub>NaO<sub>3</sub><sup>+</sup> ([M+Na]<sup>+</sup>) 329.0396, found 329.0391.

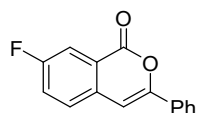

**7-fluoro-3-phenyl-1H-isochromen-1-one (3ga):** light yellow solid (28.2 mg, 59%). (This compound is known.<sup>6</sup>) <sup>1</sup>H NMR (400 MHz, CDCl<sub>3</sub>) δ 8.11 – 8.10 (m, 1H), 7.90 (d, *J* = 6.7 Hz, 1H), 7.47 – 7.42 (m, 5H), 7.16 (d, *J* = 1.1 Hz, 1H). <sup>13</sup>C NMR (101 MHz, CDCl<sub>3</sub>) δ 161.0, 157.3(d, *J* = 253.3 Hz), 154.3, 131.7, 130.3, 128.9, 128.4 (d, *J* = 7.7 Hz), 126.7 (d, *J* = 16.8 Hz), 125.4, 125.3(d, *J* = 4.2 Hz), 121.9 (d, *J* = 3.9 Hz), 120.2 (d, *J* = 19.8 Hz), 94.2 (d, *J* = 4.8 Hz).

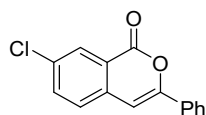

**7-chloro-3-phenyl-1H-isochromen-1-one (3ha):** light yellow solid (20.0 mg, 39%). (This compound is known.<sup>9</sup>) <sup>1</sup>H NMR (400 MHz, CDCl<sub>3</sub>) δ 8.23 (d, *J* = 7.8 Hz, 1H), 7.92 (d, *J* = 6.6 Hz, 2H), 7.76 (d, *J* = 7.7 Hz, 1H), 7.48 (d, *J* = 6.2 Hz, 3H), 7.43 – 7.39 (m, 1H), 7.31(s, 1H). <sup>13</sup>C NMR (101 MHz, CDCl<sub>3</sub>) δ 161.5, 154.6, 135.6, 135.1, 131.7, 130.6, 130.5, 128.9, 128.5, 128.2, 125.6, 122.0, 98.0.

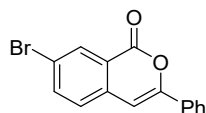

**7-bromo-3-phenyl-1H-isochromen-1-one (3ia):** white solid (16.2 mg, 27%). (This compound is known.<sup>5</sup>) <sup>1</sup>H NMR (400 MHz, CDCl<sub>3</sub>) δ 8.28 (d, *J* = 7.9 Hz, 1H), 7.93 (t, *J* = 7.6 Hz, 3H), 7.48 (d, *J* = 6.8 Hz, 3H), 7.35 (t, *J* = 7.9 Hz, 1H), 7.30 (s, 1H). <sup>13</sup>C NMR (101 MHz, CDCl<sub>3</sub>) δ 161.5, 154.7, 138.6, 137.0, 131.7, 130.4, 129.2, 128.9, 128.6, 125.6, 122.1, 120.7, 100.5.

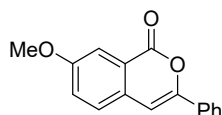

**7-methoxy-3-phenyl-1H-isochromen-1-one (3ja):** white solid (20.4 mg, 40%). (This compound is known.<sup>6</sup>) <sup>1</sup>H NMR (400 MHz, CDCl<sub>3</sub>) δ 7.86 (d, *J* = 7.6 Hz, 2H), 7.73 (s, 1H), 7.47 – 7.38 (m, 4H), 7.31 (d, *J* = 8.4 Hz, 1H), 6.93 (s, 1H), 3.92 (s, 3H). <sup>13</sup>C NMR (101 MHz, CDCl<sub>3</sub>) δ 162.5, 159.6, 151.7, 132.1, 131.2, 129.6, 128.8, 127.6, 124.9, 124.7, 121.7, 110.0, 101.6, 55.8.

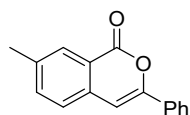

**7-methyl-3-phenyl-1H-isochromen-1-one (3ka):** white solid (44.8 mg, 95%). (This compound is known.<sup>3</sup>) <sup>1</sup>H NMR (400 MHz, CDCl<sub>3</sub>) δ 8.12 (s, 1H), 7.87 (d, *J* = 6.7 Hz, 2H), 7.53 (d, *J* = 7.7 Hz, 1H), 7.45 – 7.39 (m, 4H), 6.93 (s, 1H), 2.47 (s, 3H). <sup>13</sup>C NMR (101 MHz, CDCl<sub>3</sub>) δ 162.5, 152.8, 138.5, 136.2, 135.0, 132.1, 129.7, 129.4, 128.8, 125.9, 125.1, 120.4, 101.8, 21.4.

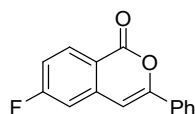

**6-fluoro-3-phenyl-1H-isochromen-1-one (3la):** white solid (39.4 mg, 82%). (This compound is known.<sup>3</sup>) <sup>1</sup>H NMR (400 MHz, CDCl<sub>3</sub>) δ 8.34 – 8.31 (m, 1H), 7.87 (d, *J* = 5.1 Hz, 2H), 7.46 (s, 3H), 7.20 – 7.13 (m, 2H), 6.91 (s, 1H). <sup>13</sup>C NMR (101 MHz, CDCl<sub>3</sub>) δ 168.0, 165.5, 161.4, 154.9, 140.2 (d, *J* = 10.8 Hz), 133.0 (d, *J* = 10.5 Hz), 131.6, 130.4, 128.9, 125.4, 117.0, 116.5 (d, *J* = 23.4 Hz), 111.5 (d, *J* = 22.7 Hz) 101.2.

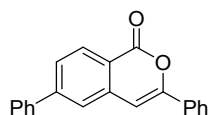

**3,6-diphenyl-1H-isochromen-1-one (3ma):** yellow solid (54.2 mg, 91%). (This compound is known.<sup>3</sup>) <sup>1</sup>H NMR (400 MHz, CDCl<sub>3</sub>) δ 8.35 (d, *J* = 8.1 Hz, 1H), 7.89 (d, *J* = 6.9 Hz, 2H), 7.71 – 7.66 (m, 4H), 7.52 – 7.45 (m, 6H), 7.00 (s, 1H). <sup>13</sup>C NMR (150 MHz, CDCl<sub>3</sub>) δ 162.3, 154.0, 147.7, 139.5, 138.0, 130.3, 130.0, 129.1, 128.9, 128.7, 127.4, 127.2, 125.3, 124.2, 119.3, 102.0

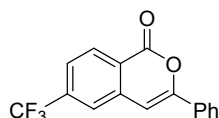

**3-phenyl-6-(trifluoromethyl)-1H-isochromen-1-one (3na):** white solid (41.8 mg, 72%). (This compound is known.<sup>3</sup>) <sup>1</sup>H NMR (400 MHz, CDCl<sub>3</sub>) δ 8.41 (d, *J* = 8.2 Hz, 1H), 7.88 (d, *J* = 5.4 Hz, 2H), 7.77 (s, 1H), 7.70 (d, *J* = 8.2 Hz, 1H), 7.47 (s, 3H), 7.00 (s, 1H). <sup>13</sup>C NMR (101 MHz, CDCl<sub>3</sub>) δ 161.1, 155.1, 137.9, 136.3 (q, *J* = 33.1 Hz), 131.3, 130.6, 130.6, 129.0, 125.4, 124.2 (q, *J* = 3.3 Hz), 123.1 (q, *J* = 4.0 Hz), 122.8, 121.9, 101.0.

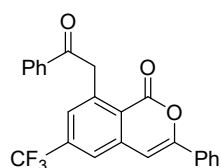

**8-(2-oxo-2-phenylethyl)-3-phenyl-6-(trifluoromethyl)-1H-isochromen-1-one (3na')**: white solid (21.1 mg, 26%).  $^1\text{H}$  NMR (400 MHz,  $\text{CDCl}_3$ )  $\delta$  8.10 (d,  $J = 5.8$  Hz, 2H), 7.84 (s, 2H), 7.73 (s, 1H), 7.62 (s, 1H), 7.54 – 7.50 (m, 3H), 7.45 (s, 3H), 7.00 (s, 1H), 4.96 (s, 2H).  $^{13}\text{C}$  NMR (101 MHz,  $\text{CDCl}_3$ )  $\delta$  196.2, 160.7, 154.8, 141.1, 139.8, 137.0, 135.7, 135.4, 133.2, 131.1, 130.5, 128.9, 128.7, 128.2, 128.0, 125.3, 122.7, 121.5, 101.7, 45.7. HRMS (ESI-TOF) ( $m/z$ ): Calcd for  $\text{C}_{24}\text{H}_{15}\text{F}_3\text{NaO}_3^+$  ( $[\text{M}+\text{Na}]^+$ ) 431.0866, found 431.0861.

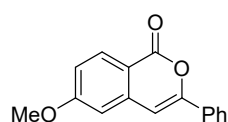

**6-methoxy-3-phenyl-1H-isochromen-1-one (3oa)**: white solid (25.3 mg, 50%). (This compound is known.<sup>3</sup>)  $^1\text{H}$  NMR (400 MHz,  $\text{CDCl}_3$ )  $\delta$  8.23 (d,  $J = 8.8$  Hz, 1H), 7.88 (d,  $J = 6.8$  Hz, 2H), 7.45 (d,  $J = 7.3$  Hz, 3H), 7.02 (d,  $J = 8.7$  Hz, 1H), 6.87 (d,  $J = 5.4$  Hz, 2H), 3.92 (s, 3H).  $^{13}\text{C}$  NMR (101 MHz,  $\text{CDCl}_3$ )  $\delta$  164.7, 162.1, 154.1, 139.8, 132.0, 131.8, 130.0, 128.8, 125.3, 116.5, 113.7, 108.0, 101.8, 55.6.

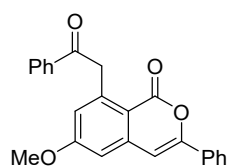

**6-methoxy-8-(2-oxo-2-phenylethyl)-3-phenyl-1H-isochromen-1-one (3oa')**: white solid (30.9 mg, 42%). (This compound is known.<sup>5</sup>)  $^1\text{H}$  NMR (400 MHz,  $\text{CDCl}_3$ )  $\delta$  8.23 (d,  $J = 8.8$  Hz, 1H), 7.88 (d,  $J = 6.8$  Hz, 2H), 7.45 (d,  $J = 7.3$  Hz, 3H), 7.02 (d,  $J = 8.7$  Hz, 1H), 6.87 (d,  $J = 5.4$  Hz, 2H), 3.92 (s, 3H).  $^{13}\text{C}$  NMR (101 MHz,  $\text{CDCl}_3$ )  $\delta$  164.7, 162.1, 154.1, 139.8, 132.0, 131.8, 130.0, 128.8, 125.3, 116.5, 113.7, 108.0, 101.8, 55.6.

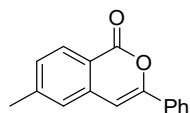

**6-methyl-3-phenyl-1H-isochromen-1-one (3pa):** white solid (28.0 mg, 59%). (This compound is known.<sup>3</sup>) <sup>1</sup>H NMR (400 MHz, CDCl<sub>3</sub>) δ 8.18 (d, *J* = 7.0 Hz, 1H), 7.87 (d, *J* = 7.0 Hz, 2H), 7.44 (d, *J* = 8.0 Hz, 3H), 7.28 (s, 2H), 6.88 (s, 1H), 2.48 (s, 3H). <sup>13</sup>C NMR (101 MHz, CDCl<sub>3</sub>) δ 162.4, 153.7, 146.0, 137.6, 132.1, 129.9, 129.6, 129.6, 128.8, 126.0, 125.2, 118.2, 101.8, 22.0.

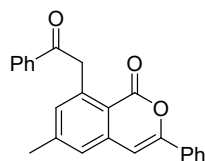

**6-methyl-8-(2-oxo-2-phenylethyl)-3-phenyl-1H-isochromen-1-one (3pa')**: white solid (21.2 mg, 30%). (This compound is known.<sup>5</sup>) <sup>1</sup>H NMR (400 MHz, CDCl<sub>3</sub>) δ 8.11 (d, *J* = 7.3 Hz, 2H), 7.82 (d, *J* = 6.6 Hz, 2H), 7.58 (d, *J* = 6.8 Hz, 1H), 7.52 – 7.49 (m, 2H), 7.42 (d, *J* = 7.2 Hz, 3H), 7.13 (s, 1H), 6.89 (s, 1H), 4.86 (s, 2H), 2.47 (s, 3H). <sup>13</sup>C NMR (101 MHz, CDCl<sub>3</sub>) δ 197.4, 161.7, 153.4, 145.3, 139.5, 139.4, 137.4, 133.6, 132.9, 131.9, 129.8, 128.8, 128.6, 128.3, 125.8, 125.1, 116.7, 102.3, 45.5, 21.7.

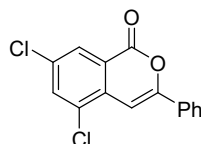

**5,7-dichloro-3-phenyl-1H-isochromen-1-one (3qa):** white solid (39.6 mg, 68%). (This compound is known.<sup>6</sup>) <sup>1</sup>H NMR (400 MHz, DMSO-*d*<sub>6</sub>) δ 8.21 (s, 1H), 8.12 (s, 1H), 7.99 (d, *J* = 3.5 Hz, 2H), 7.57 (s, 3H), 7.41 (s, 1H). <sup>13</sup>C NMR (101 MHz, DMSO-*d*<sub>6</sub>) δ 160.4, 154.9, 135.1, 134.2, 133.5, 131.5, 131.4, 130.7, 129.0, 128.1, 125.6, 122.6, 97.4.

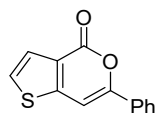

**6-phenyl-4H-thieno[3,2-c]pyran-4-one (3ra):** white solid (18.4 mg, 20%). (This compound is known.<sup>3</sup>) <sup>1</sup>H NMR (400 MHz, CDCl<sub>3</sub>) δ 7.89 – 7.84 (m, 3H), 7.46 (d, *J* = 6.5 Hz, 3H), 7.26 (d, *J* = 1.8 Hz, 1H), 7.13 (s, 1H). <sup>13</sup>C NMR (101 MHz, CDCl<sub>3</sub>) δ 158.3, 156.4, 147.5, 136.8, 131.9, 130.1,

128.9, 125.4, 124.7, 123.0, 99.1.

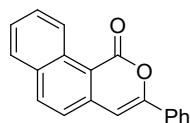

**3-phenyl-1H-benzo[h]isochromen-1-one (3sa):** yellow solid (50.8 mg, 93%). (This compound is known.<sup>7</sup>) <sup>1</sup>H NMR (400 MHz, CDCl<sub>3</sub>) δ 8.92 (s, 1H), 8.01 (d, *J* = 8.1 Hz, 1H), 7.91 (s, br, 4H), 7.65 – 7.61 (m, 1H), 7.56 – 7.52 (m, 1H), 7.49 – 7.43 (m, 3H), 7.07 (s, 1H). <sup>13</sup>C NMR (101 MHz, CDCl<sub>3</sub>) δ 162.6, 152.0, 136.6, 132.4, 132.2, 132.2, 132.0, 129.8, 129.4, 128.8, 127.7, 126.7, 125.2, 124.3, 119.0, 101.9.

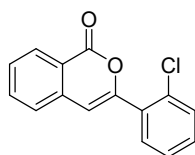

**3-(2-chlorophenyl)-1H-isochromen-1-one (3ab):** white solid (38.4 mg, 75%). (This compound is known.<sup>8</sup>) <sup>1</sup>H NMR (400 MHz, CDCl<sub>3</sub>) δ 8.34 (d, *J* = 7.8 Hz, 1H), 7.77 – 7.73 (m, 2H), 7.57 – 7.49 (m, 3H), 7.37 (s, 2H), 6.99 (s, 1H). <sup>13</sup>C NMR (101 MHz, CDCl<sub>3</sub>) δ 162.3, 151.4, 137.0, 134.9, 132.4, 131.6, 130.7, 129.6, 128.7, 127.0, 126.2, 120.7, 107.7.

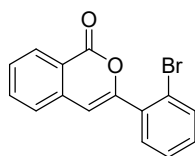

**3-(2-bromophenyl)-1H-isochromen-1-one (3ac):** white solid (51.4 mg, 85%). (This compound is known.<sup>7</sup>) <sup>1</sup>H NMR (400 MHz, CDCl<sub>3</sub>) δ 8.34 (d, *J* = 7.9 Hz, 1H), 7.77 – 7.73 (m, 1H), 7.63 (d, *J* = 8.0 Hz, 1H), 7.63 (d, *J* = 7.6 Hz, 1H), 7.55 (t, *J* = 7.6 Hz, 1H), 7.51 (d, *J* = 7.8 Hz, 1H), 7.41 (t, *J* = 7.6 Hz, 1H), 7.31 – 7.27 (m, 1H), 6.87 (s, 1H). <sup>13</sup>C NMR (150 MHz, CDCl<sub>3</sub>) δ 162.3, 153.0, 136.9, 134.9, 133.8, 131.0, 131.0, 129.7, 128.7, 127.5, 126.2, 121.9, 120.7, 107.4.

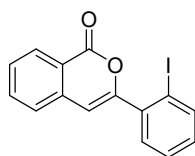

**3-(2-iodophenyl)-1H-isochromen-1-one (3ad):** white solid (50.8 mg, 93%). (This compound is

known.<sup>9</sup>) <sup>1</sup>H NMR (400 MHz, CDCl<sub>3</sub>) δ 8.35 (d, *J* = 7.9 Hz, 1H), 7.98 (d, *J* = 7.9 Hz, 1H), 7.78 – 7.74 (m, 1H), 7.58 – 7.51 (m, 3H), 7.46 – 7.42 (m, 1H), 7.15 – 7.11 (m, 1H), 6.74 (s, 1H). <sup>13</sup>C NMR (150 MHz, CDCl<sub>3</sub>) δ 162.3, 155.4, 140.2, 137.9, 136.9, 134.9, 131.1, 130.5, 129.7, 128.7, 128.2, 126.1, 120.7, 107.2, 96.4.

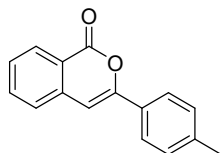

**3-(*p*-tolyl)-1H-isochromen-1-one (3ae)**: white solid (33.6 mg, 71%). (This compound is known.<sup>6</sup>) <sup>1</sup>H NMR (400 MHz, CDCl<sub>3</sub>) δ 8.30 (d, *J* = 7.7 Hz, 1H), 7.77 (d, *J* = 7.4 Hz, 2H), 7.72 – 7.68 (m, 1H), 7.48 (s, 2H), 7.27 (s, 1H), 6.90 (s, 1H), 2.40 (s, 3H). <sup>13</sup>C NMR (101 MHz, CDCl<sub>3</sub>) δ 162.4, 153.8, 140.3, 137.7, 134.8, 129.6, 129.5, 129.2, 127.9, 125.8, 125.2, 120.4, 101.1, 21.4.

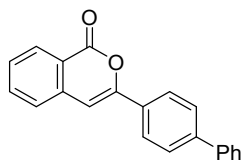

**3-(1,1'-biphenyl-4-yl)-1H-isochromen-1-one (3af)**: white solid (47.0 mg, 79%). (This compound is known.<sup>6</sup>) <sup>1</sup>H NMR (400 MHz, CDCl<sub>3</sub>) δ 8.29 (d, *J* = 7.8 Hz, 1H), 7.92 (d, *J* = 7.7 Hz, 2H), 7.69 – 7.65 (m, 3H), 7.62 (d, *J* = 7.4 Hz, 2H), 7.48 – 7.43 (m, 4H), 7.39 – 7.35 (m, 1H), 6.96 (s, 1H). <sup>13</sup>C NMR (101 MHz, CDCl<sub>3</sub>) δ 162.3, 153.4, 142.7, 140.0, 137.6, 134.9, 130.8, 129.7, 128.9, 128.2, 127.9, 127.4, 127.1, 126.0, 125.7, 120.6, 101.8.

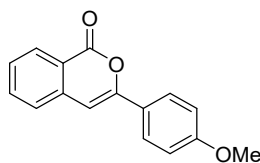

**3-(4-methoxyphenyl)-1H-isochromen-1-one (3ag)**: white solid (33.9 mg, 67%). (This compound is known.<sup>6</sup>) <sup>1</sup>H NMR (400 MHz, CDCl<sub>3</sub>) δ 8.28 (d, *J* = 7.8 Hz, 1H), 7.82 (d, *J* = 8.6 Hz, 2H), 7.71 – 7.67 (m, 1H), 7.46 – 7.45 (m, 2H), 6.97 (d, *J* = 8.6 Hz, 2H), 6.82 (s, 1H), 3.86 (s, 3H). <sup>13</sup>C NMR (101 MHz, CDCl<sub>3</sub>) δ 162.5, 161.1, 153.7, 137.9, 134.8, 129.6, 127.7, 126.8, 125.7, 124.5, 120.1, 114.2, 100.2, 55.4.



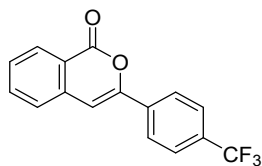

**3-(4-(trifluoromethyl)phenyl)-1H-isochromen-1-one (3ah):** white solid (42.0 mg, 72%) .(This compound is known.<sup>3</sup>) <sup>1</sup>H NMR (400 MHz, CDCl<sub>3</sub>) δ 8.33 (d, *J* = 7.9 Hz, 1H), 8.00 (d, *J* = 8.0 Hz, 2H), 7.76 – 7.71 (m, 3H), 7.57 – 7.53 (m, 2H), 7.05 (s, 1H). <sup>13</sup>C NMR (101 MHz, CDCl<sub>3</sub>) δ 161.8, 152.0, 136.9, 135.3, 135.1, 131.8, 131.4, 129.8, 128.9, 126.3, 125.8 (q, *J* = 3.6 Hz), 125.5, 120.9, 103.4.

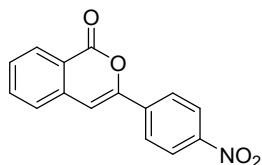

**3-(4-nitrophenyl)-1H-isochromen-1-one (3ai):** white solid (15.1 mg, 28%). (This compound is known.<sup>8</sup>) <sup>1</sup>H NMR (400 MHz, CDCl<sub>3</sub>) δ 8.36 – 8.32 (m, 3H), 8.07 (d, *J* = 8.5 Hz, 2H), 7.79 (t, *J* = 7.0 Hz, 1H), 7.62 – 7.57 (m, 2H), 7.14 (s, 1H). <sup>13</sup>C NMR (101 MHz, CDCl<sub>3</sub>) δ 161.5, 151.1, 148.3, 137.8, 136.5, 135.3, 129.9, 129.4, 126.6, 125.9, 124.2, 121.0, 104.9.

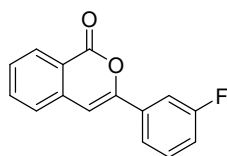

**3-(3-fluorophenyl)-1H-isochromen-1-one (3aj):** white solid (26.2 mg, 54%). (This compound is known.<sup>6</sup>) <sup>1</sup>H NMR (400 MHz, CDCl<sub>3</sub>) δ 8.32 (d, *J* = 7.9 Hz, 1H), 7.75 (t, *J* = 7.6 Hz, 1H), 7.67 (d, *J* = 7.8 Hz, 1H), 7.59 (d, *J* = 9.8 Hz, 1H), 7.55 – 7.51 (m, 2H), 7.46 – 7.41 (m, 1H), 7.13 (t, *J* = 8.2 Hz, 1H), 6.97 (s, 1H). <sup>13</sup>C NMR (101 MHz, CDCl<sub>3</sub>) δ 164.3, 162.0 (d, *J* = 8.3 Hz), 152.3, 137.1, 135.0, 134.2 (d, *J* = 8.1 Hz), 130.5 (d, *J* = 8.3 Hz), 129.8, 128.6, 126.2, 120.9 (d, *J* = 2.8 Hz), 120.7, 116.9 (d, *J* = 21.4 Hz), 112.3 (d, *J* = 24.0 Hz), 102.6.

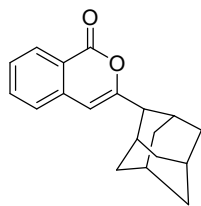

**3-((1S,2S,5R,7S)-adamantan-2-yl)-1H-isochromen-1-one (3ak):** white solid (25.6 mg, 46%). (This compound is known.<sup>3</sup>) <sup>1</sup>H NMR (400 MHz, CDCl<sub>3</sub>) δ 8.25 (d, *J* = 7.8 Hz, 1H), 7.68 – 7.65 (m, 1H), 7.46 – 7.42 (m, 1H), 7.38 (d, *J* = 7.7 Hz, 1H), 6.22 (s, 1H), 2.10 (s, 3H), 1.96 (s, 6H), 1.77 (s, 6H). <sup>13</sup>C NMR (101 MHz, CDCl<sub>3</sub>) δ 165.2, 163.2, 137.8, 134.6, 129.4, 127.5, 125.5, 120.3, 99.7, 39.7, 37.2, 36.6, 28.0.

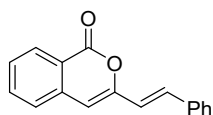

**(E)-3-styryl-1H-isochromen-1-one (3al):** white solid (42.6 mg, 86%). (This compound is known.<sup>10</sup>) <sup>1</sup>H NMR (400 MHz, CDCl<sub>3</sub>) δ 8.29 (d, *J* = 8.0 Hz, 1H), 7.71 – 7.67 (m, 1H), 7.53 (d, *J* = 7.6 Hz, 2H), 7.48 – 7.36 (m, 5H), 7.32 (d, *J* = 7.1 Hz, 1H), 6.71 (d, *J* = 7.6 Hz, 1H), 6.46 (s, 1H). <sup>13</sup>C NMR (101 MHz, CDCl<sub>3</sub>) δ 162.1, 152.6, 137.6, 135.8, 134.9, 133.0, 129.9, 128.9, 128.1, 127.1, 125.8, 120.9, 119.4, 105.8.

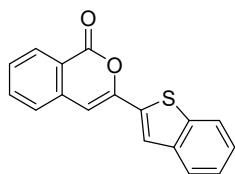

**3-(benzo[b]thiophen-2-yl)-1H-isochromen-1-one (3am):** white solid (36.7 mg, 66%). (This compound is known.<sup>8</sup>) <sup>1</sup>H NMR (400 MHz, CDCl<sub>3</sub>) δ 8.25 (d, *J* = 7.8 Hz, 1H), 7.81 (s, 1H), 7.76 (s, 2H), 7.67 (t, *J* = 7.4 Hz, 1H), 7.47 – 7.41 (m, 2H), 7.35 – 7.33 (m, 2H), 6.78 (s, 1H). <sup>13</sup>C NMR (101 MHz, CDCl<sub>3</sub>) δ 161.5, 149.2, 139.7, 139.6, 137.0, 135.0, 134.9, 129.8, 128.4, 126.0, 125.8, 125.0, 124.5, 123.3, 122.3, 120.6, 102.9.

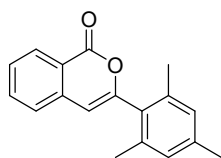

**3-mesityl-1H-isochromen-1-one (3an):** white solid (17.6 mg, 33%).  $^1\text{H}$  NMR (400 MHz,  $\text{CDCl}_3$ )  $\delta$  8.39 (d,  $J = 8.0$  Hz, 1H), 7.80 – 7.77 (m, 1H), 7.58 (t,  $J = 7.6$  Hz, 1H), 7.50 (d,  $J = 7.8$  Hz, 1H), 6.98 (s, 2H), 6.48 (s, 1H), 2.37 (s, 3H), 2.31 (s, 6H).  $^{13}\text{C}$  NMR (101 MHz,  $\text{CDCl}_3$ )  $\delta$  163.2, 154.3, 139.4, 137.3, 134.8, 130.1, 129.6, 128.4, 128.2, 125.6, 120.4, 107.2, 60.4, 21.2, 20.0. HRMS (ESI-TOF) (m/z): Calcd for  $\text{C}_{18}\text{H}_{16}\text{NaO}_2^+$  ( $[\text{M}+\text{Na}]^+$ ) 287.1043, found 287.1036.

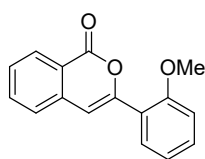

**3-(2-methoxyphenyl)-1H-isochromen-1-one (3ao):** white solid (33.7 mg, 67%). (This compound is known.<sup>6</sup>)  $^1\text{H}$  NMR (400 MHz,  $\text{CDCl}_3$ )  $\delta$  8.35 (d,  $J = 7.9$  Hz, 1H), 8.03 – 8.01 (m, 1H), 7.77 – 7.73 (m, 1H), 7.55 – 7.51 (m, 2H), 7.45 – 7.41 (m, 2H), 7.14 – 7.05 (m, 2H), 4.01 (s, 3H).  $^{13}\text{C}$  NMR (101 MHz,  $\text{CDCl}_3$ )  $\delta$  162.7, 157.2, 150.4, 138.1, 134.7, 130.8, 129.4, 128.8, 128.0, 126.3, 120.9, 120.7, 120.6, 111.4, 107.0, 55.6.

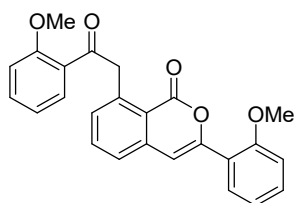

**3-(2-methoxyphenyl)-8-(2-(2-methoxyphenyl)-2-oxoethyl)-1H-isochromen-1-one (3ao'):** white solid (15.2 mg, 19%).  $^1\text{H}$  NMR (400 MHz,  $\text{CDCl}_3$ )  $\delta$  7.92 (d,  $J = 7.6$  Hz, 1H), 7.86 (d,  $J = 7.4$  Hz, 1H), 7.65 – 7.62 (m, 1H), 7.49 – 7.42 (m, 2H), 7.37 (s, 2H), 7.30 (d,  $J = 7.0$  Hz, 1H), 7.06 – 6.99 (m, 4H), 4.88 (s, 2H), 3.96 (s, 6H).  $^{13}\text{C}$  NMR (101 MHz,  $\text{CDCl}_3$ )  $\delta$  198.9, 161.8, 158.5, 157.2, 150.0, 140.0, 139.8, 134.0, 133.2, 132.0, 130.8, 130.6, 128.7, 128.7, 125.8, 120.8, 120.7, 119.2, 111.4, 111.3, 107.6, 55.6, 55.6, 50.8. HRMS (ESI-TOF) (m/z): Calcd for  $\text{C}_{25}\text{H}_{20}\text{NaO}_5^+$  ( $[\text{M}+\text{Na}]^+$ ) 423.1203, found 423.1193

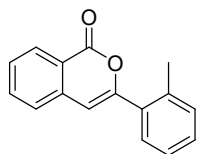

**3-(*o*-tolyl)-1H-isochromen-1-one (3ap)**: white solid (29.7 mg, 63%). (This compound is known.<sup>3</sup>) <sup>1</sup>H NMR (400 MHz, CDCl<sub>3</sub>) δ 8.33 (d, *J* = 7.8 Hz, 1H), 7.75 – 7.72 (m, 1H), 7.54 – 7.47 (m, 3H), 7.37 – 7.33 (m, 1H), 7.29 (s, 1H), 6.61 (s, 1H), 2.51 (s, 3H). <sup>13</sup>C NMR (101 MHz, CDCl<sub>3</sub>) δ 162.6, 155.6, 137.5, 136.8, 134.8, 132.8, 131.1, 129.8, 129.6, 129.2, 126.0, 125.8, 120.3, 105.9, 20.8.

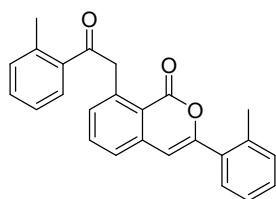

**8-(2-oxo-2-(*o*-tolyl)ethyl)-3-(*o*-tolyl)-1H-isochromen-1-one (3ap')**: white solid (19.9 mg, 27%). <sup>1</sup>H NMR (400 MHz, CDCl<sub>3</sub>) δ 7.99 (d, *J* = 7.4 Hz, 1H), 7.71 – 7.67 (m, 1H), 7.51 (d, *J* = 7.1 Hz, 1H), 7.44 (d, *J* = 7.6 Hz, 1H), 7.39 (d, *J* = 7.1 Hz, 1H), 7.33 (d, *J* = 6.8 Hz, 3H), 7.28 (s, 1H), 6.61 (s, 1H), 4.84 (s, 2H), 2.50 (d, *J* = 6.8 Hz, 6H). <sup>13</sup>C NMR (101 MHz, CDCl<sub>3</sub>) δ 200.7, 162.0, 155.3, 139.5, 139.4, 138.5, 138.0, 136.8, 136.0, 134.3, 132.5, 132.3, 131.9, 131.2, 131.1, 129.7, 129.1, 128.7, 126.0, 125.7, 119.0, 106.5, 48.6, 21.2, 20.8. HRMS (ESI-TOF) (*m/z*): Calcd for C<sub>25</sub>H<sub>20</sub>NaO<sub>3</sub><sup>+</sup> ([M+Na]<sup>+</sup>) 391.1305, found 391.1297.

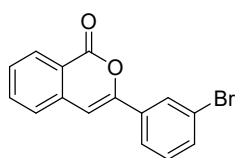

**3-(3-bromophenyl)-1H-isochromen-1-one (3aq)**: white solid (51.4 mg, 85%). (This compound is known.<sup>11</sup>) <sup>1</sup>H NMR (400 MHz, CDCl<sub>3</sub>) δ 8.29 (d, *J* = 7.8 Hz, 1H), 8.01 (s, 1H), 7.80 – 7.71 (m, 2H), 7.50 (d, *J* = 8.4 Hz, 3H), 7.34 – 7.30 (m, 1H), 6.94 (s, 1H). <sup>13</sup>C NMR (101 MHz, CDCl<sub>3</sub>) δ 161.9, 152.0, 137.1, 135.0, 133.9, 132.8, 130.3, 129.7, 128.6, 128.2, 126.2, 123.7, 123.1, 120.7, 102.7.

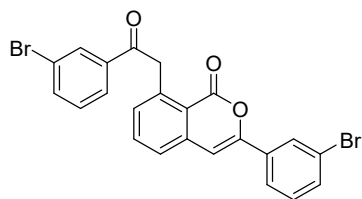

**3-(3-bromophenyl)-8-(2-(3-bromophenyl)-2-oxoethyl)-1H-isochromen-1-one (3aq')**: white solid (11.7 mg, 12%). <sup>1</sup>H NMR (400 MHz, CDCl<sub>3</sub>) δ 8.22 (s, 1H), 8.03 (d, *J* = 7.6 Hz, 1H), 7.98 (s, 1H), 7.76 – 7.69 (m, 3H), 7.52 (d, *J* = 7.8 Hz, 1H), 7.48 (d, *J* = 7.8 Hz, 1H), 7.40 (t, *J* = 7.8 Hz, 1H), 7.32 (d, *J* = 5.4 Hz, 2H), 6.96 (s, 1H), 4.83 (s, 2H). <sup>13</sup>C NMR (101 MHz, CDCl<sub>3</sub>) δ 195.7, 161.4, 151.8, 139.1, 139.1, 139.0, 135.9, 134.6, 133.6, 132.9, 132.6, 131.3, 130.3, 130.2, 128.1, 126.8, 126.1, 123.6, 123.1, 123.0, 119.1, 103.2, 45.7. HRMS (ESI-TOF) (*m/z*): Calcd for C<sub>23</sub>H<sub>14</sub>Br<sub>2</sub>NaO<sub>3</sub><sup>+</sup> ([M+Na]<sup>+</sup>) 518.9202, found 518.9183.

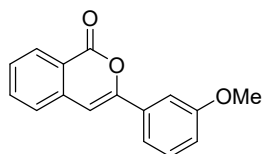

**3-(3-methoxyphenyl)-1H-isochromen-1-one (3ar)**: white solid (37.8 mg, 75%). (This compound is known.<sup>6</sup>) <sup>1</sup>H NMR (400 MHz, CDCl<sub>3</sub>) δ 8.35 (d, *J* = 7.9 Hz, 1H), 7.78 – 7.74 (m, 1H), 7.54 – 7.49 (m, 3H), 7.46 (s, 1H), 7.43 – 7.39 (m, 1H), 7.03 – 6.98 (m, 2H), 3.93 (s, 3H). <sup>13</sup>C NMR (101 MHz, CDCl<sub>3</sub>) δ 162.3, 160.0, 153.4, 137.5, 134.9, 133.4, 129.9, 129.7, 128.2, 126.0, 120.6, 117.7, 116.0, 110.5, 102.1, 55.5.

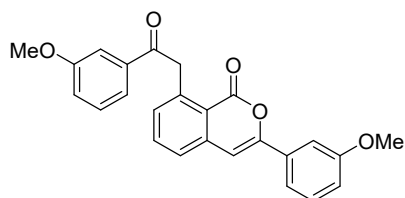

**8-(2-oxo-2-(*o*-tolyl)ethyl)-3-(*o*-tolyl)-1H-isochromen-1-one (3ar')**: white solid (18.4 mg, 23%). <sup>1</sup>H NMR (400 MHz, CDCl<sub>3</sub>) δ 7.77 (d, *J* = 7.5 Hz, 1H), 7.72 – 7.66 (m, 2H), 7.50 – 7.44 (m, 3H), 7.40 – 7.30 (m, 3H), 7.18 (d, *J* = 7.9 Hz, 1H), 6.99 (d, *J* = 6.8 Hz, 2H), 4.93 (s, 2H), 3.90 (d, *J* = 9.3 Hz, 6H). <sup>13</sup>C NMR (101 MHz, CDCl<sub>3</sub>) δ 196.9, 161.7, 160.0, 159.8, 153.1, 139.5, 139.3, 138.6, 134.3, 133.1, 132.2, 129.8, 129.6, 125.8, 120.9, 119.5, 119.1, 117.6, 116.1, 112.5, 110.2, 102.6,

55.4, 45.8. HRMS (ESI-TOF) (m/z): Calcd for C<sub>25</sub>H<sub>20</sub>NaO<sub>5</sub><sup>+</sup> ([M+Na]<sup>+</sup>) 423.1203, found 423.1193.

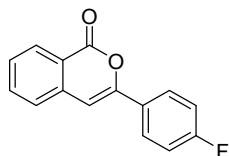

**3-(4-fluorophenyl)-1H-isochromen-1-one (3as)**: white solid (29.7 mg, 62%). (This compound is known.<sup>6</sup>) <sup>1</sup>H NMR (400 MHz, CDCl<sub>3</sub>) δ 8.31 (d, *J* = 7.8 Hz, 1H), 7.89 – 7.86 (m, 2H), 7.72 (t, *J* = 7.5 Hz, 1H), 7.52 – 7.48 (m, 2H), 7.15 (t, *J* = 8.7 Hz, 2H), 6.88 (s, 1H). <sup>13</sup>C NMR (101 MHz, CDCl<sub>3</sub>) δ 162.5, 162.1, 152.8, 137.4, 134.9, 129.7, 128.3 (d, *J* = 3.1 Hz), 128.2, 127.3 (d, *J* = 8.5 Hz), 125.9, 120.4, 116.0 (d, *J* = 22.1 Hz), 101.5.

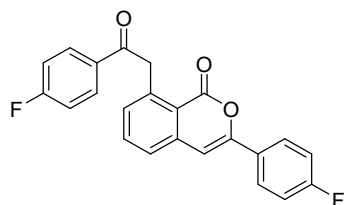

**3-(4-fluorophenyl)-8-(2-(4-fluorophenyl)-2-oxoethyl)-1H-isochromen-1-one (3as')**: white solid (23.3 mg, 31%). <sup>1</sup>H NMR (400 MHz, CDCl<sub>3</sub>) δ 8.20 – 8.17 (m, 2H), 7.88 – 7.85 (m, 2H), 7.72 (t, *J* = 7.7 Hz, 1H), 7.51 (d, *J* = 7.8 Hz, 1H), 7.36 (d, *J* = 7.3 Hz, 1H), 7.25 – 7.16 (m, 4H), 6.94 (s, 1H), 4.91 (s, 2H). <sup>13</sup>C NMR (150 MHz, DMSO) δ 195.9, 165.4 (d, *J* = 249.9 Hz), 163.5 (d, *J* = 246.3 Hz), 161.0, 151.7, 140.0, 139.3, 135.2, 134.2, 133.0, 131.4 (d, *J* = 9.3 Hz), 128.5 (d, *J* = 2.5 Hz), 127.7 (d, *J* = 8.6 Hz), 126.4, 118.8, 116.6 (d, *J* = 21.9 Hz), 116.2 (d, *J* = 21.7 Hz), 103.0, 45.7. HRMS (ESI-TOF) (m/z): Calcd for C<sub>23</sub>H<sub>14</sub>F<sub>2</sub>NaO<sub>3</sub><sup>+</sup> ([M+Na]<sup>+</sup>) 399.0803, found 399.0798.

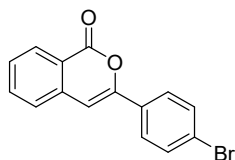

**3-(4-bromophenyl)-1H-isochromen-1-one (3at)**: white solid (45.9 mg, 76%). (This compound is known.<sup>3</sup>) <sup>1</sup>H NMR (400 MHz, CDCl<sub>3</sub>) δ 8.30 (d, *J* = 7.7 Hz, 1H), 7.75 – 7.71 (m, 3H), 7.58 (d, *J* = 8.0 Hz, 2H), 7.53 – 7.48 (m, 2H), 6.94 (s, 1H). <sup>13</sup>C NMR (101 MHz, CDCl<sub>3</sub>) δ 162.0, 152.6, 137.2, 135.0, 132.1, 130.9, 128.5, 126.7, 126.1, 124.3, 120.6, 102.1.

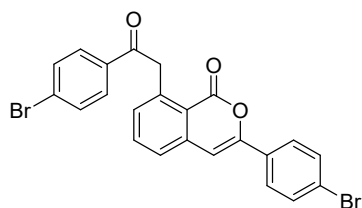

**3-(4-bromophenyl)-8-(2-(4-bromophenyl)-2-oxoethyl)-1H-isochromen-1-one (3at')**: white solid (10.5 mg, 11%). <sup>1</sup>H NMR (400 MHz, CDCl<sub>3</sub>) δ 7.97 (d, *J* = 8.5 Hz, 2H), 7.70 – 7.64 (m, 5H), 7.57 (d, *J* = 8.6 Hz, 2H), 7.47 (d, *J* = 7.8 Hz, 1H), 7.32 (d, *J* = 7.4 Hz, 1H), 6.95 (s, 1H). <sup>13</sup>C NMR (101 MHz, CDCl<sub>3</sub>) δ 196.2, 161.5, 152.4, 139.3, 139.2, 136.1, 134.5, 132.5, 132.1, 131.9, 130.6, 129.8, 128.1, 126.6, 126.0, 124.4, 119.0, 102.7, 45.5. HRMS (ESI-TOF) (*m/z*): Calcd for C<sub>23</sub>H<sub>14</sub>Br<sub>2</sub>NaO<sub>3</sub><sup>+</sup> ([M+Na]<sup>+</sup>) 518.9202, found 518.9197.

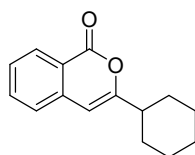

**3-cyclohexyl-1H-isochromen-1-one (3au)**: white solid (32.6 mg, 71%). (This compound is known.<sup>6</sup>) <sup>1</sup>H NMR (400 MHz, CDCl<sub>3</sub>) δ 8.25 (d, *J* = 7.9 Hz, 1H), 7.66 (t, *J* = 7.2 Hz, 1H), 7.44 (t, *J* = 7.6 Hz, 1H), 7.36 (d, *J* = 7.9 Hz, 1H), 6.23 (s, 1H), 2.48 – 2.41 (m, 1H), 2.04 (d, *J* = 12.2 Hz, 2H), 1.85 (d, *J* = 12.6 Hz, 2H), 1.48 – 1.23 (m, 6H). <sup>13</sup>C NMR (150 MHz, CDCl<sub>3</sub>) δ 163.2, 162.4, 137.8, 134.6, 129.5, 127.5, 125.2, 120.3, 100.9, 41.9, 30.6, 26.0.

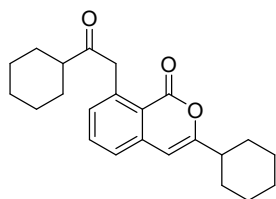

**3-cyclohexyl-8-(2-cyclohexyl-2-oxoethyl)-1H-isochromen-1-one (3au')**: white solid (12.0 mg, 17%). <sup>1</sup>H NMR (400 MHz, CDCl<sub>3</sub>) δ 8.25 (d, *J* = 7.9 Hz, 1H), 7.56 (t, *J* = 7.7 Hz, 1H), 7.27 – 7.26 (m, 1H), 7.12 (d, *J* = 7.3 Hz, 1H), 6.19 (s, 1H), 4.30 (s, 2H), 2.72 – 2.64 (m, 1H), 2.41 – 2.35 (m, 1H), 2.07 – 1.97 (m, 4H), 1.84 – 1.80 (m, 4H), 1.74 – 1.67 (m, 2H), 1.47 – 1.21 (m, 10H). <sup>13</sup>C NMR (101 MHz, CDCl<sub>3</sub>) δ 210.7, 162.5, 161.9, 139.5, 139.4, 134.0, 131.5, 124.8, 118.6, 101.5, 50.9, 47.8, 41.7, 30.5, 28.6, 26.0, 25.8. HRMS (ESI-TOF) (*m/z*): Calcd for C<sub>23</sub>H<sub>28</sub>NaO<sub>3</sub><sup>+</sup> ([M+Na]<sup>+</sup>)

375.1931, found 375.1923.

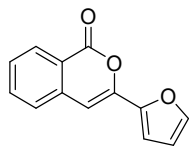

**3-(furan-2-yl)-1H-isochromen-1-one (3av):** white solid (20.8mg, 49%). (This compound is known.<sup>7</sup>) <sup>1</sup>H NMR (400 MHz, CDCl<sub>3</sub>) δ 8.27 (d, *J* = 8.1 Hz, 1H), 7.69 (t, *J* = 7.6 Hz, 1H), 7.51 (s, 1H), 7.48 – 7.45 (m, 2H), 6.94 (d, *J* = 2.8 Hz, 1H), 6.86 (s, 1H), 6.54 – 6.53 (m, 1H). <sup>13</sup>C NMR (101 MHz, CDCl<sub>3</sub>) δ 161.6, 146.9, 146.1, 144.0, 137.3, 135.0, 129.8, 128.0, 126.0, 120.5, 112.1, 110.1, 100.0.

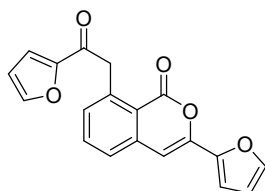

**3-(furan-2-yl)-8-(2-(furan-2-yl)-2-oxoethyl)-1H-isochromen-1-one (3av')**: white solid (10.2 mg, 16%). <sup>1</sup>H NMR (400 MHz, CDCl<sub>3</sub>) δ 7.66 – 7.62 (m, 2H), 7.49 (s, 1H), 7.42 (d, *J* = 7.8 Hz, 1H), 7.29 (d, *J* = 8.6 Hz, 2H), 6.86 (d, *J* = 4.6 Hz, 2H), 6.57 (s, 1H), 6.50 (s, 1H), 4.75 (s, 2H). <sup>13</sup>C NMR (101 MHz, CDCl<sub>3</sub>) δ 185.9, 161.0, 154.6, 152.9, 146.8, 146.1, 146.0, 144.0, 139.2, 138.8, 134.4, 132.3, 125.9, 119.0, 117.0, 112.3, 112.1, 110.1, 100.6, 45.3. HRMS (ESI-TOF) (*m/z*): Calcd for C<sub>19</sub>H<sub>12</sub>NaO<sub>5</sub><sup>+</sup> ([M+Na]<sup>+</sup>) 343.0577, found 343.0572.

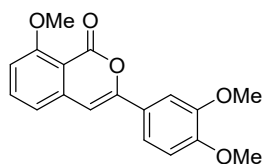

**3-(3,4-dimethoxyphenyl)-8-methoxy-1H-isochromen-1-one (3dw):** Yellow solid (57 mg, 91%). (This compound is known.<sup>12</sup>) <sup>1</sup>H NMR (400 MHz, DMSO-*d*<sub>6</sub>) δ 7.73 – 7.69 (m, 1H), 7.44 (d, *J* = 7.1 Hz, 1H), 7.38 (s, 1H), 7.27 (s, 1H), 7.13 (d, *J* = 6.9 Hz, 1H), 7.08 – 7.05 (m, 2H), 3.86 (t, *J* = 18.5 Hz, 9H). <sup>13</sup>C NMR (101 MHz, DMSO-*d*<sub>6</sub>) δ 161.5, 158.0, 153.2, 150.9, 149.3, 140.8, 136.8, 124.4, 118.4, 118.4, 112.0, 110.6, 108.4, 100.9, 56.4, 56.1, 56.0.



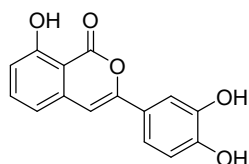

**3-(3,4-dihydroxyphenyl)-8-hydroxy-1H-isochromen-1-one (thunberginol A):** Pale orange solid (30.1 mg, 98%). (This compound is known.<sup>12</sup>) <sup>1</sup>H NMR (400 MHz, DMSO-*d*<sub>6</sub>) δ 10.85 (s, 1H), 9.58 (s, 1H), 9.31 (s, 1H), 7.68 (t, *J* = 7.9 Hz, 1H), 7.28 (s, 1H), 7.23 (d, *J* = 9.0 Hz, 2H), 7.09 (d, *J* = 7.6 Hz, 1H), 6.92 (d, *J* = 8.2 Hz, 1H), 6.86 (d, *J* = 8.3 Hz, 1H). <sup>13</sup>C NMR (101 MHz, DMSO-*d*<sub>6</sub>) δ 165.6, 160.9, 153.2, 148.3, 146.1, 139.0, 138.1, 122.8, 117.4, 117.0, 116.5, 114.5, 112.6, 105.7, 101.1.

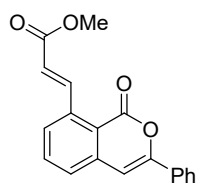

**methyl (E)-3-(1-oxo-3-phenyl-1H-isochromen-8-yl)acrylate (5):** white solid (20.8mg, 49%). <sup>1</sup>H NMR (400 MHz, CDCl<sub>3</sub>) δ 8.38 (d, *J* = 7.6 Hz, 1H), 8.21 (d, *J* = 15.8 Hz, 1H), 7.96 – 7.93 (m, 3H), 7.54 – 7.48 (m, 4H), 7.25 (d, *J* = 12.2 Hz, 1H), 6.51 (d, *J* = 15.7 Hz, 1H), 3.88 (s, 3H). <sup>13</sup>C NMR (101 MHz, CDCl<sub>3</sub>) δ 166.8, 161.9, 154.4, 139.4, 136.1, 132.8, 131.8, 131.6, 130.6, 130.4, 128.9, 127.9, 125.6, 121.9, 121.3, 97.5, 52.0. HRMS (ESI-TOF) (*m/z*): Calcd for C<sub>19</sub>H<sub>14</sub>NaO<sub>4</sub><sup>+</sup> ([M+Na]<sup>+</sup>) 329.0784, found 329.0779.

## VI. References

- (1) E. Chatzopoulou and P. W. Davies, *Chem. Comm*, 2013, **49**, 8617-8619.
- (2) Y. Xu, X. Zhou, G. Zheng and X. Li, *Org. Lett*, 2017, **19**, 5256-5259.
- (3) Y. Xu, G. Zheng, X. Yang and X. Li, *Chem. Comm*, 2018, **54**, 670-673.
- (4) C. Praveen, P. Dheenkumar and P. T. Perumal, *J. Org. Chem*, 2013, **125**, 71-83.
- (5) Y.-F. Liang, L. Yang, T. Rogge and L. Ackermann, *Chem. – Euro. J*, 2018, **24**, 16548-16552.
- (6) G. Jiang, J. Li, C. Zhu, W. Wu and H. Jiang, *Org Lett*, 2017, **19**, 4440-4443.
- (7) Y. Huang, X. Lyu, H. Song and Q. Wang, *Adv. Synth. Catal*, 2019, **361**, 5272-5276.
- (8) Y. S. Kumar, C. Dasaradhan, K. Prabakaran, P. Manivel, F.-R. Nawaz Khan, E. D. Jeong and E. H. Chung, *Tetrahedron*, 2015, **56**, 941-945.
- (9) Z.-Y. Ge, X.-D. Fei, T. Tang, Y.-M. Zhu and J.-K. Shen, *J. Org. Chem*, 2012, **77**, 5736-5743.
- (10) A. P. Kale, G. G. Pawar and M. Kapur, *Org. Lett*, 2012, **14**, 1808-1811.
- (11) Xiang, Zhang, Xintong, Wan, Ying, Cong, Xiaohua, Zhen, Qiao and Daisy, *J. Org. Chem*, 2019, **84**, 10402-10411.
- (12) A. C. Tadd, M. R. Fielding and M. C. Willis, *Chem. Comm*, 2009, 6744-6746.

## VII. <sup>1</sup>H NMR and <sup>13</sup>C NMR Spectra of New Compound

3aa, CDCl<sub>3</sub>, 400 MHz

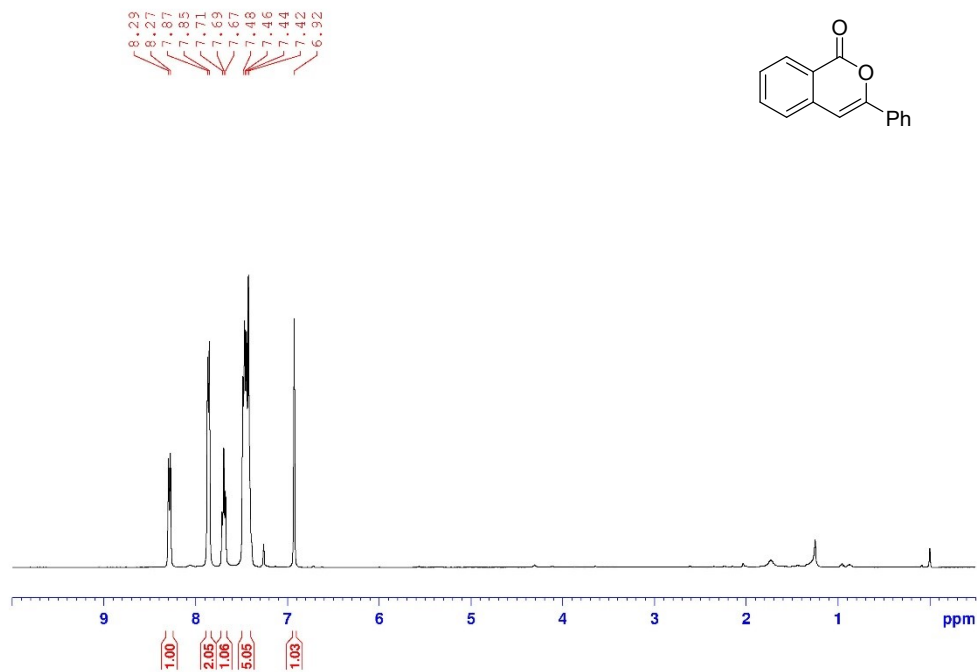

3aa, CDCl<sub>3</sub>, 100 MHz

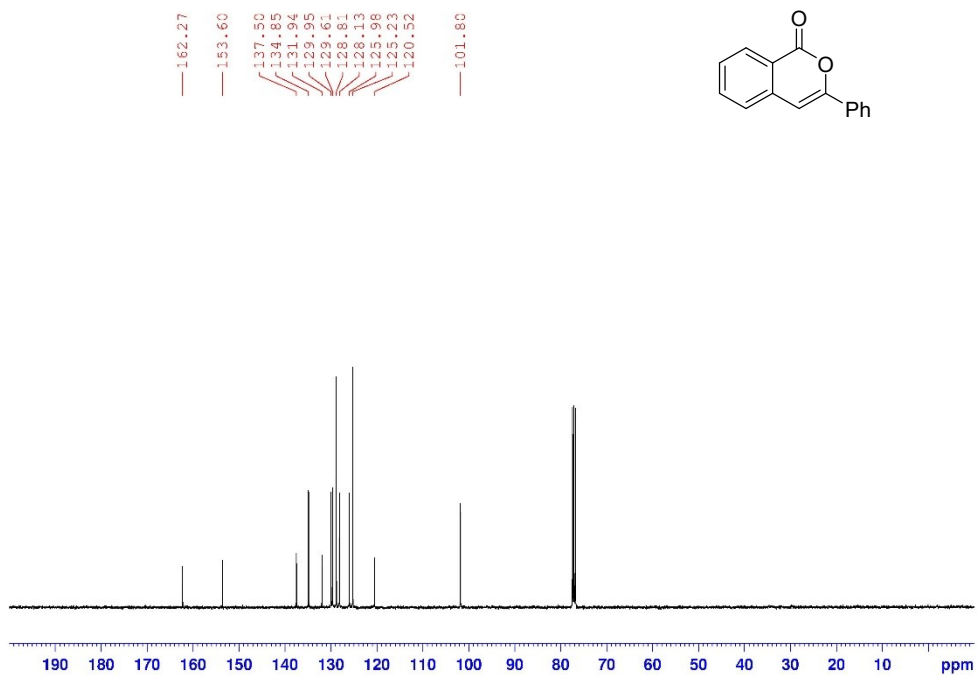



3ca, CDCl<sub>3</sub>, 400 MHz

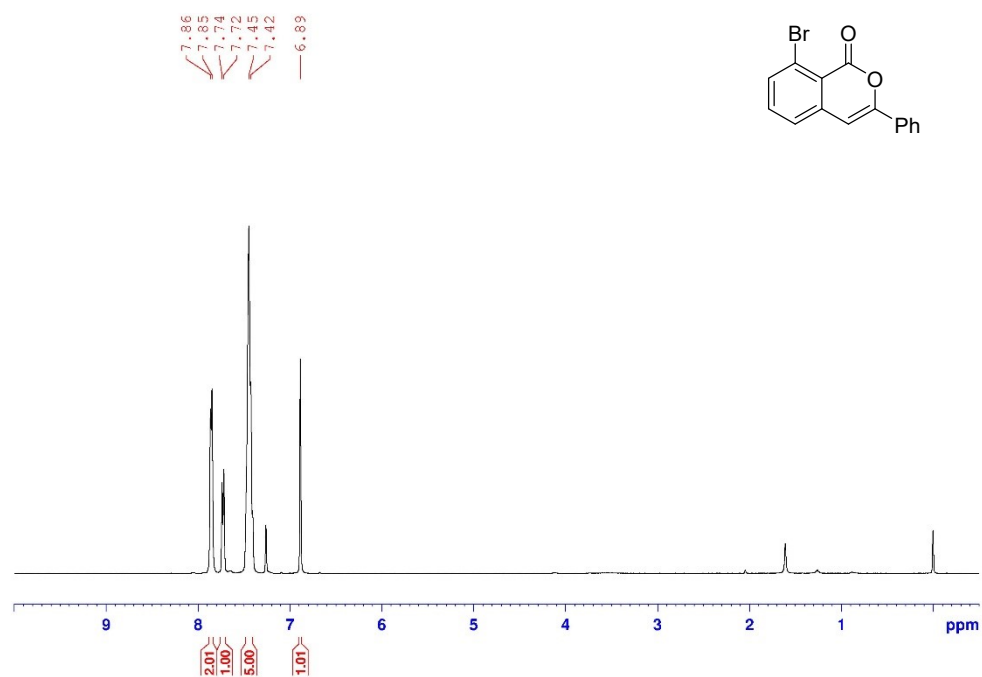

3ca, CDCl<sub>3</sub>, 100 MHz

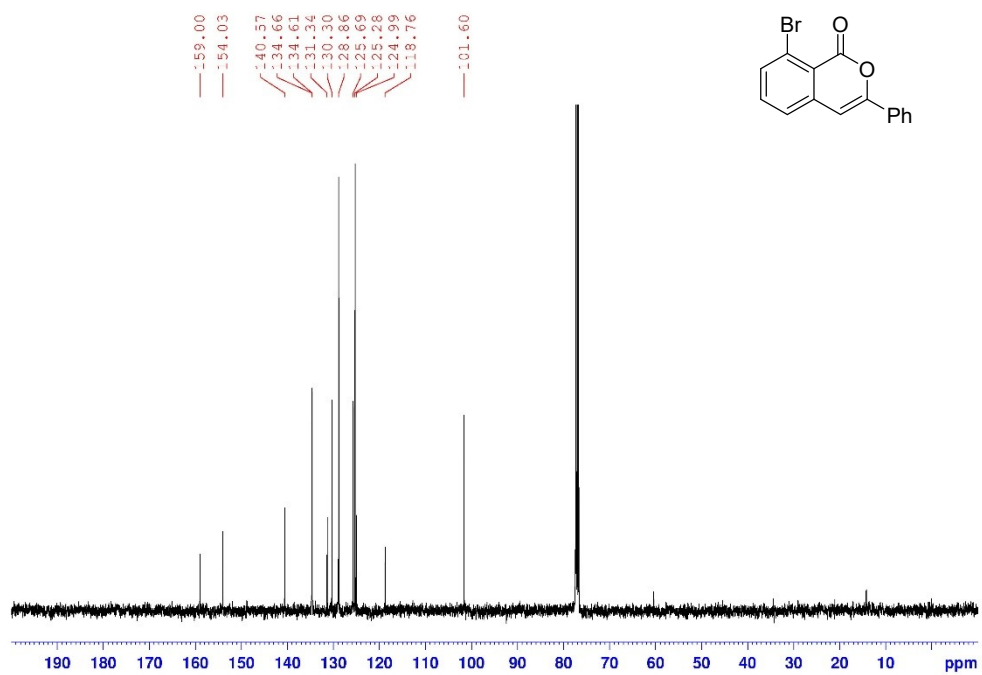

3da, CDCl<sub>3</sub>, 400 MHz

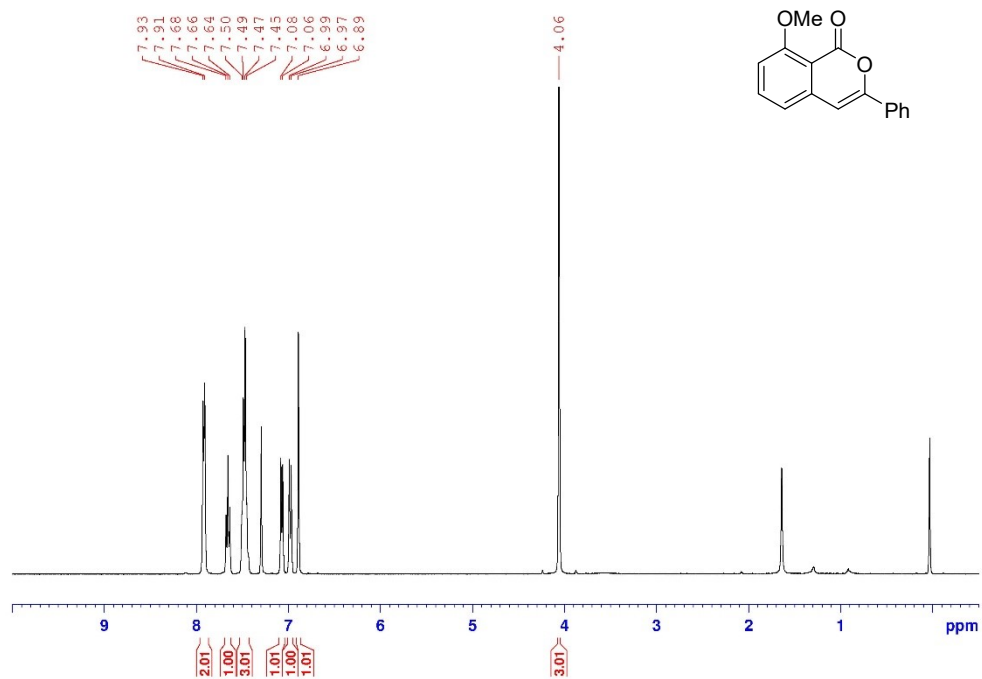

3da, CDCl<sub>3</sub>, 100 MHz

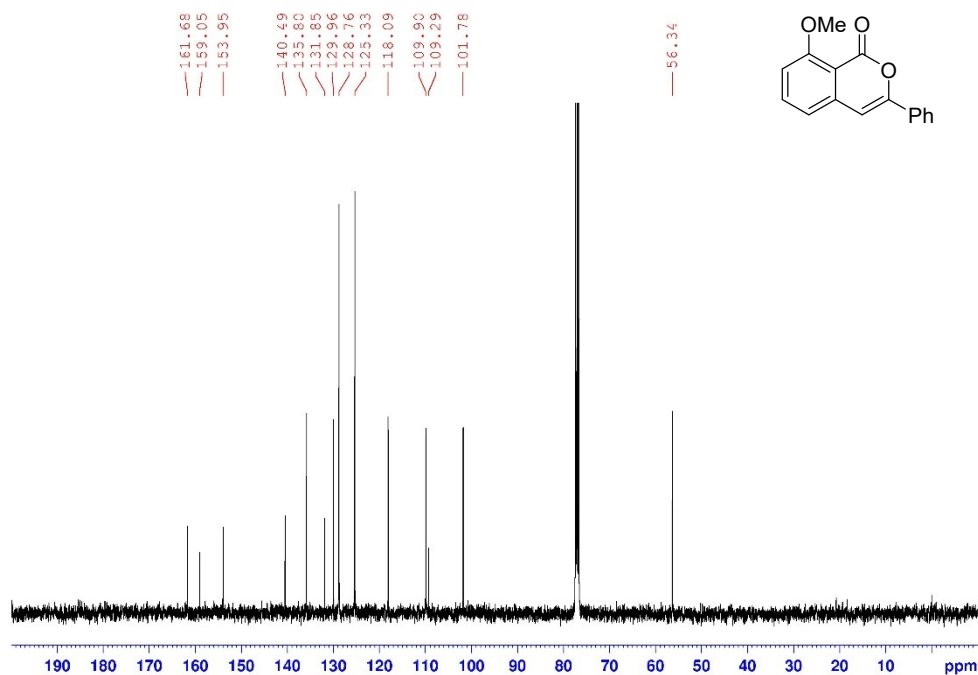

3ea, CDCl<sub>3</sub>, 400 MHz

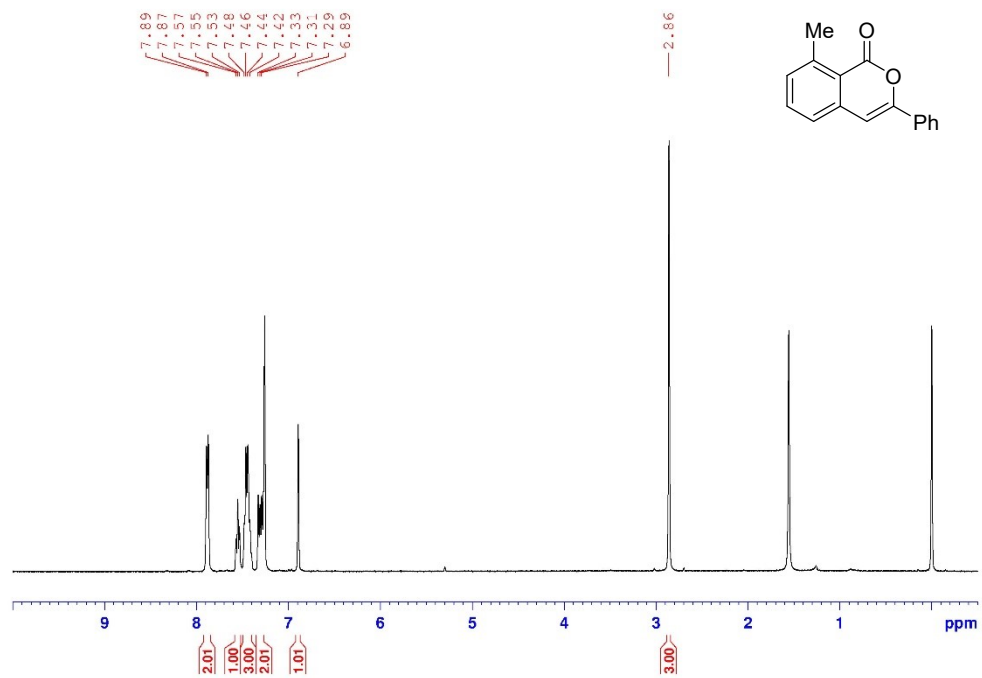

3ea, CDCl<sub>3</sub>, 150 MHz

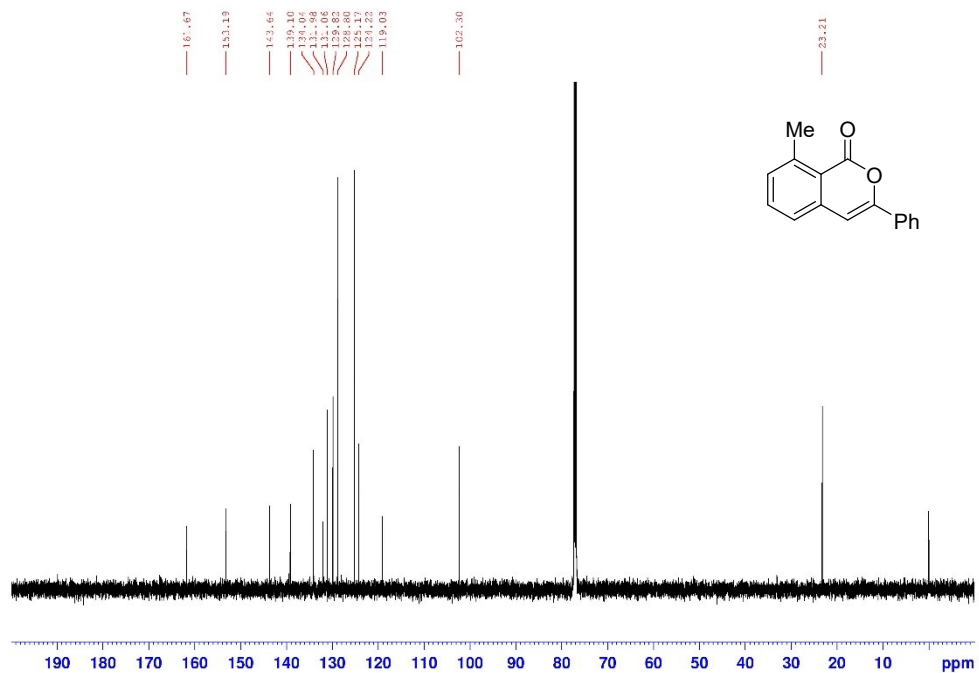

3fa, CDCl<sub>3</sub>, 400 MHz

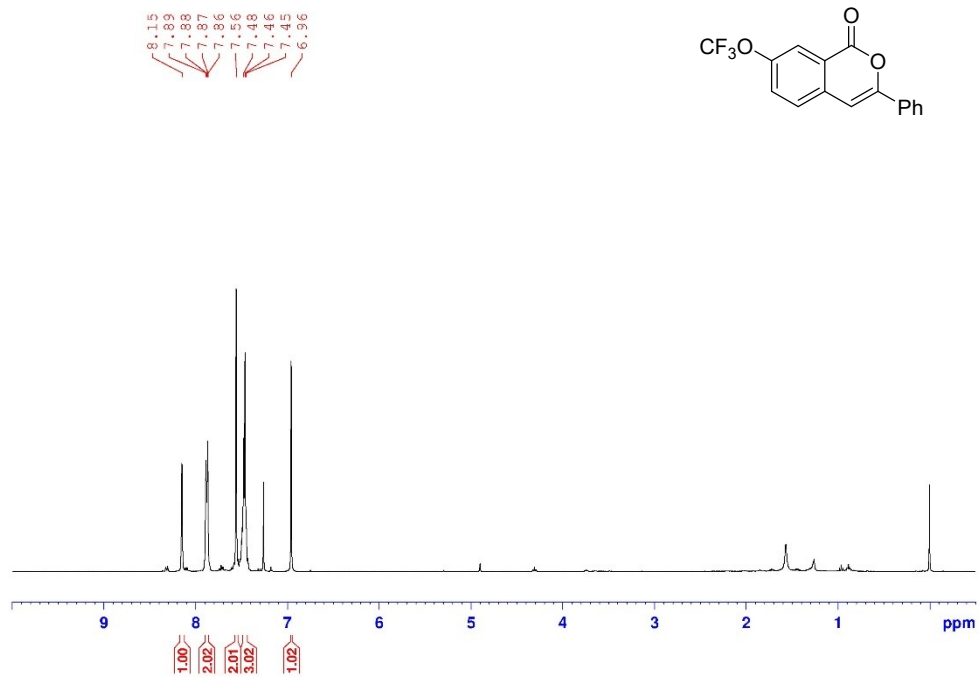

3fa, CDCl<sub>3</sub>, 100 MHz

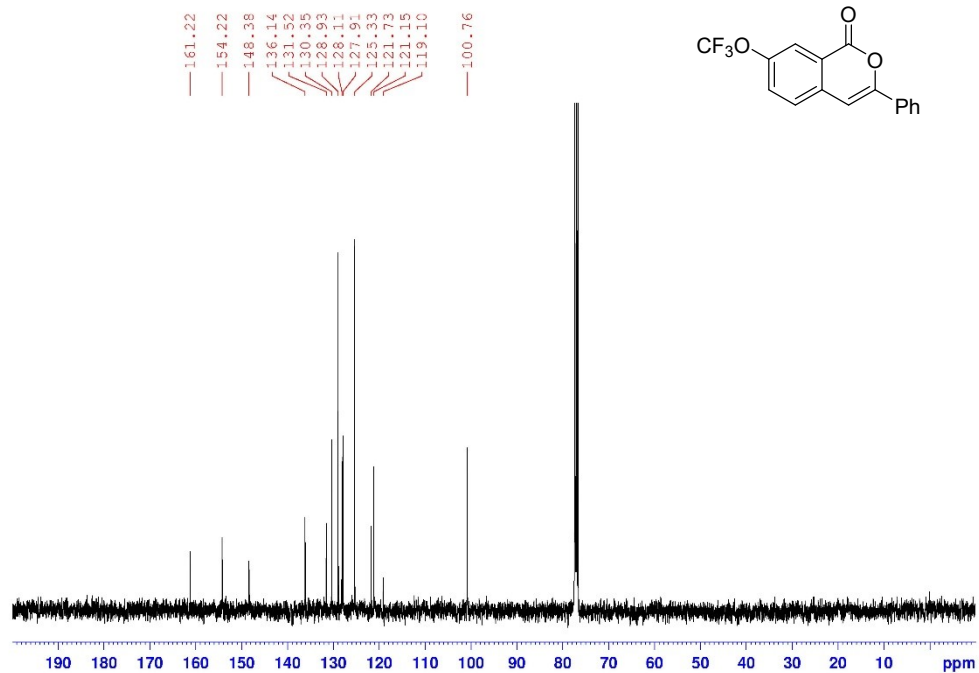



3ga, CDCl<sub>3</sub>, 400 MHz

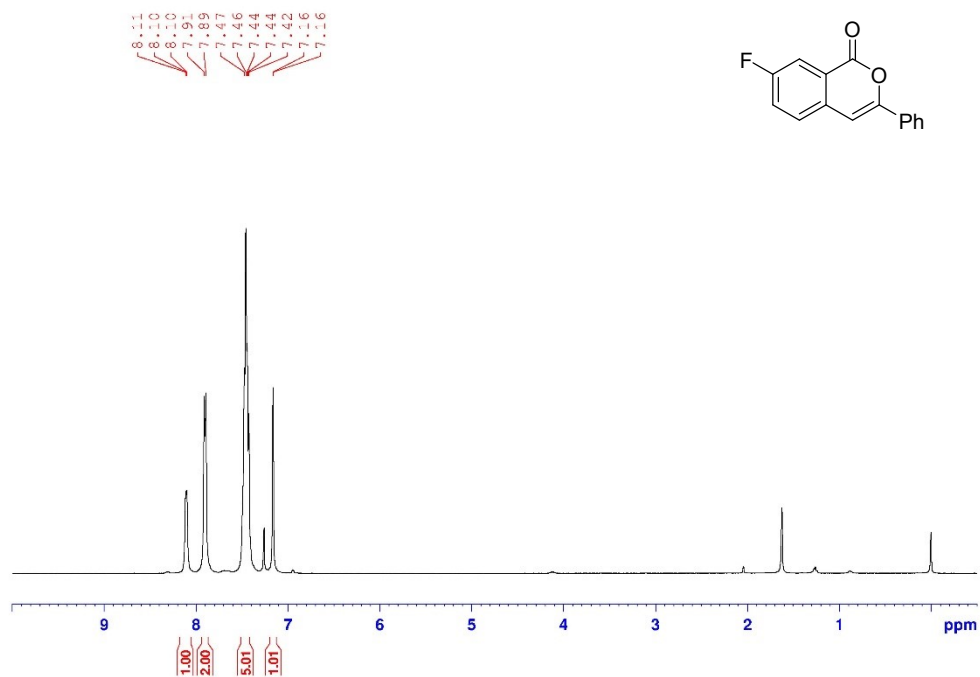

3ga, CDCl<sub>3</sub>, 100 MHz

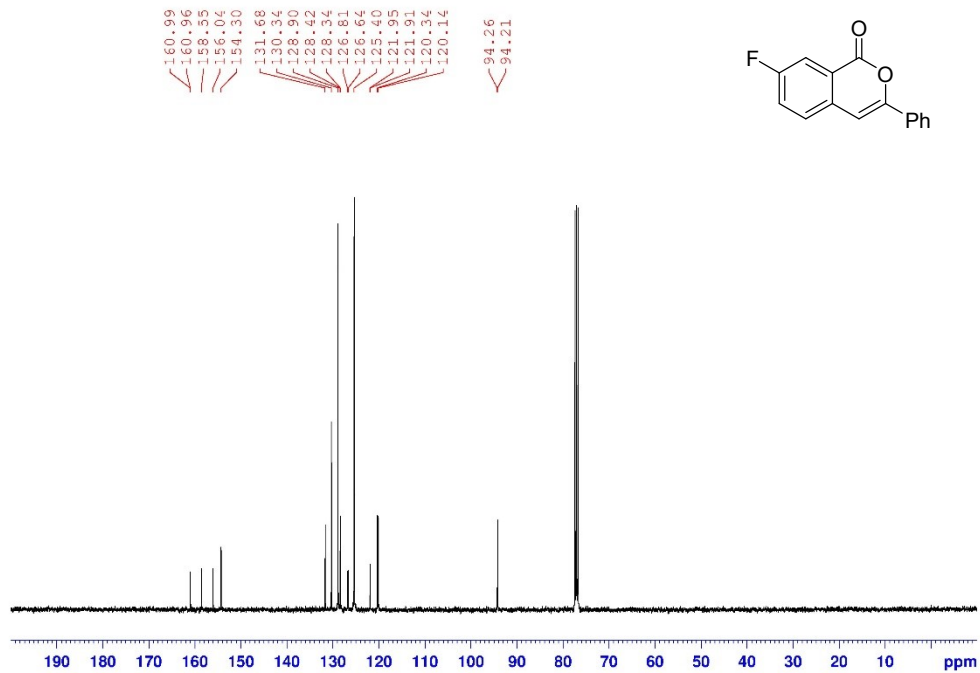

3ha, CDCl<sub>3</sub>, 400 MHz

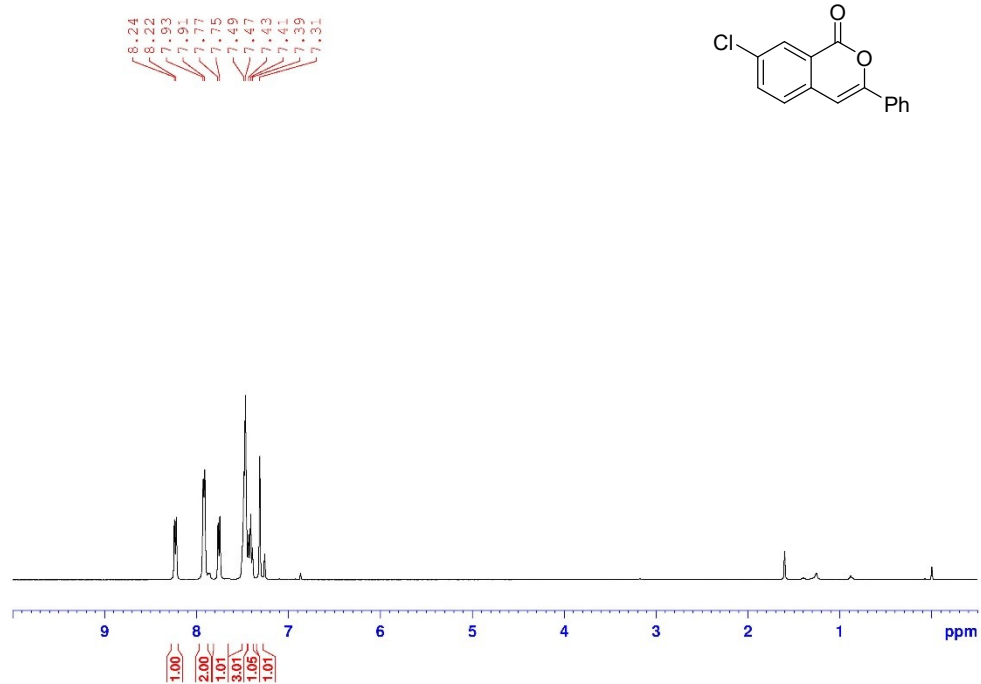

3ha, CDCl<sub>3</sub>, 100 MHz

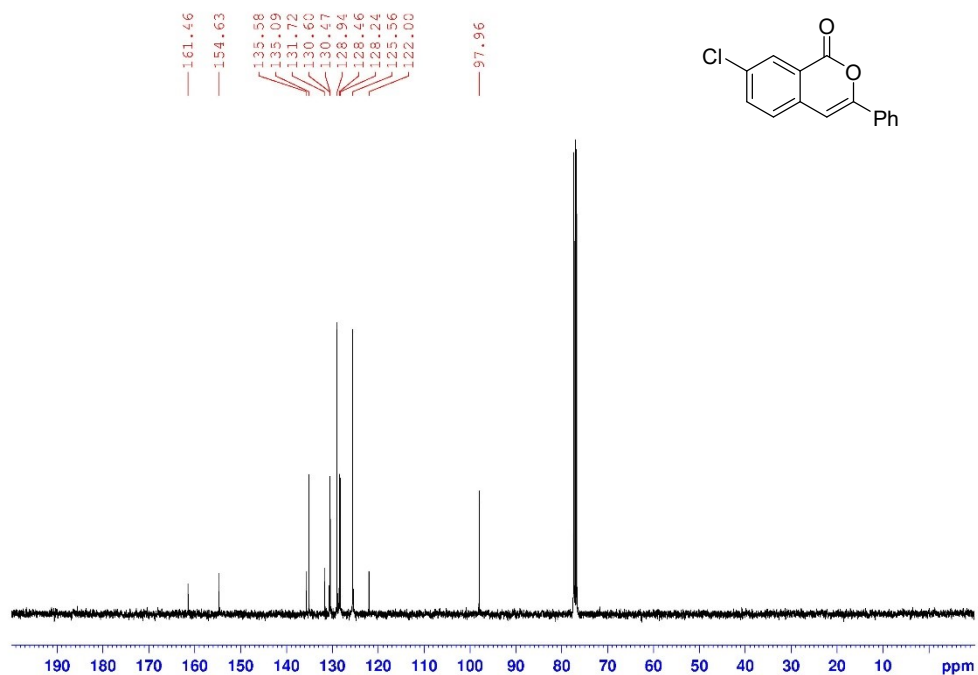

3ia, CDCl<sub>3</sub>, 400 MHz

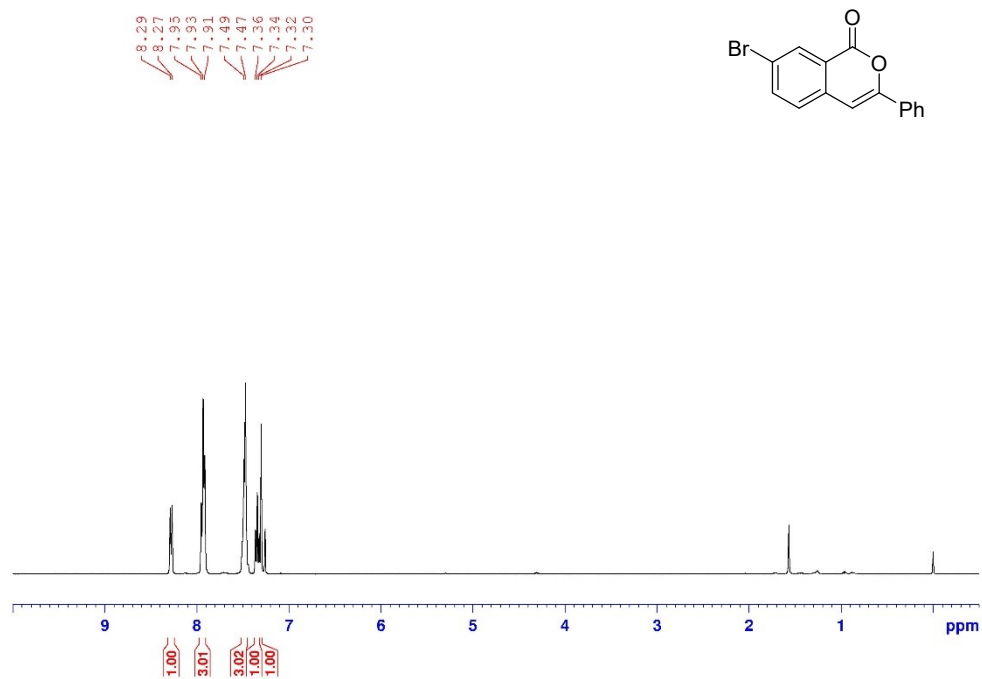

3ia, CDCl<sub>3</sub>, 100 MHz

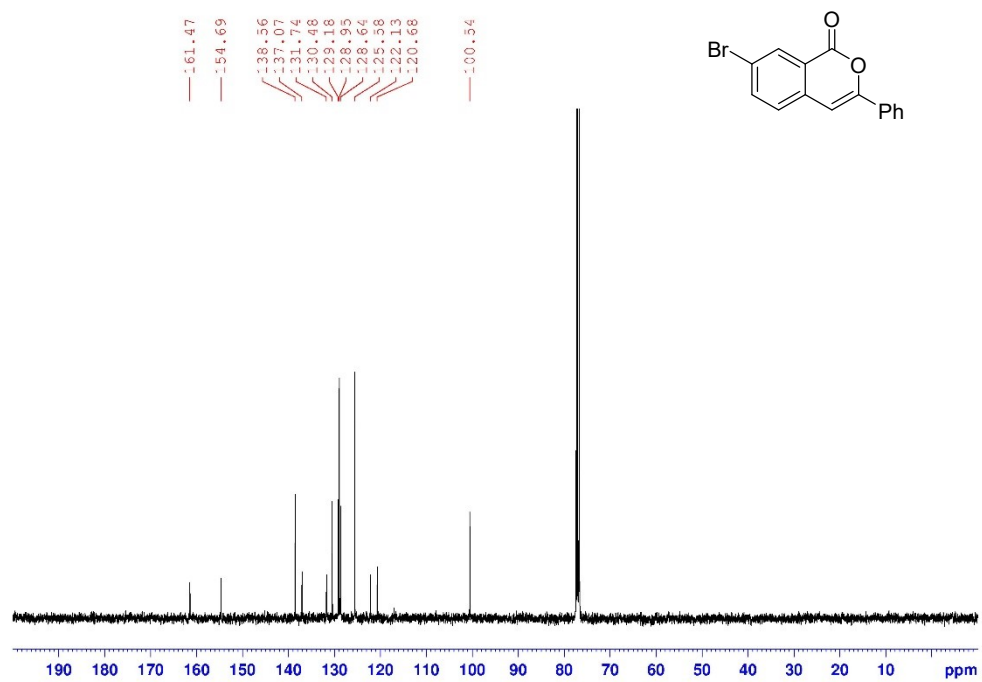

3ja, CDCl<sub>3</sub>, 400 MHz

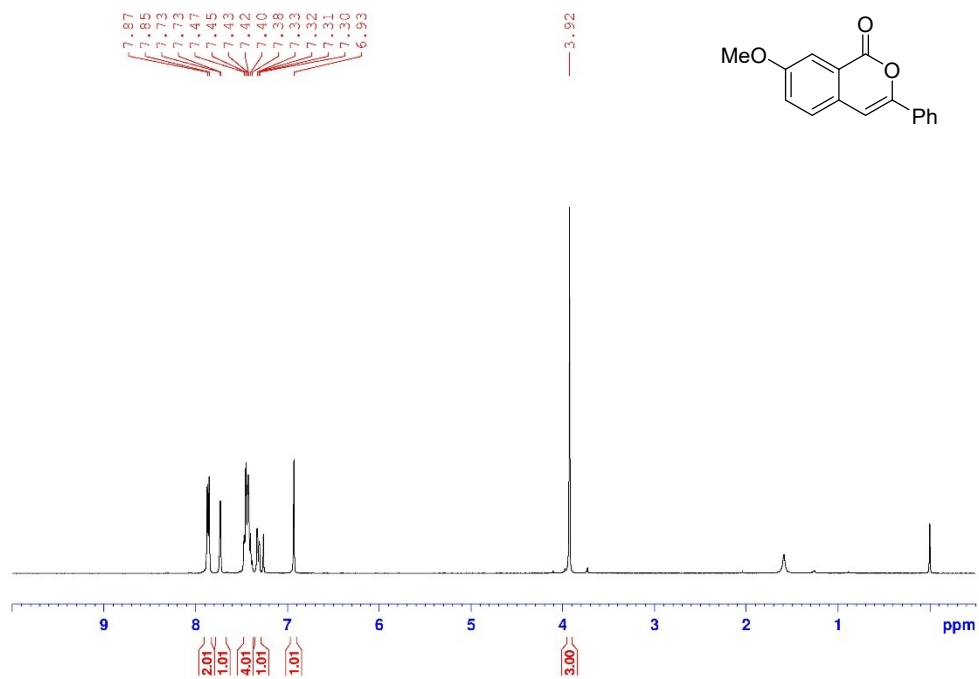

3ja, CDCl<sub>3</sub>, 100 MHz

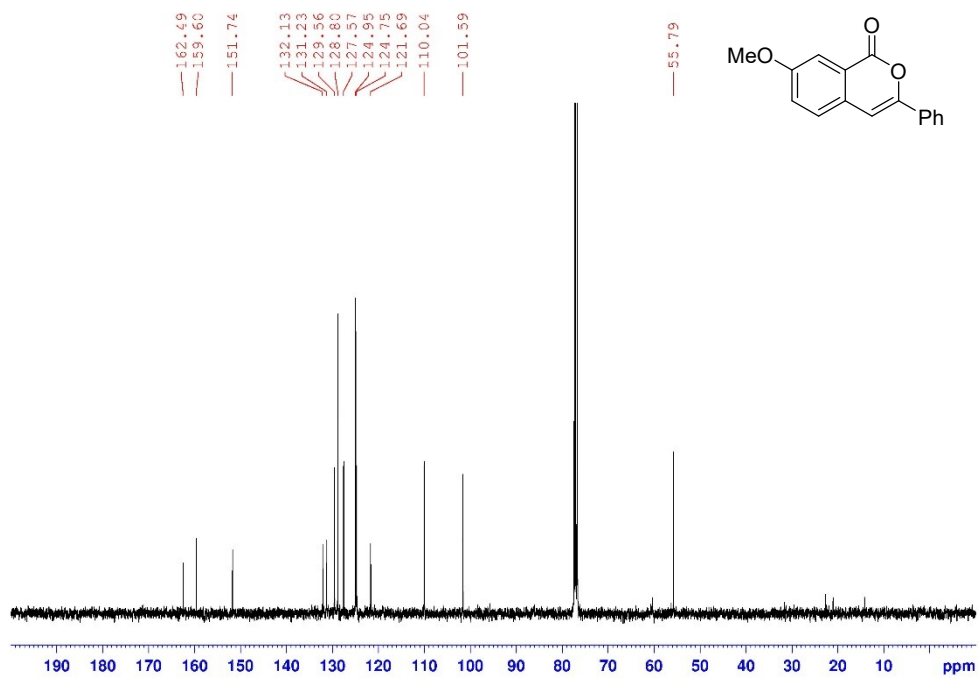

3ka, CDCl<sub>3</sub>, 400 MHz

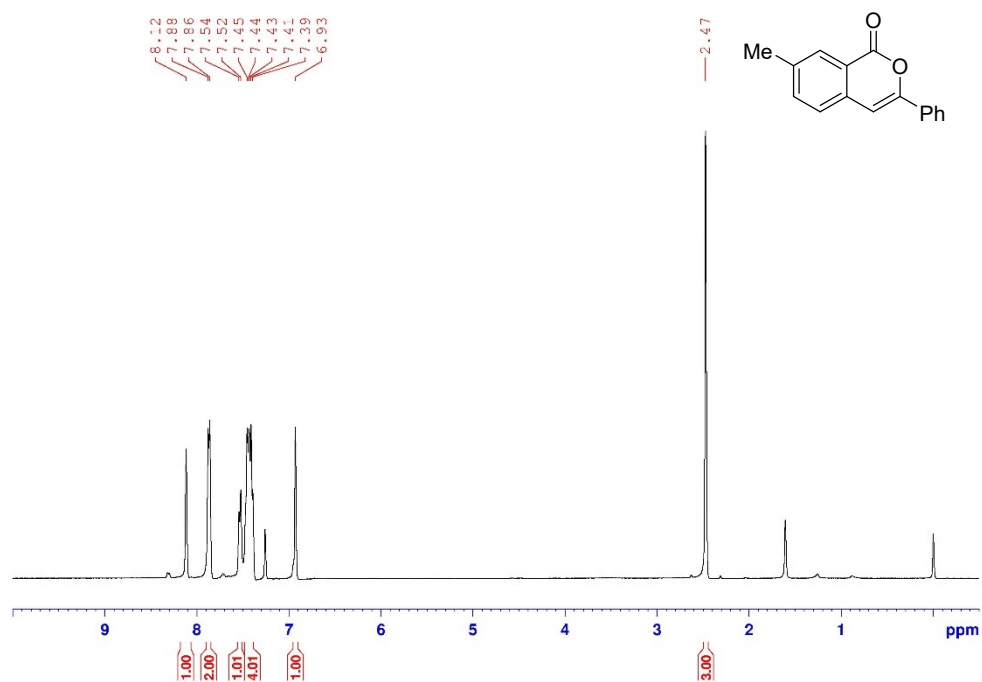

3ka, CDCl<sub>3</sub>, 100 MHz

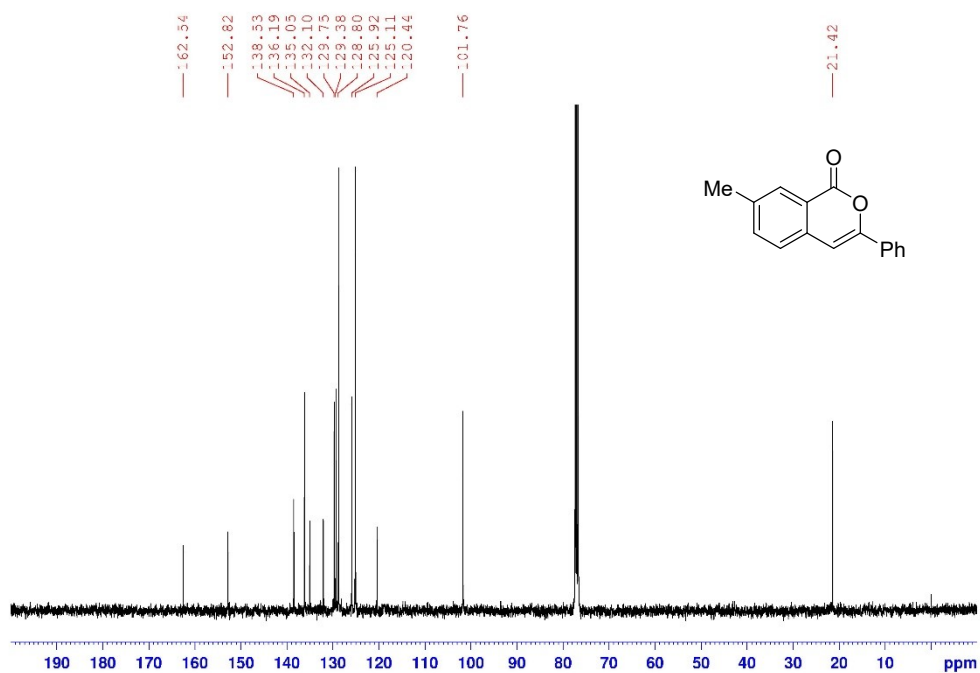

3la, CDCl<sub>3</sub>, 400 MHz

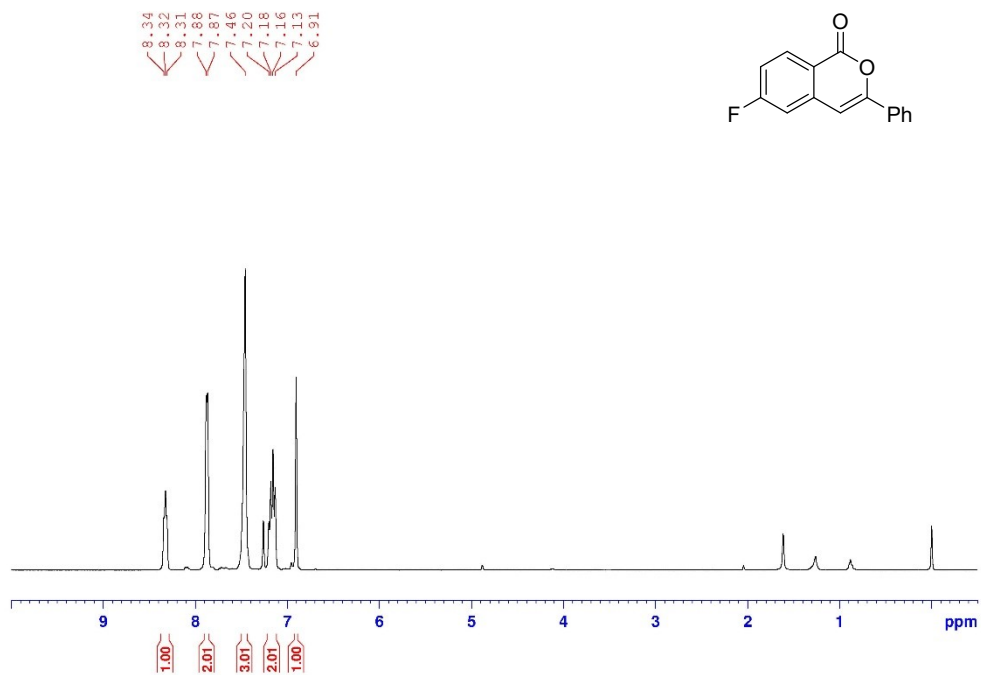

3la, CDCl<sub>3</sub>, 100 MHz

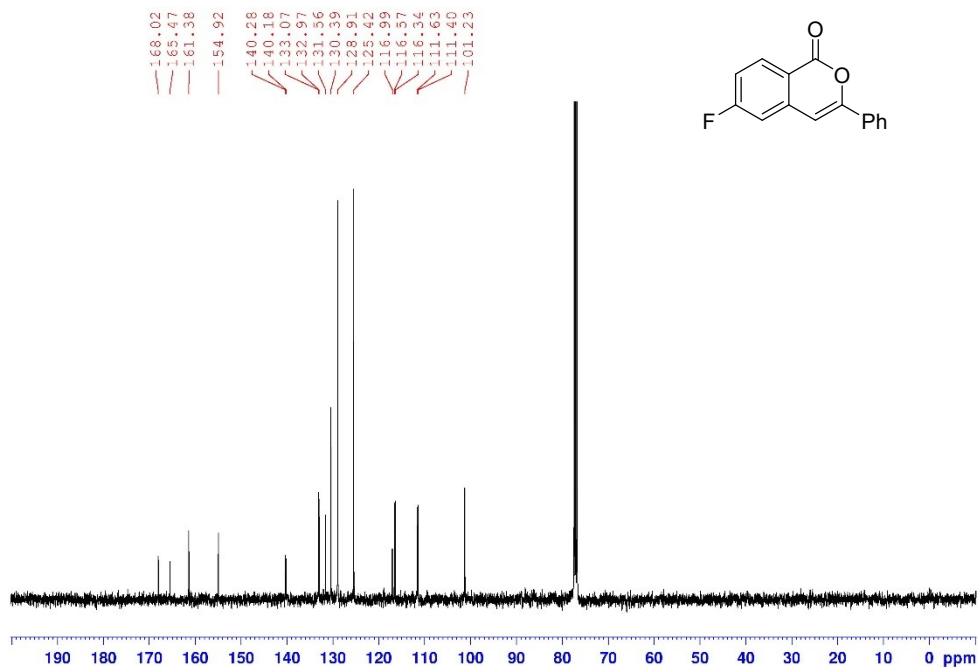

3ma, CDCl<sub>3</sub>, 400 MHz

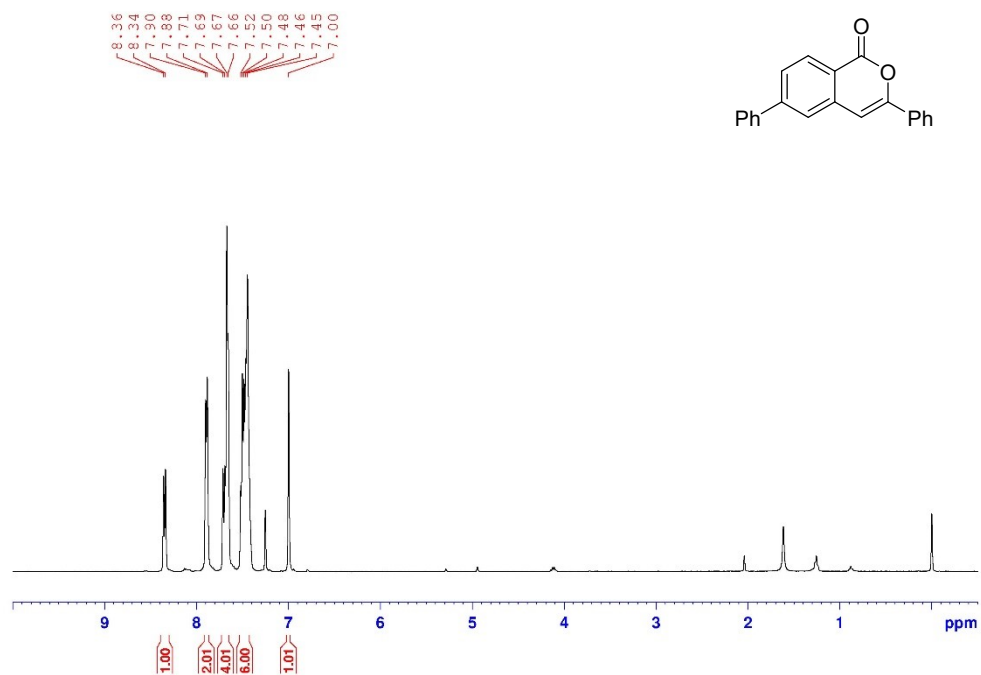

3ma, CDCl<sub>3</sub>, 150 MHz

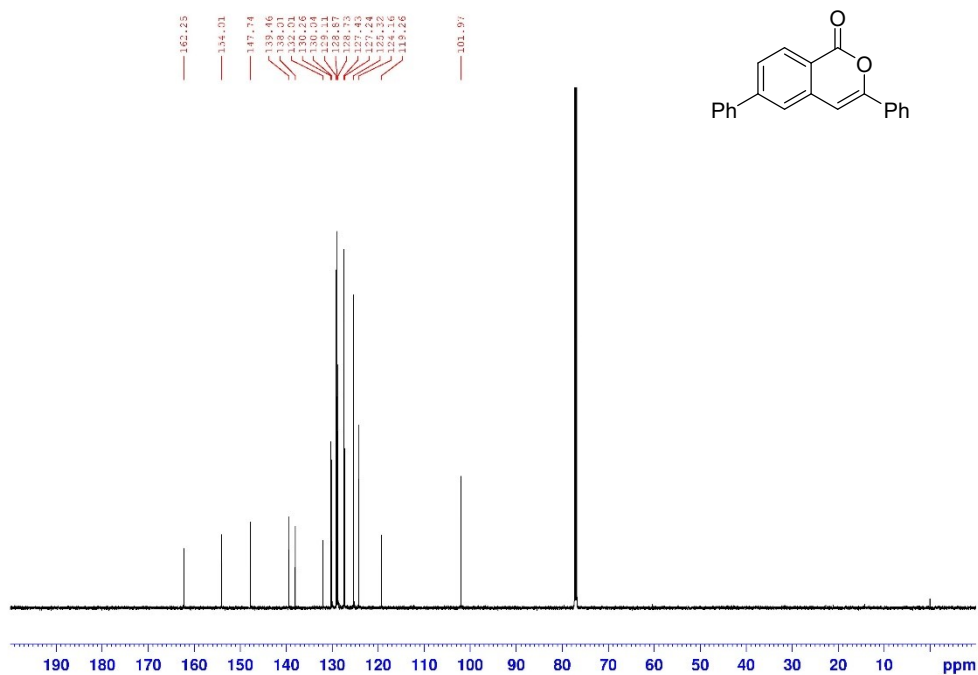

3na, CDCl<sub>3</sub>, 400 MHz

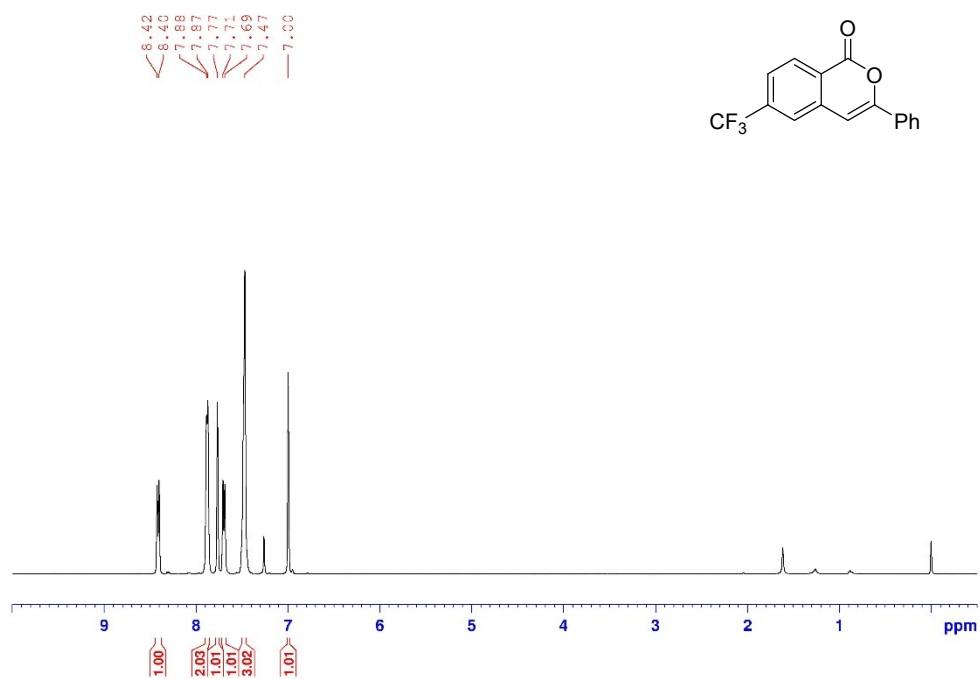

3na, CDCl<sub>3</sub>, 100 MHz

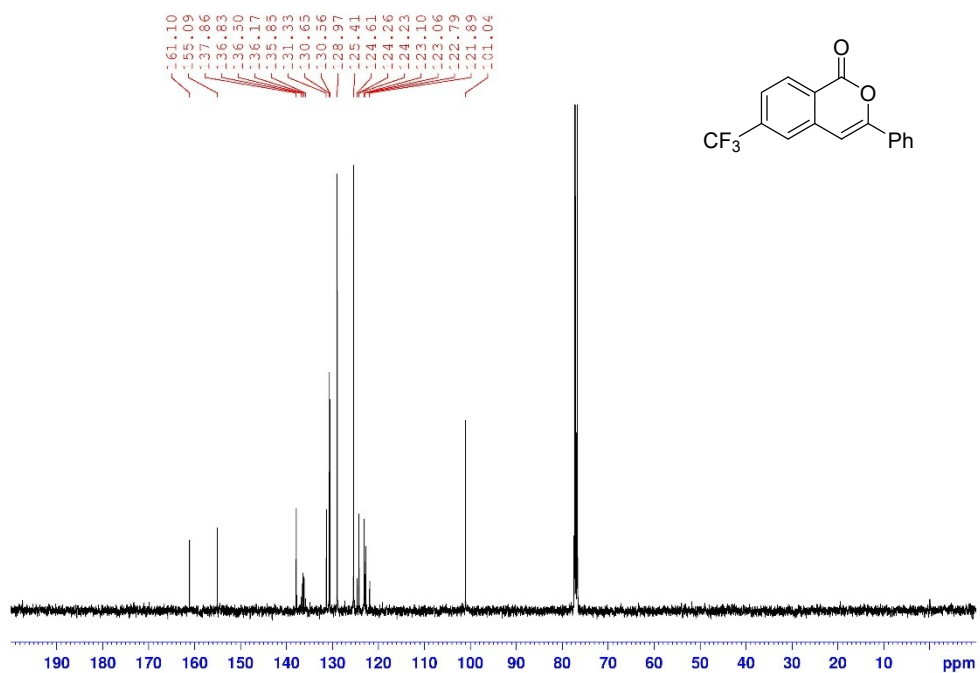



3na', CDCl<sub>3</sub>, 400 MHz

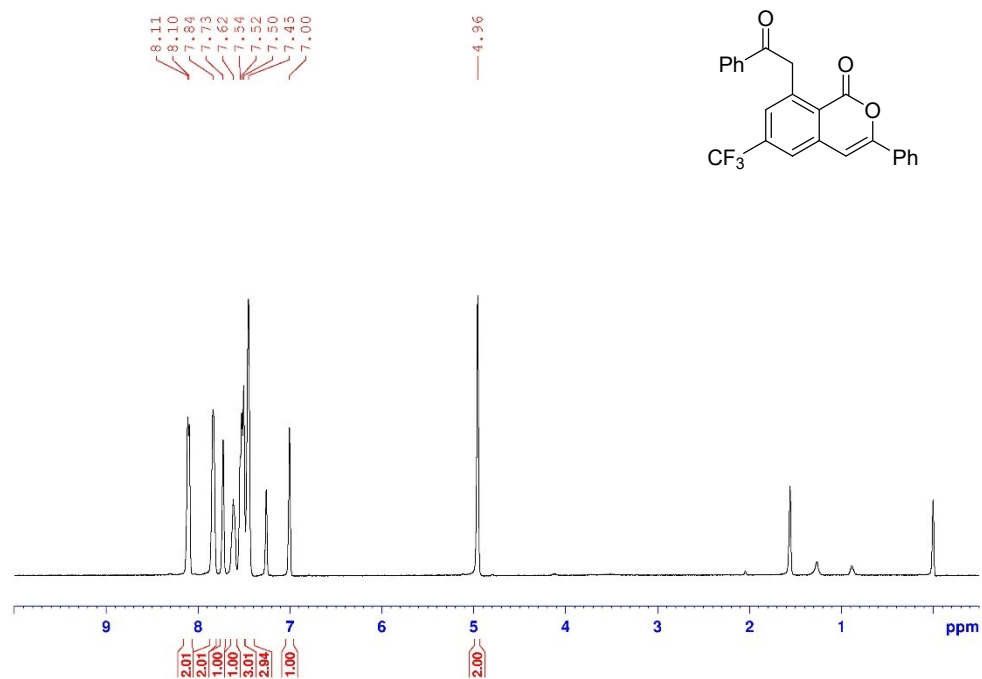

3na', CDCl<sub>3</sub>, 100 MHz

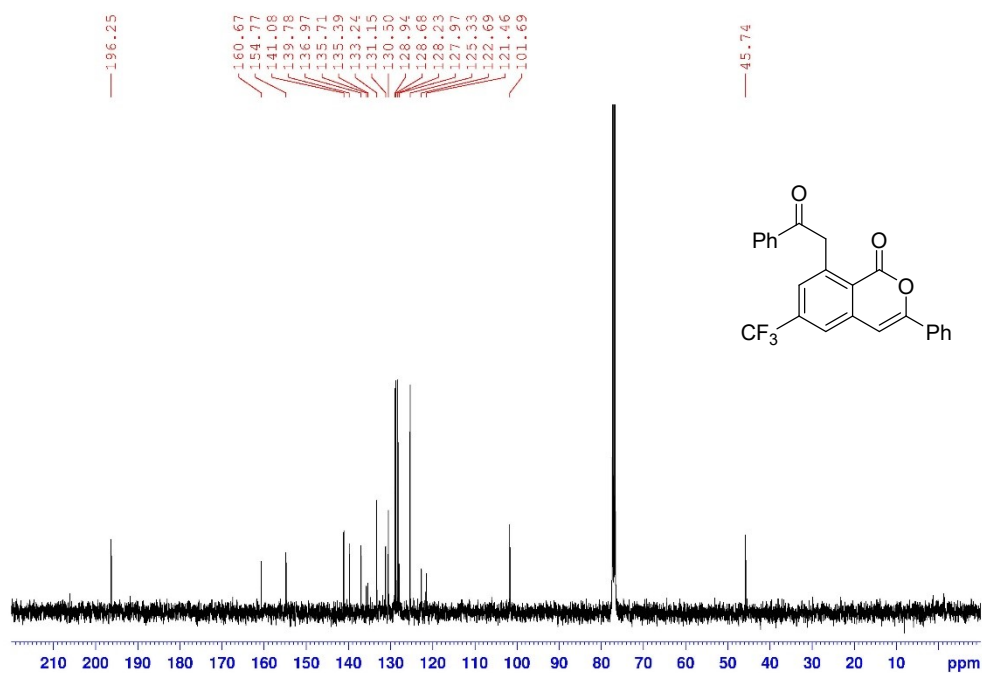

3oa, CDCl<sub>3</sub>, 400 MHz

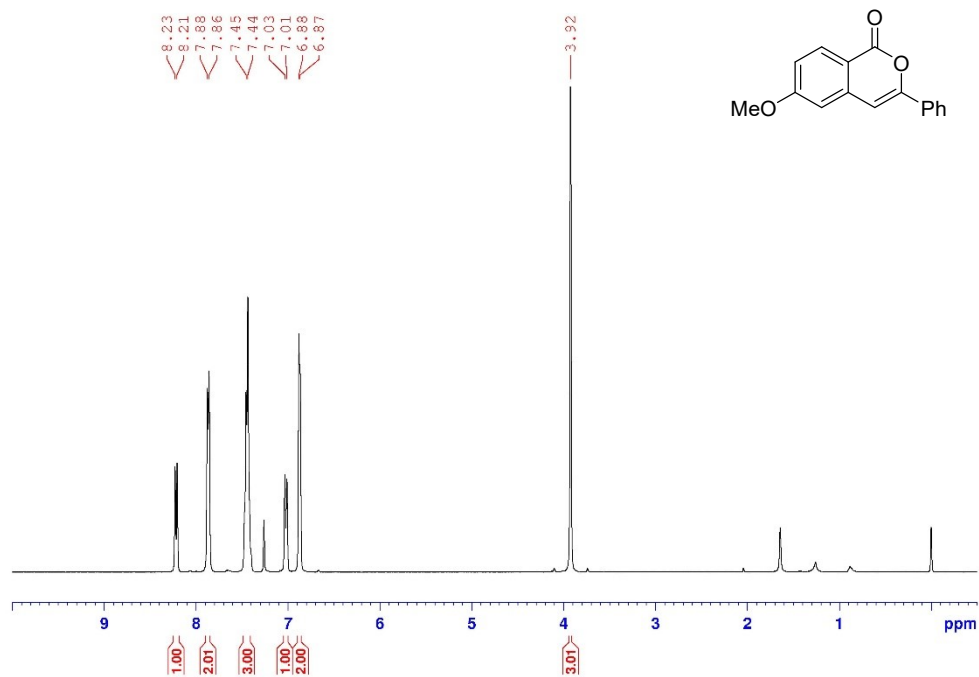

3oa, CDCl<sub>3</sub>, 100 MHz

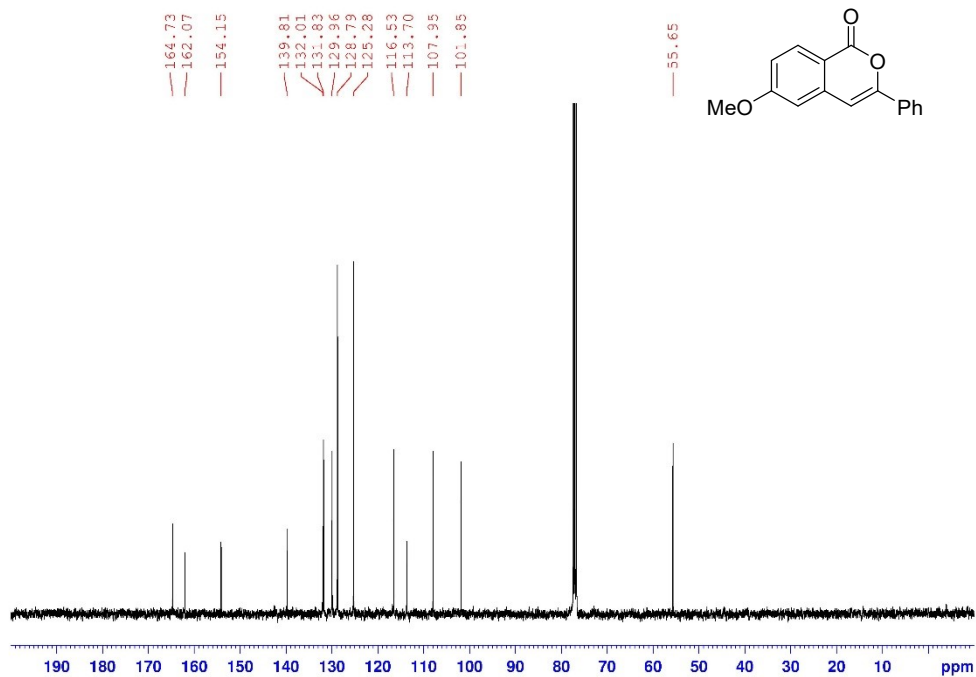

3oa', CDCl<sub>3</sub>, 400 MHz

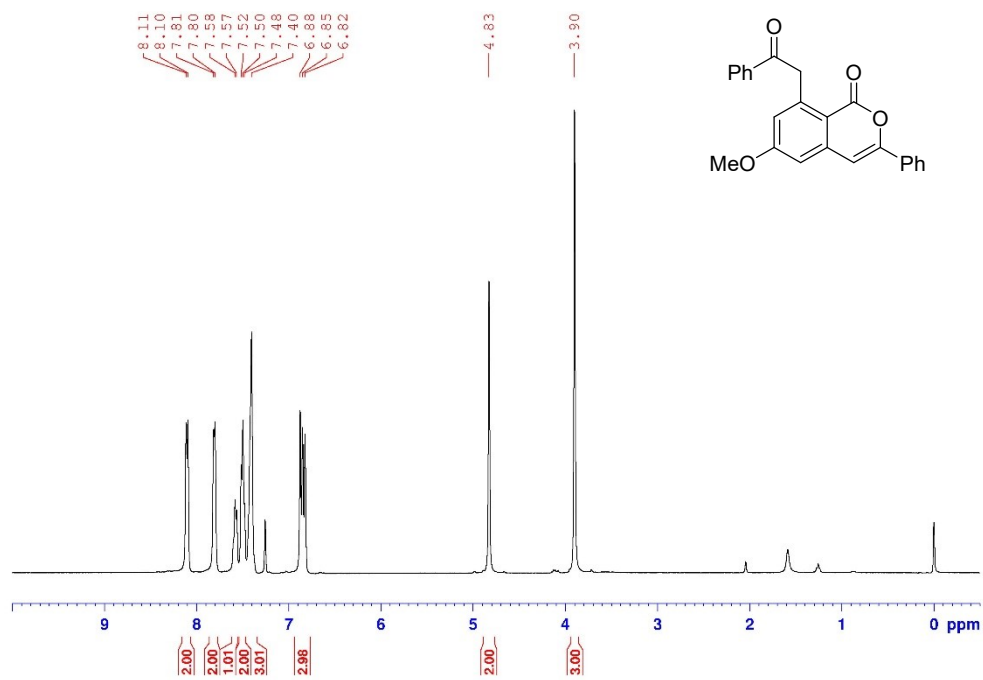

3oa', CDCl<sub>3</sub>, 100 MHz

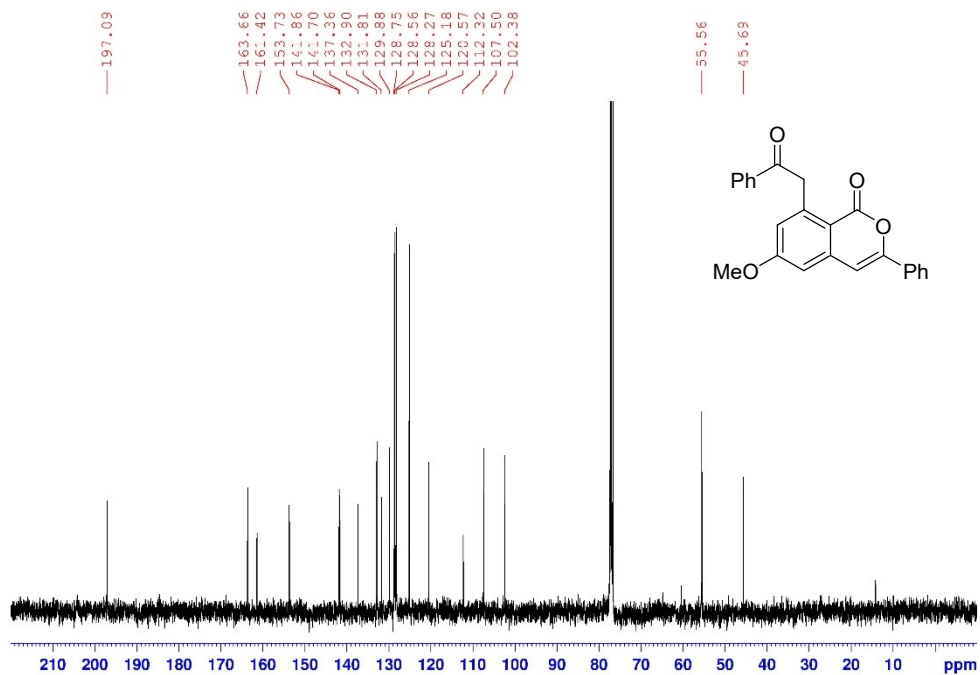

3pa, CDCl<sub>3</sub>, 400 MHz

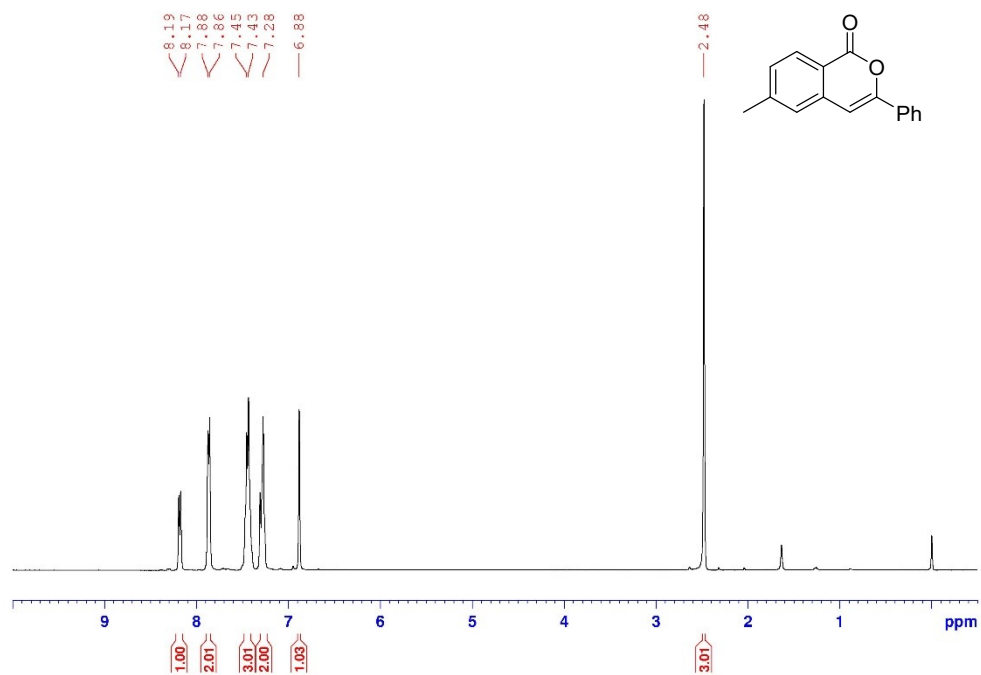

3pa, CDCl<sub>3</sub>, 100 MHz

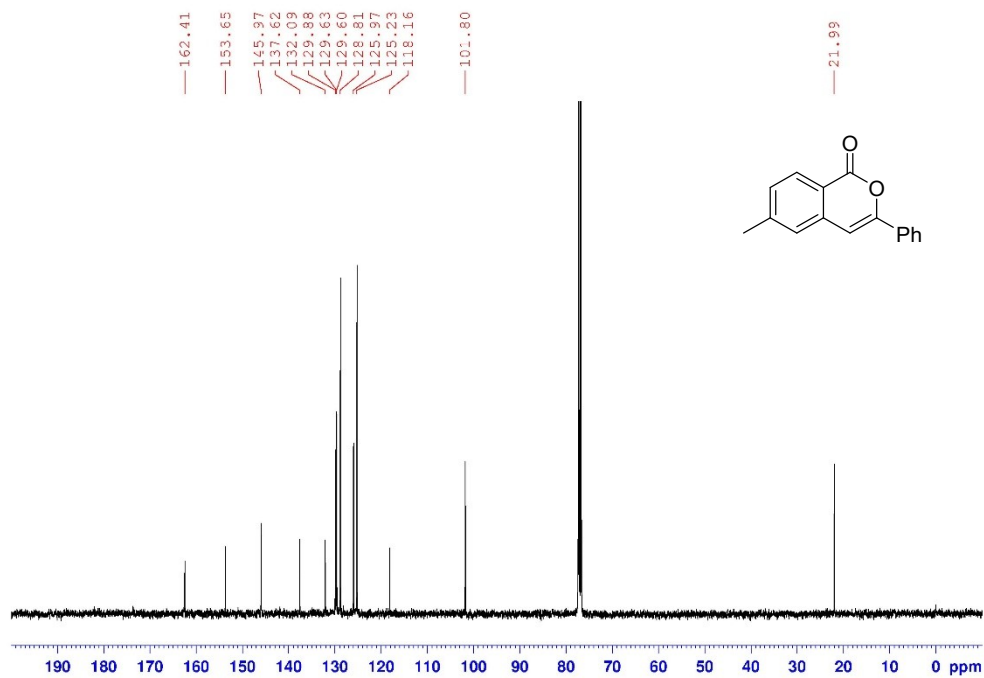

3pa', CDCl<sub>3</sub>, 400 MHz

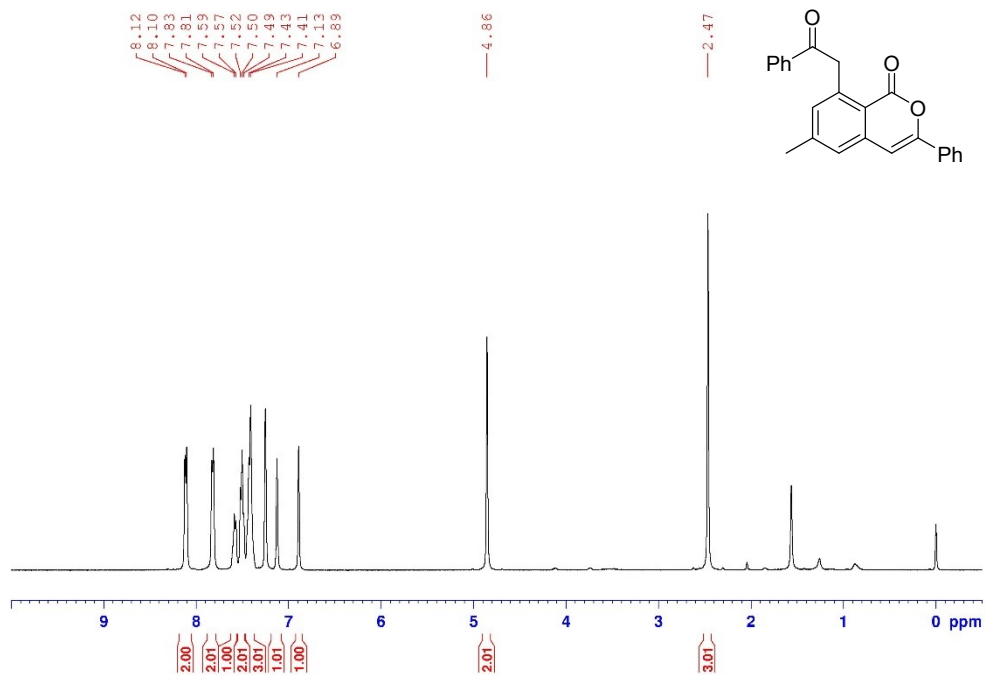

3pa', CDCl<sub>3</sub>, 100 MHz

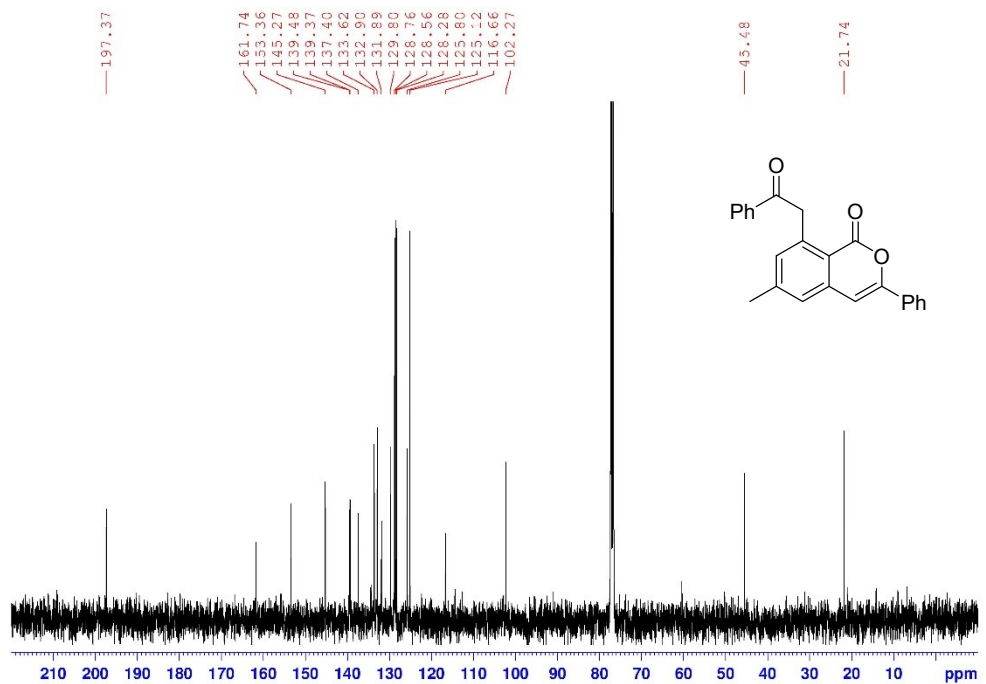

3qa, DMSO, 400 MHz

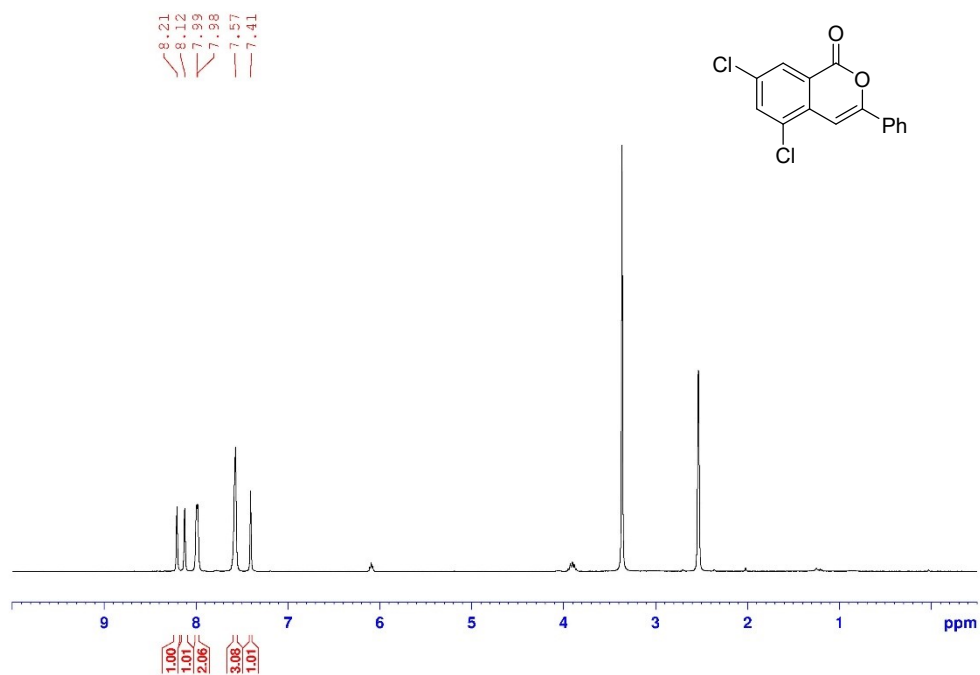

3qa, DMSO, 150 MHz

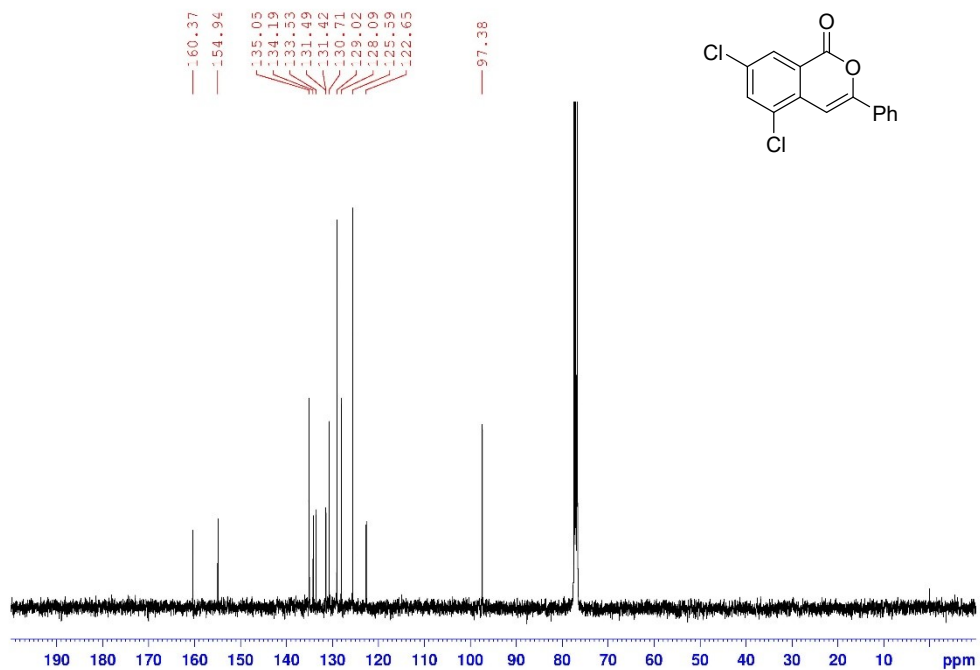

3ra, CDCl<sub>3</sub>, 400 MHz

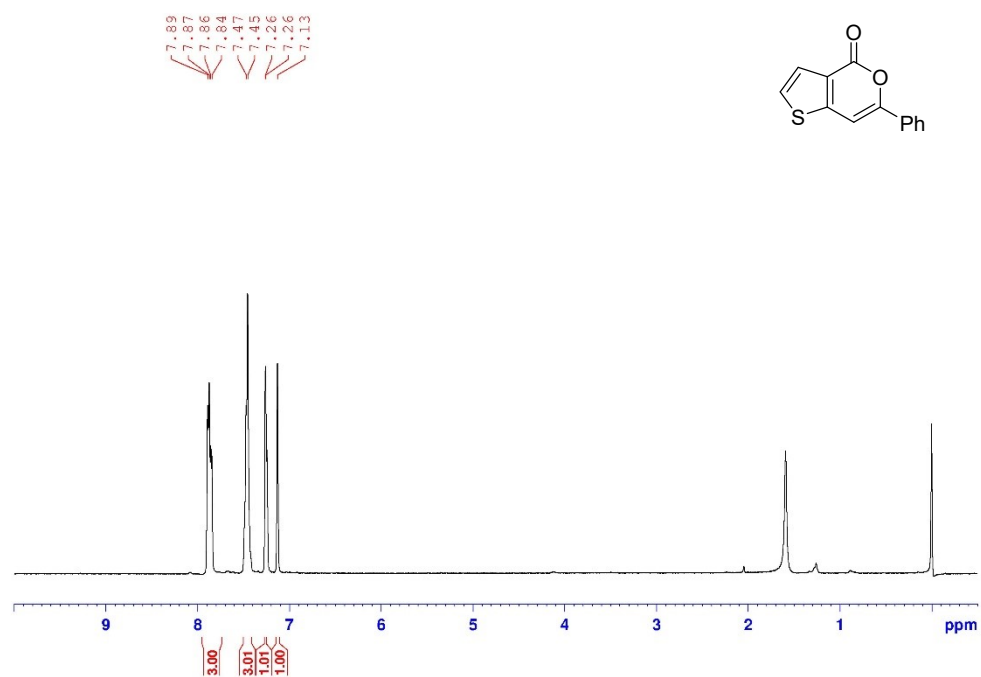

3ra, CDCl<sub>3</sub>, 100 MHz

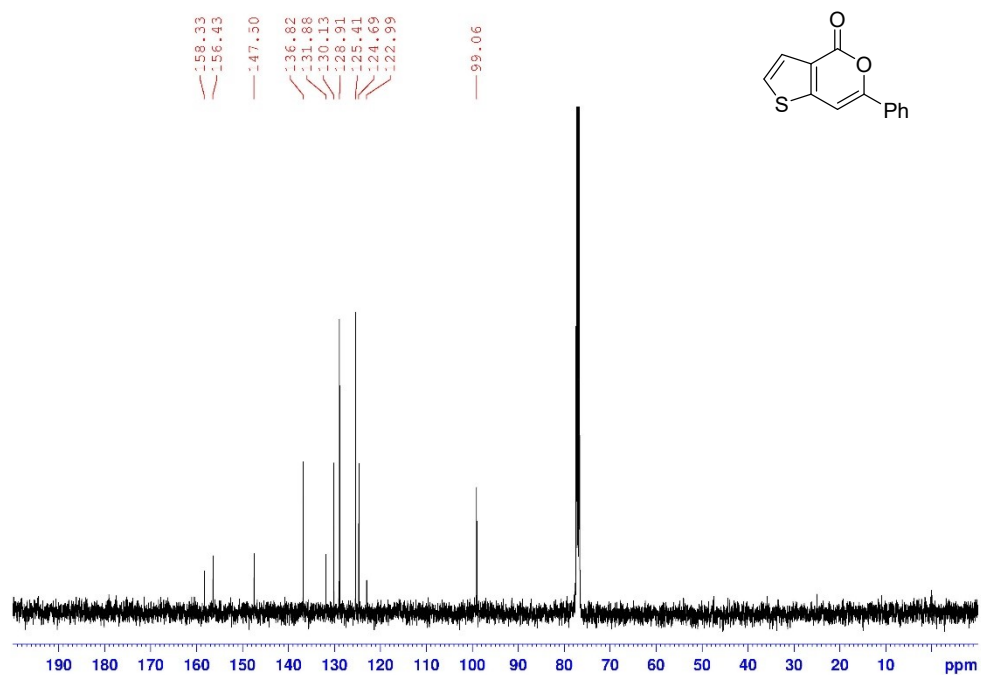

3sa, CDCl<sub>3</sub>, 400 MHz

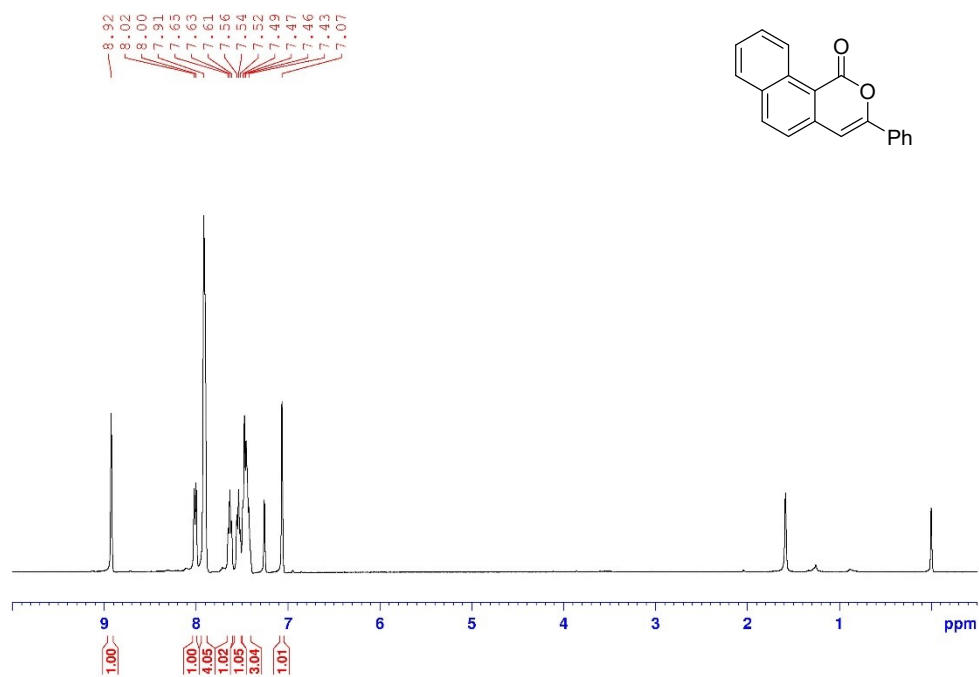

3sa, CDCl<sub>3</sub>, 100 MHz

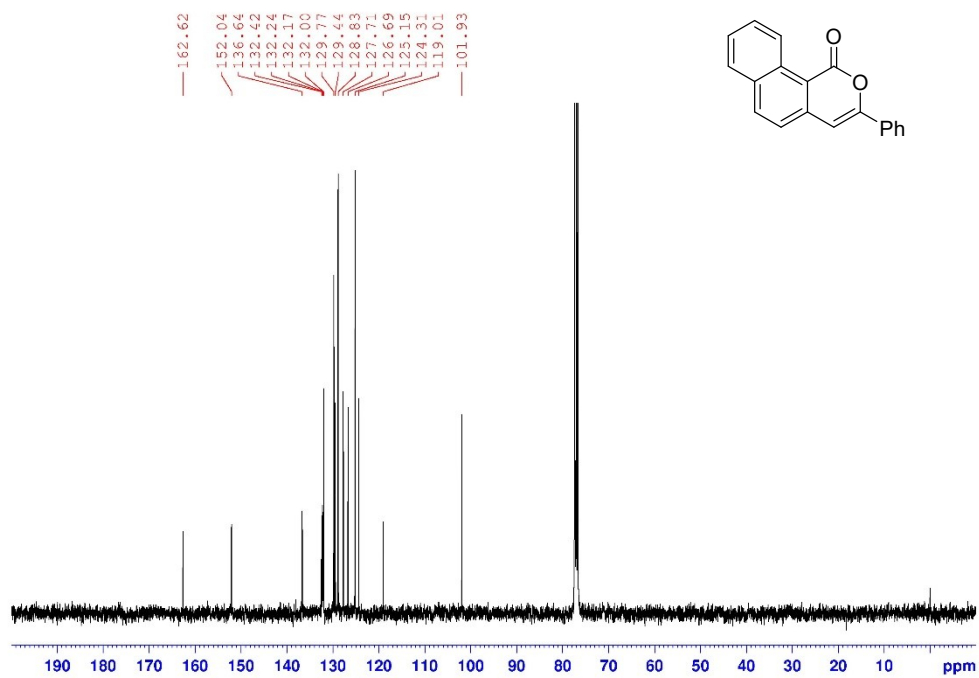



3ab, CDCl<sub>3</sub>, 400 MHz

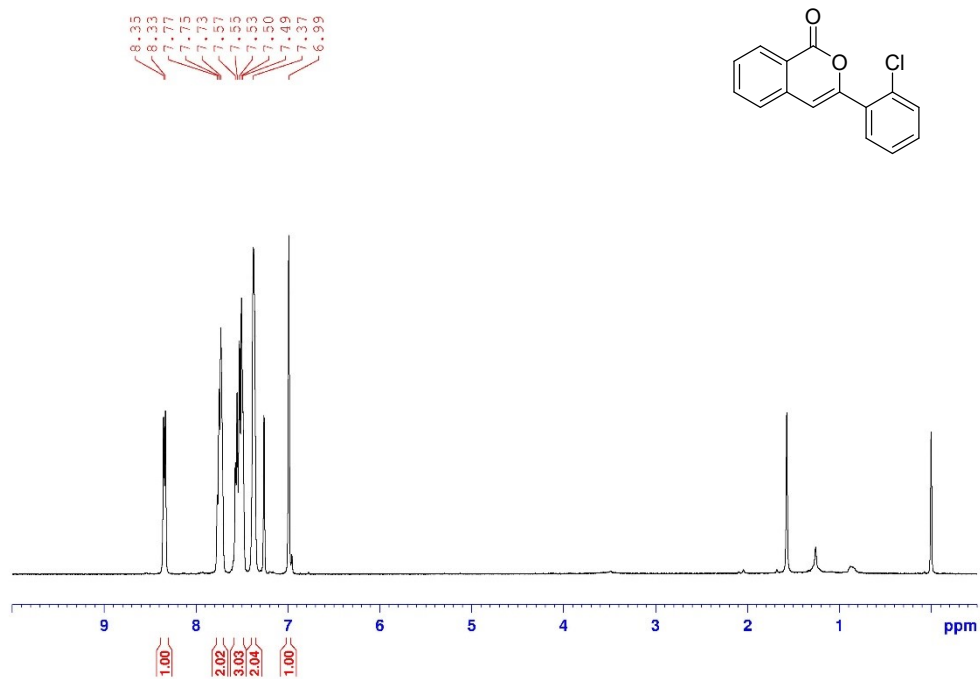

3ab, CDCl<sub>3</sub>, 100 MHz

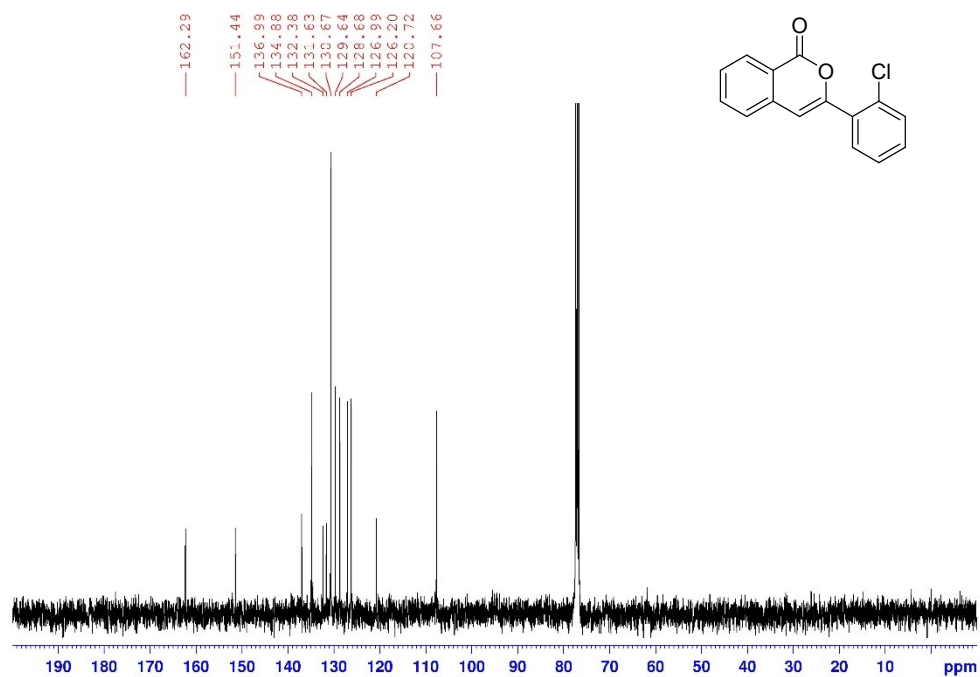

3ac, CDCl<sub>3</sub>, 400 MHz

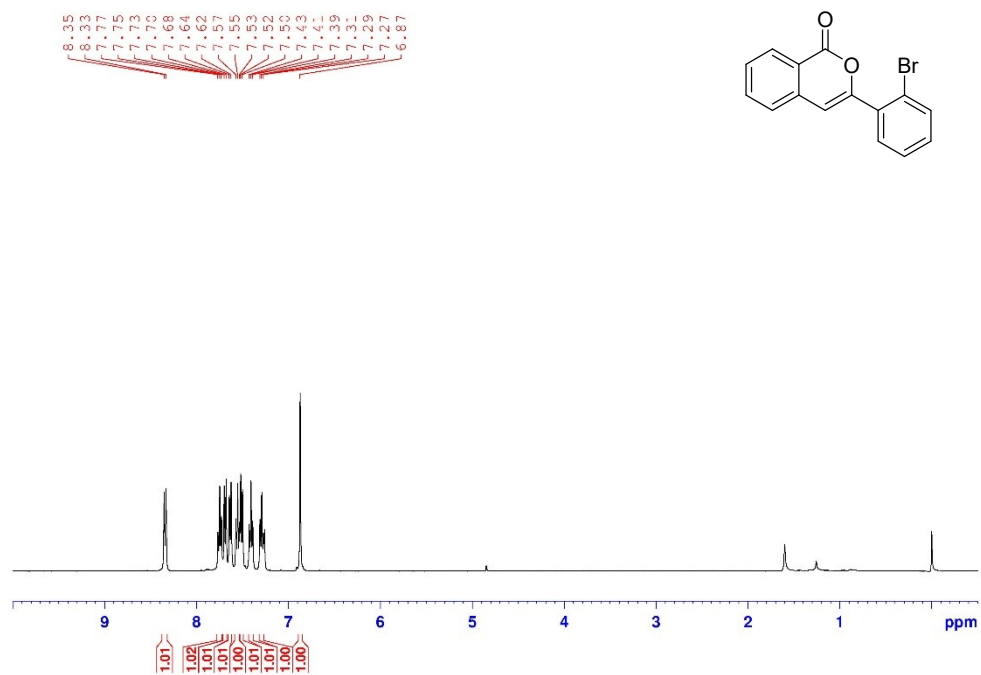

3ac, CDCl<sub>3</sub>, 150 MHz

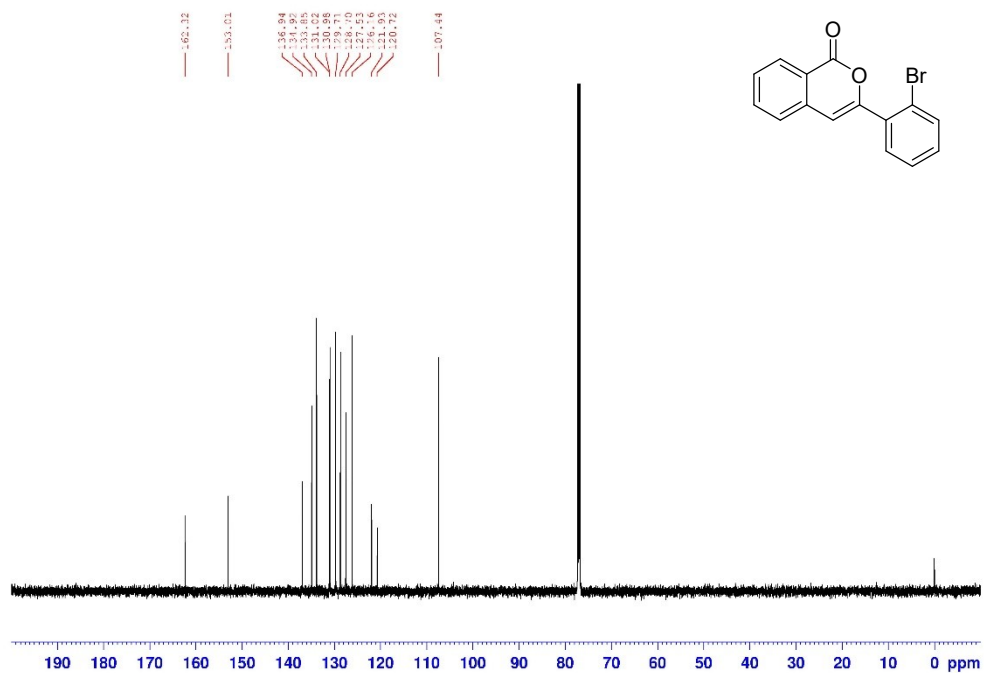

3ad, CDCl<sub>3</sub>, 400 MHz

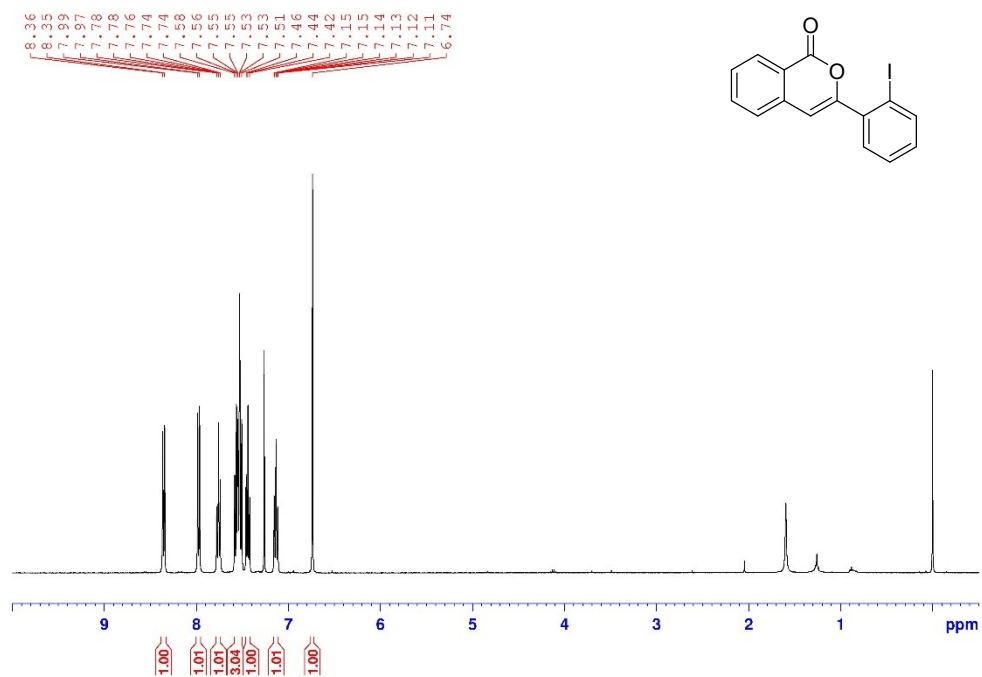

3ad, CDCl<sub>3</sub>, 150 MHz

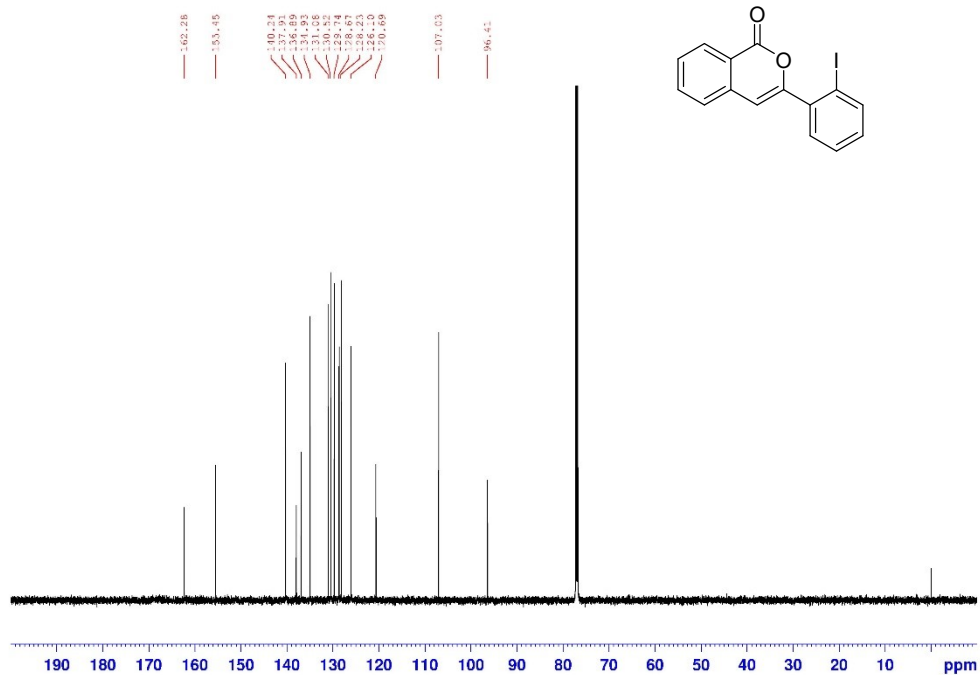

3ae, CDCl<sub>3</sub>, 400 MHz

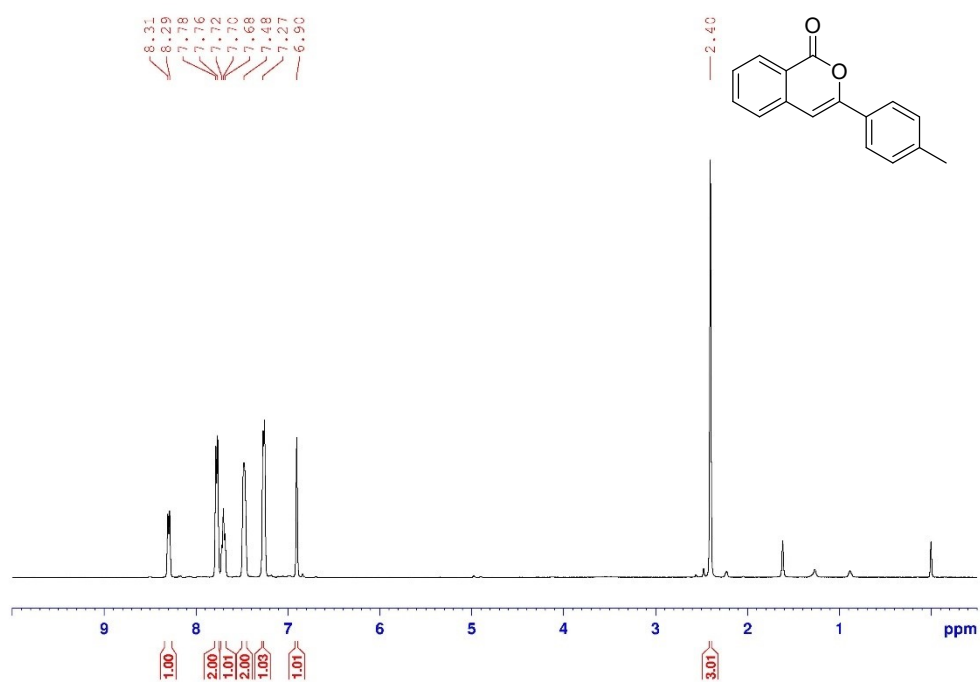

3ae, CDCl<sub>3</sub>, 100 MHz

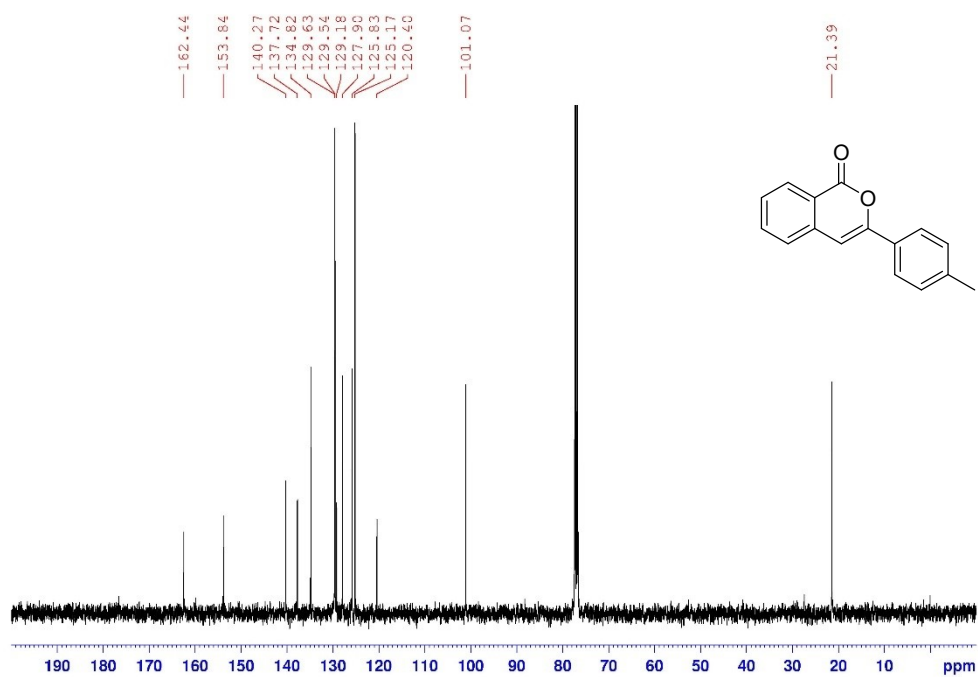

3af, CDCl<sub>3</sub>, 400 MHz

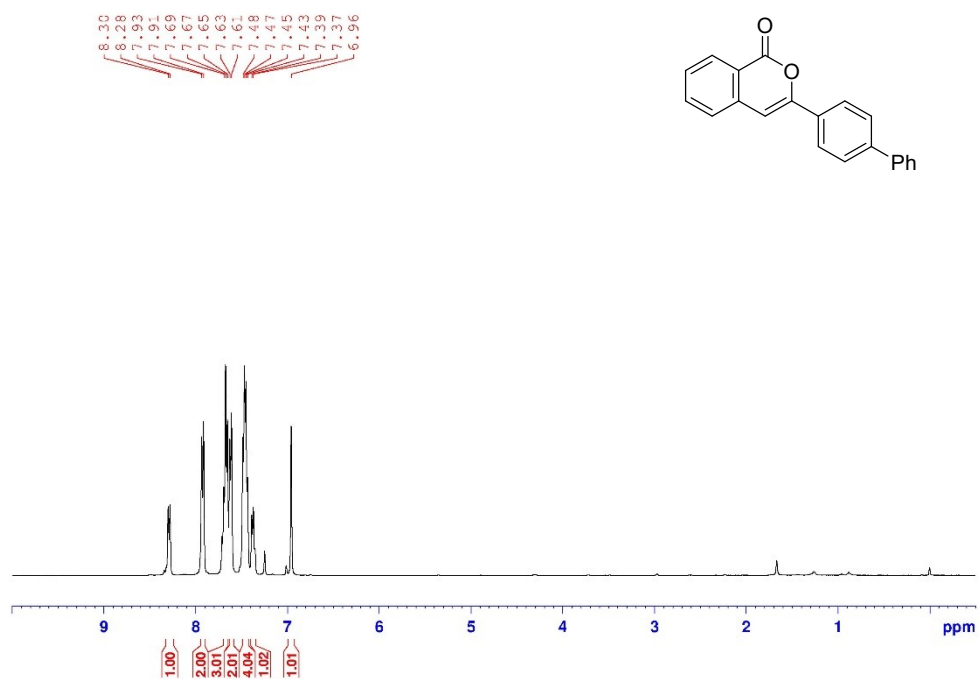

3af, CDCl<sub>3</sub>, 100 MHz

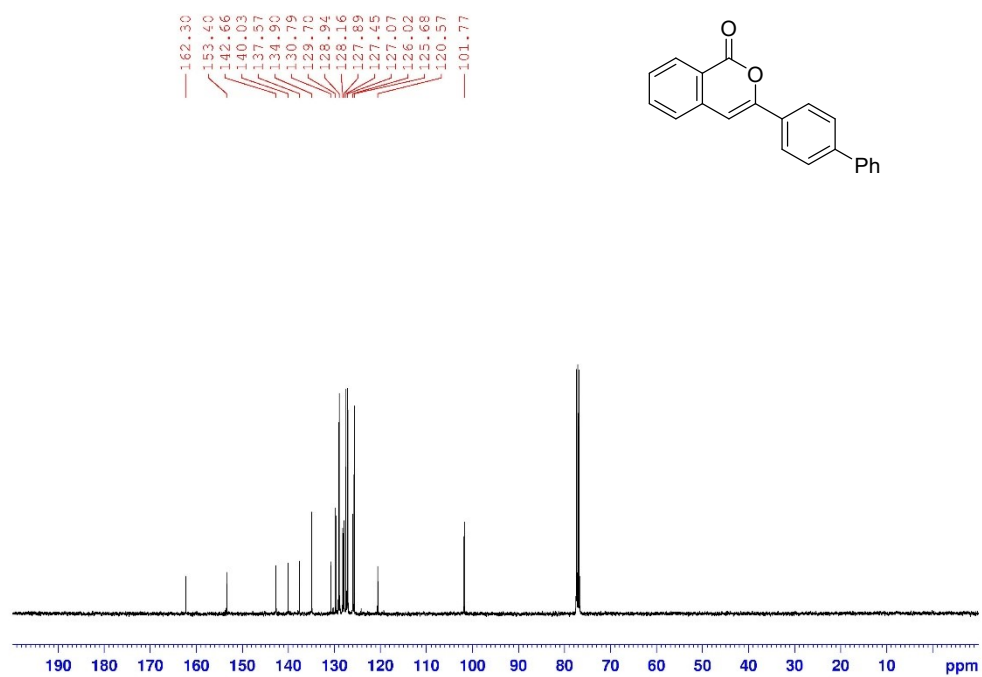

3ag, CDCl<sub>3</sub>, 400 MHz

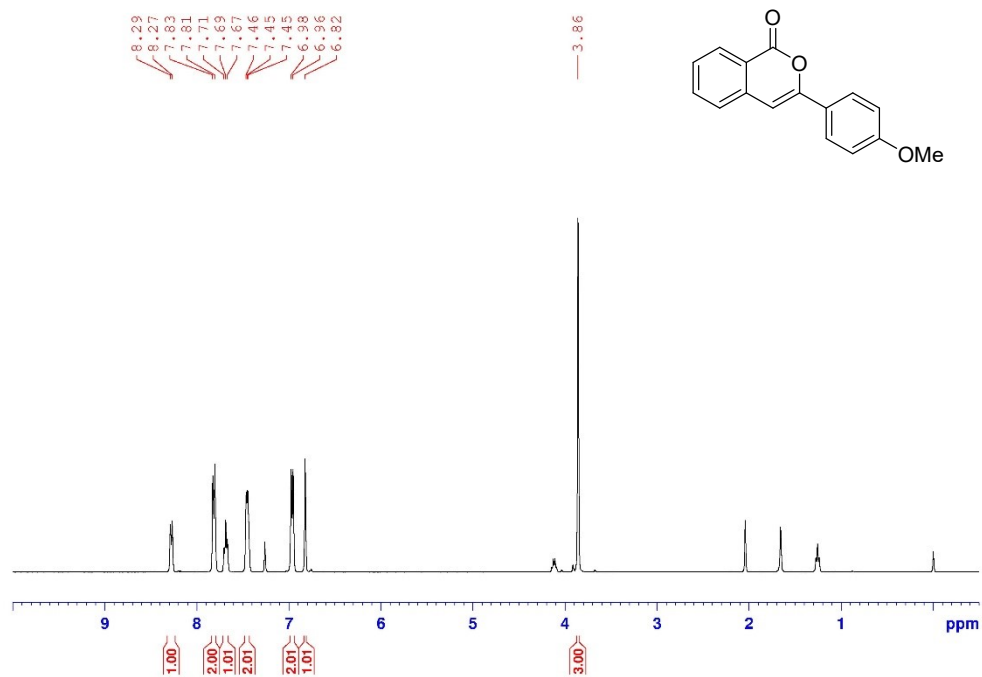

3ag, CDCl<sub>3</sub>, 100 MHz

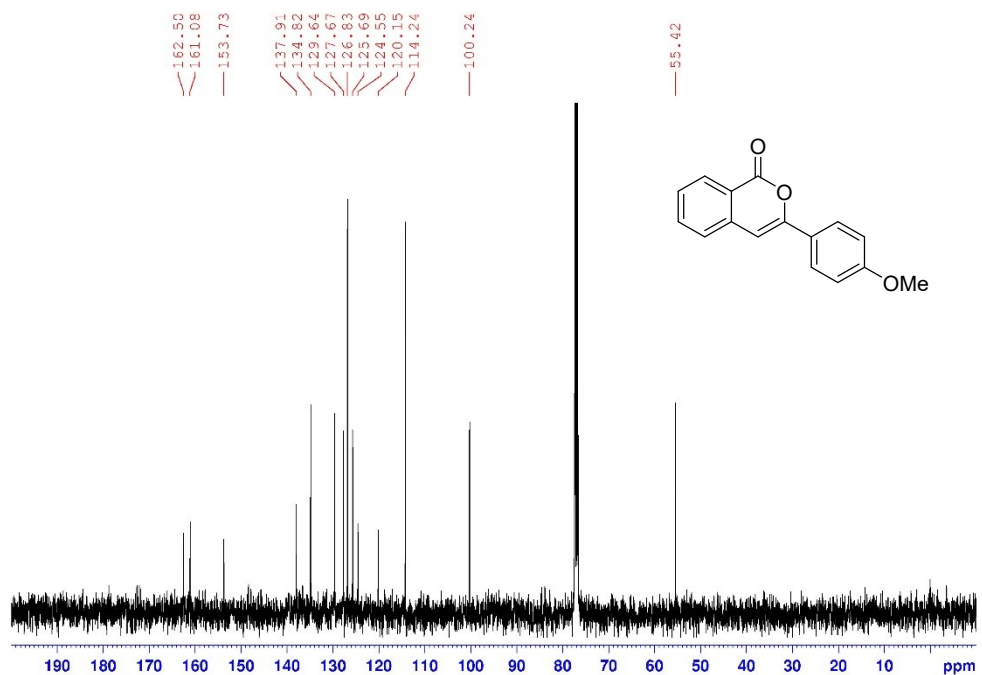

3ah, CDCl<sub>3</sub>, 400 MHz

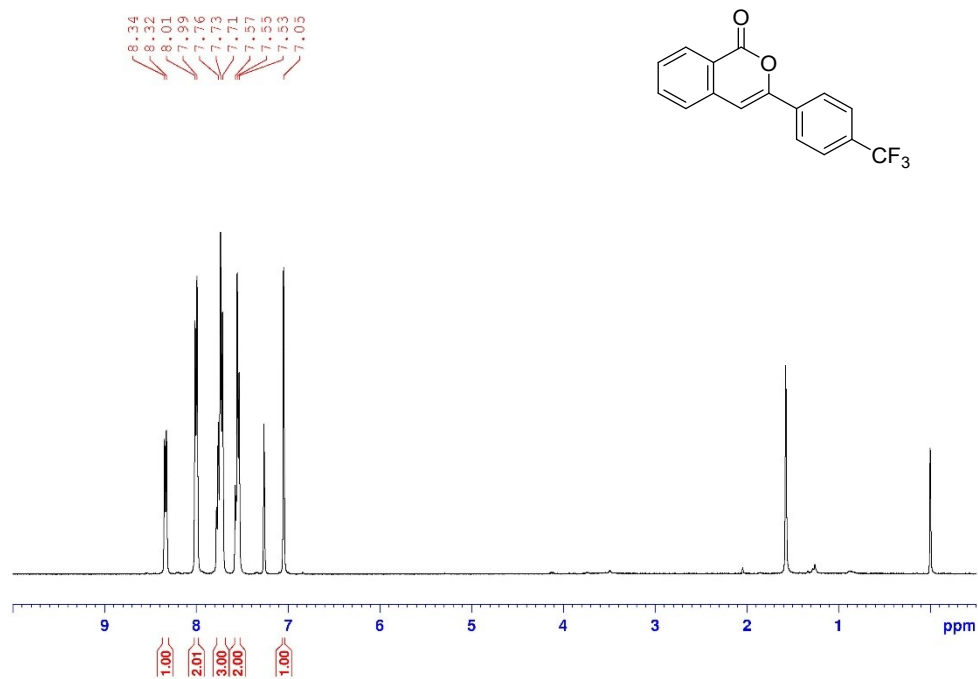

3ah, CDCl<sub>3</sub>, 100 MHz

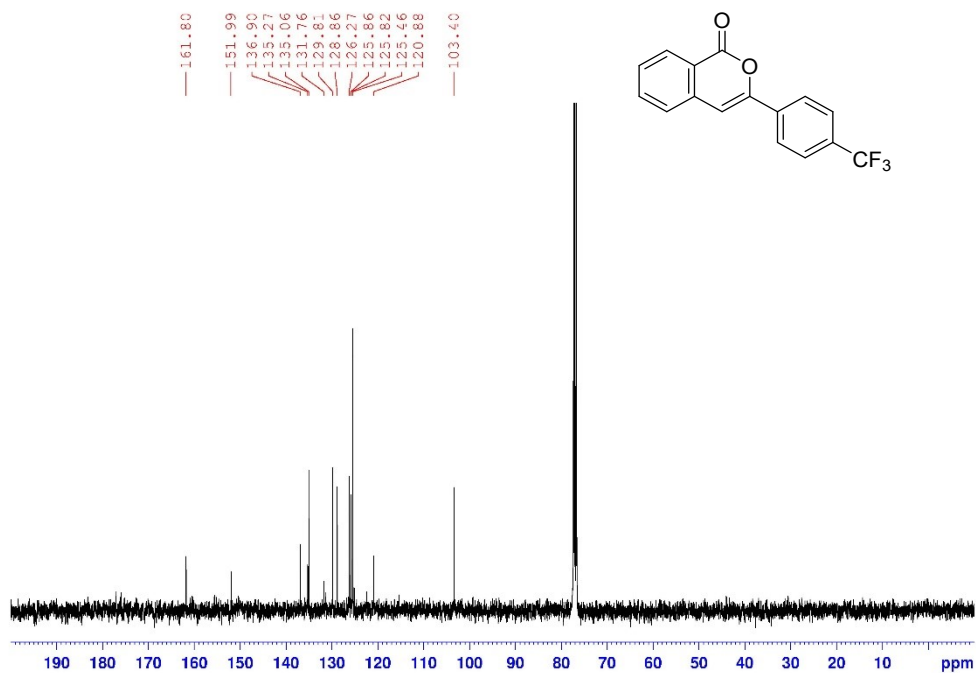

3ai, CDCl<sub>3</sub>, 400 MHz

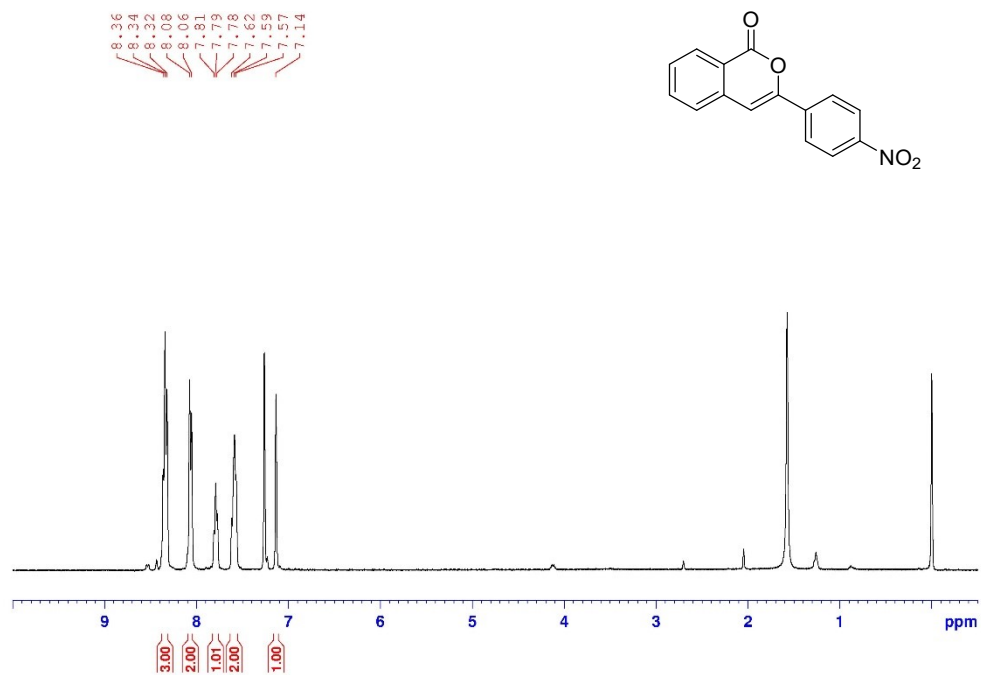

3ai, CDCl<sub>3</sub>, 100 MHz

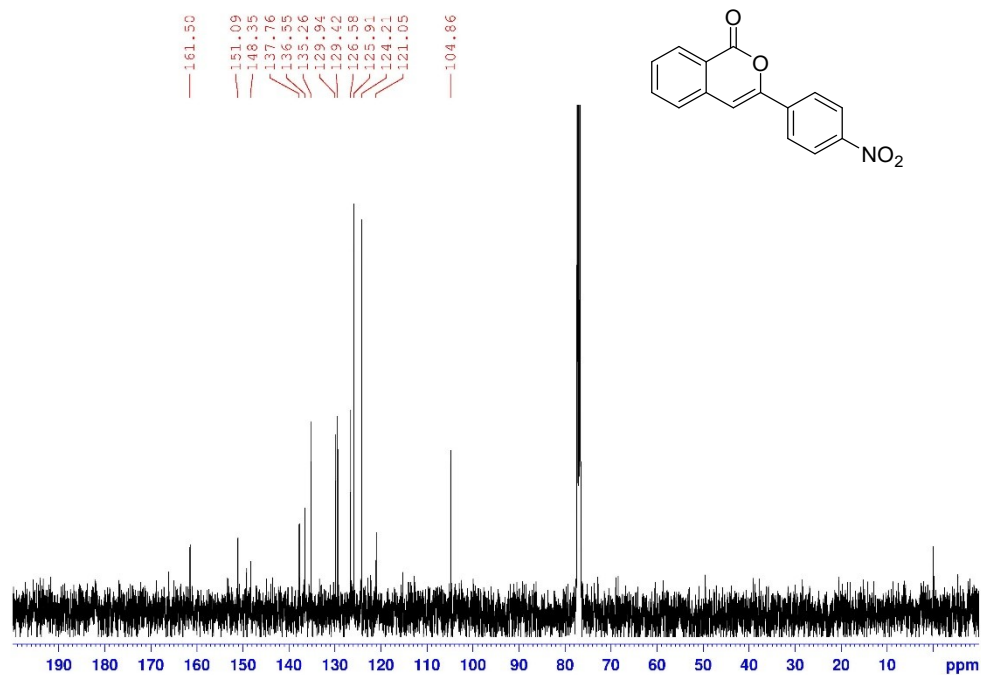



3aj, CDCl<sub>3</sub>, 400 MHz

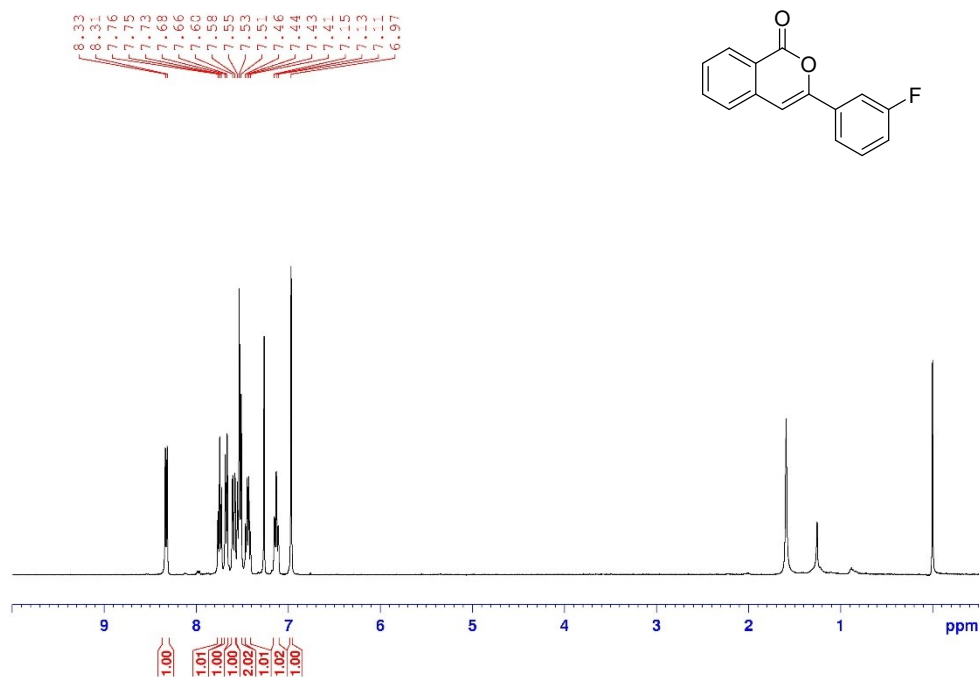

3aj, CDCl<sub>3</sub>, 100 MHz

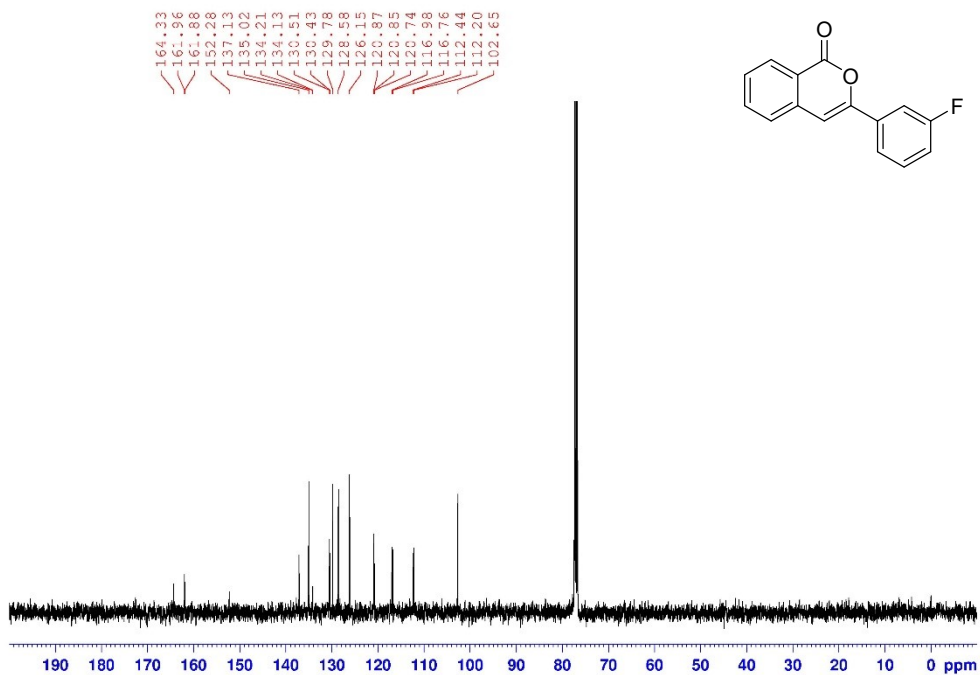

3ak, CDCl<sub>3</sub>, 400 MHz

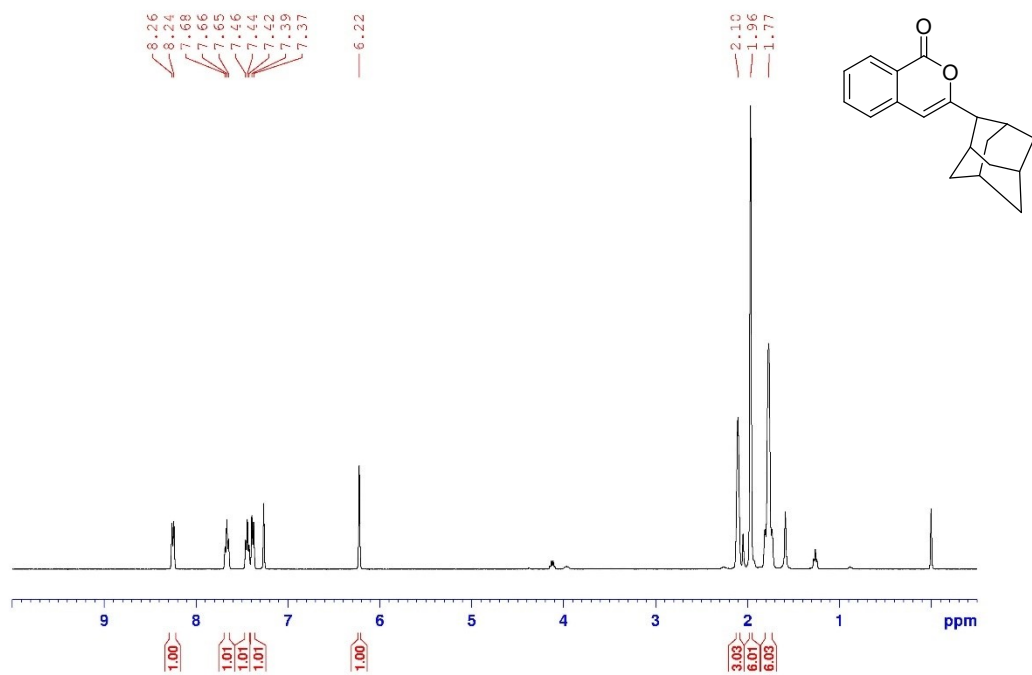

3ak, CDCl<sub>3</sub>, 100 MHz

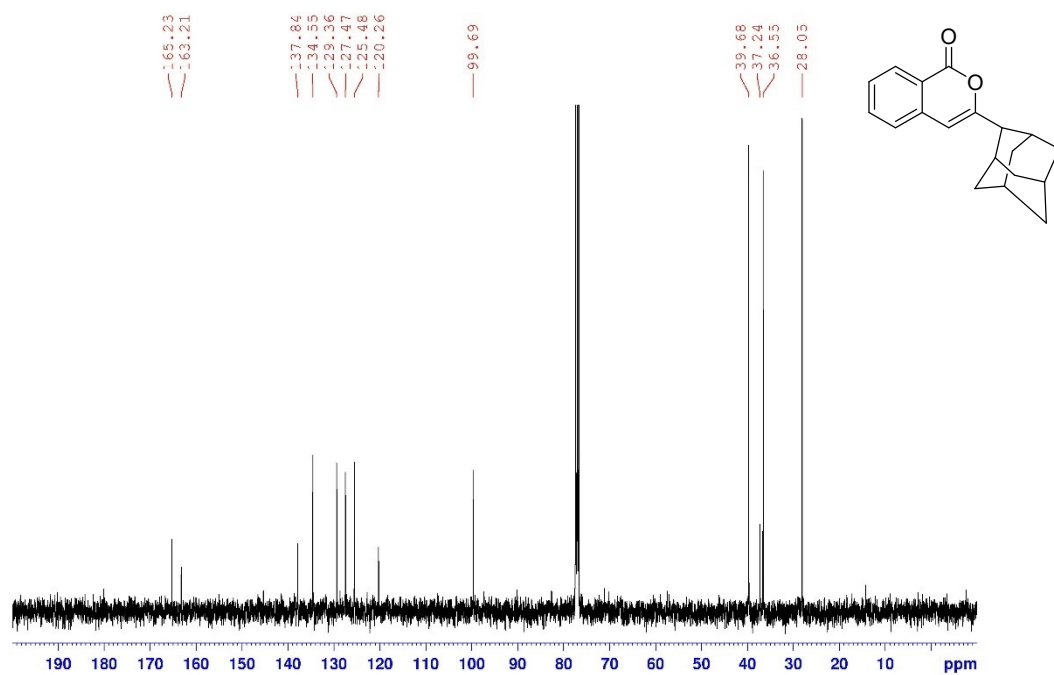

3a1, CDCl<sub>3</sub>, 400 MHz

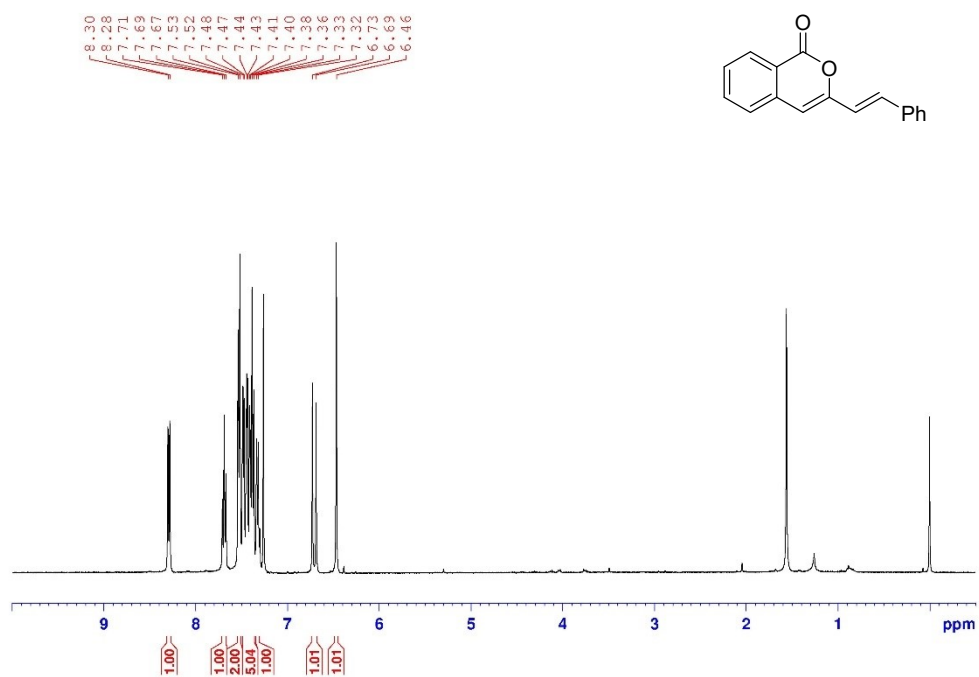

3a1, CDCl<sub>3</sub>, 100 MHz

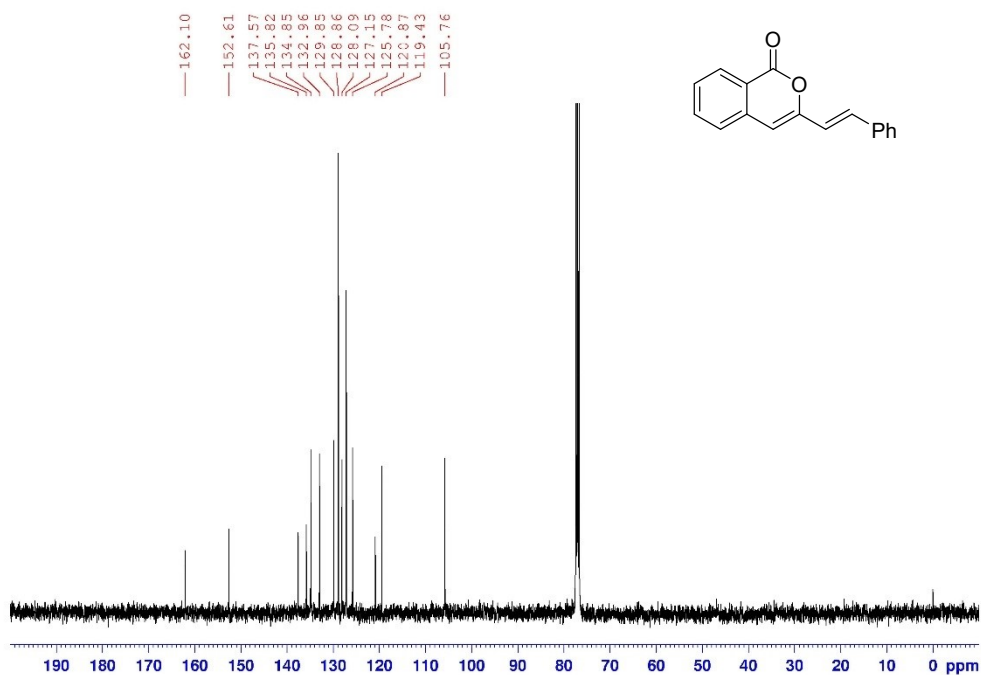

3am, CDCl<sub>3</sub>, 400 MHz

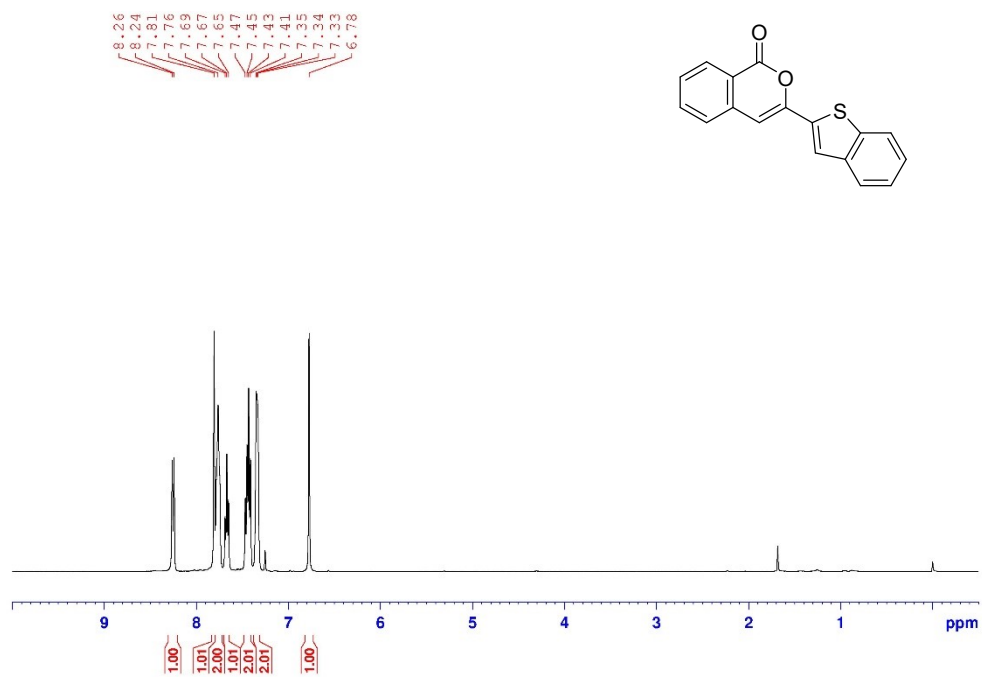

3am, CDCl<sub>3</sub>, 100 MHz

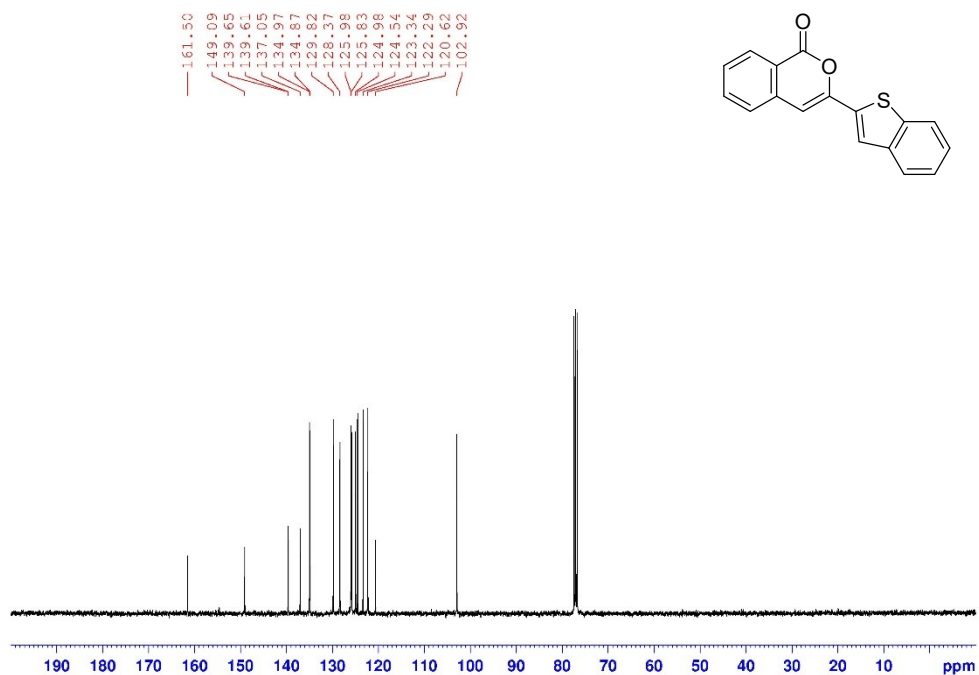

3an, CDCl<sub>3</sub>, 400 MHz

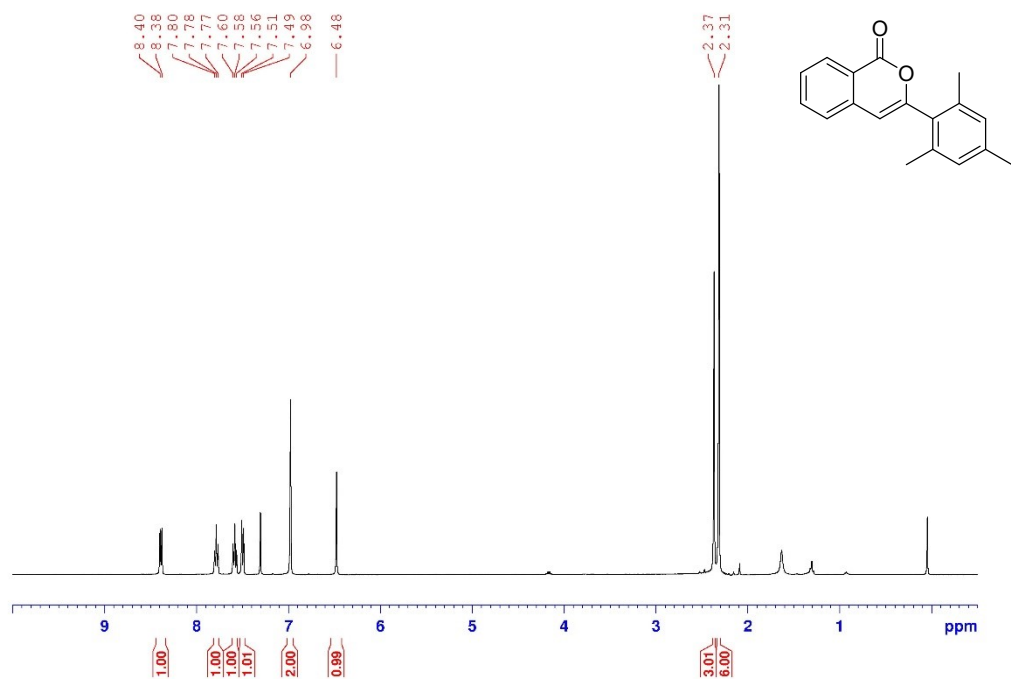

3an, CDCl<sub>3</sub>, 100 MHz

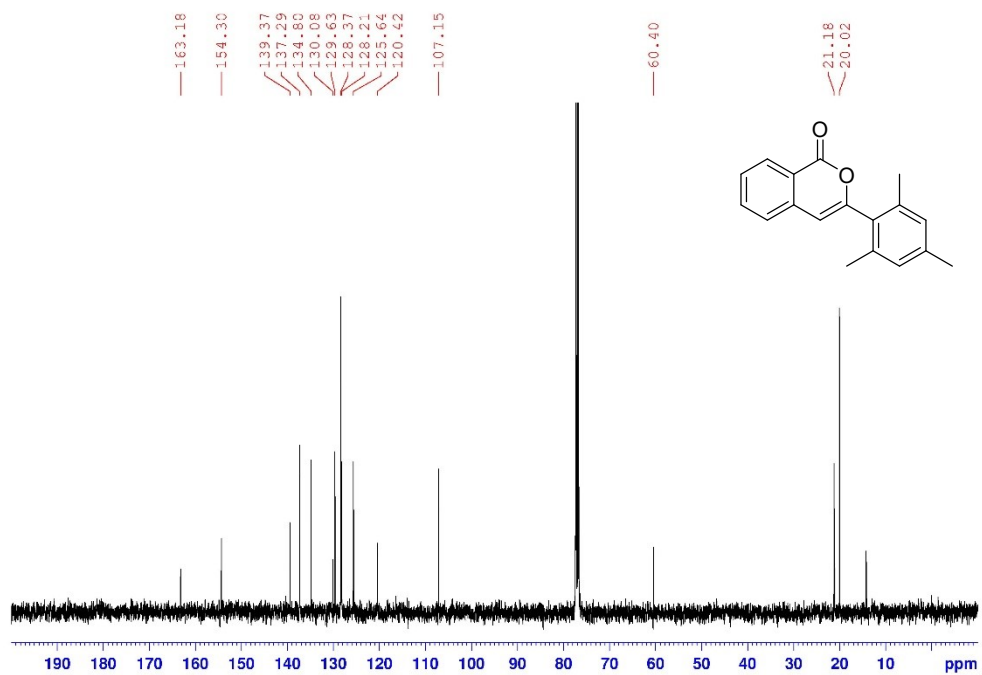

3ao, CDCl<sub>3</sub>, 400 MHz

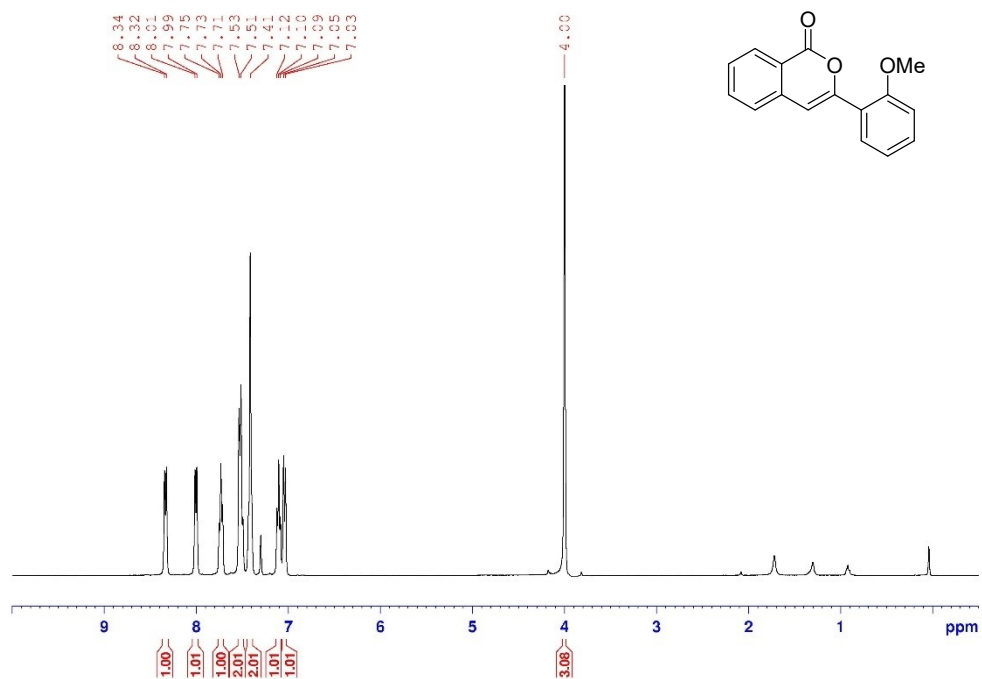

3ao, CDCl<sub>3</sub>, 100 MHz

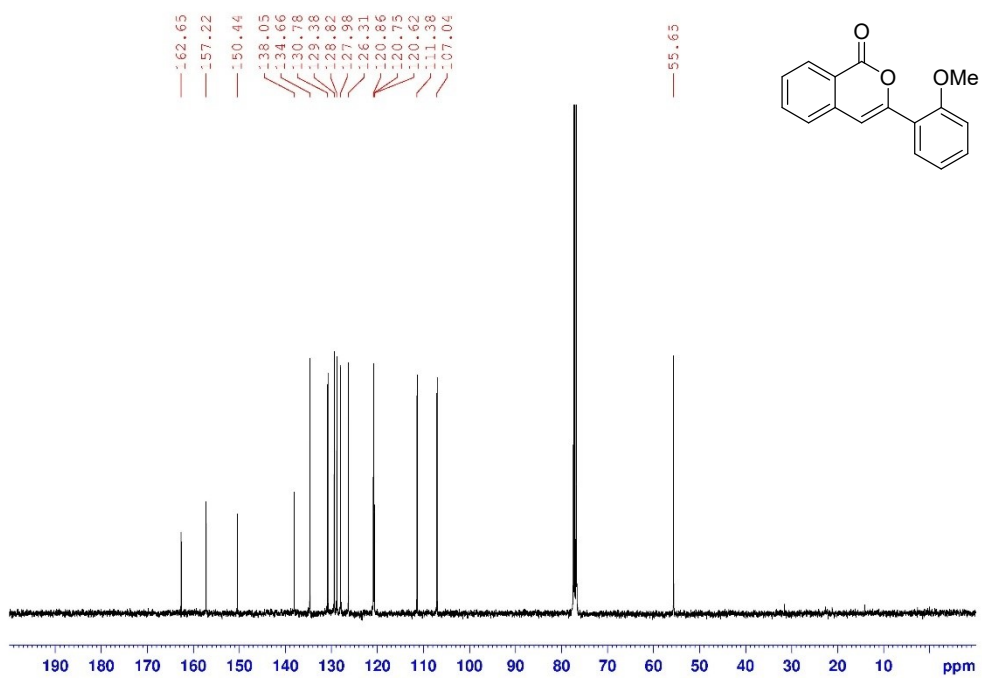

3ao', CDCl<sub>3</sub>, 400 MHz

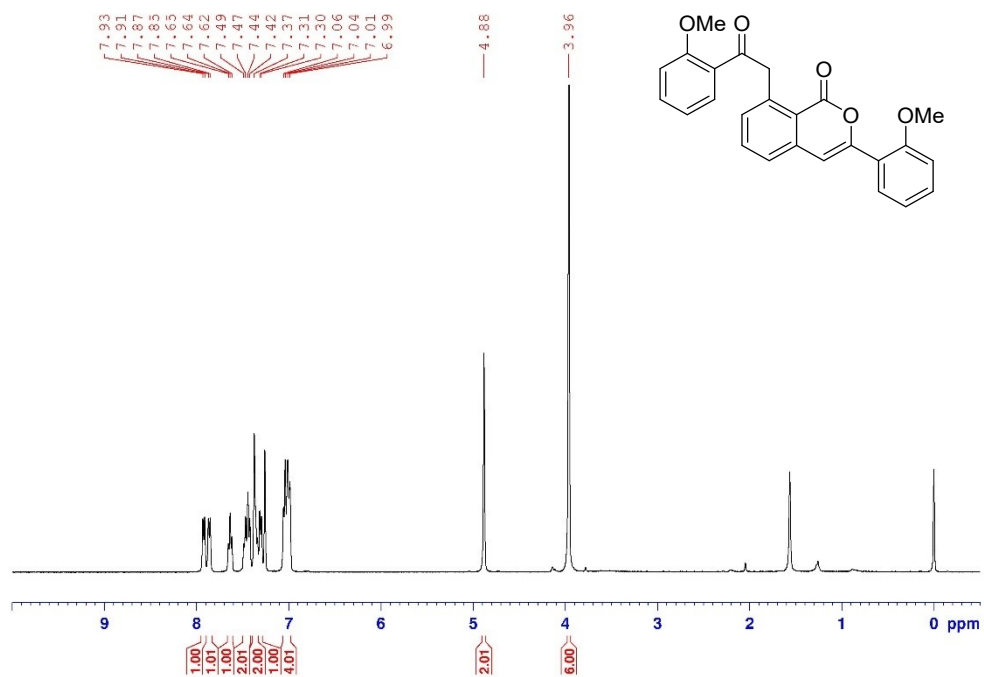

3ao', CDCl<sub>3</sub>, 100 MHz

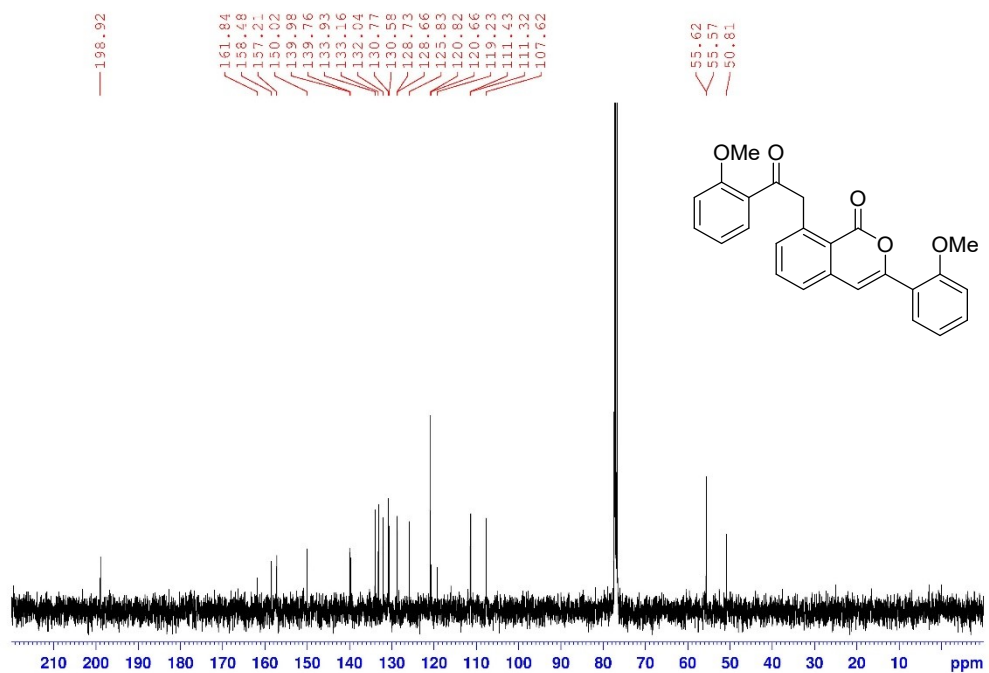

3ap, CDCl<sub>3</sub>, 400 MHz

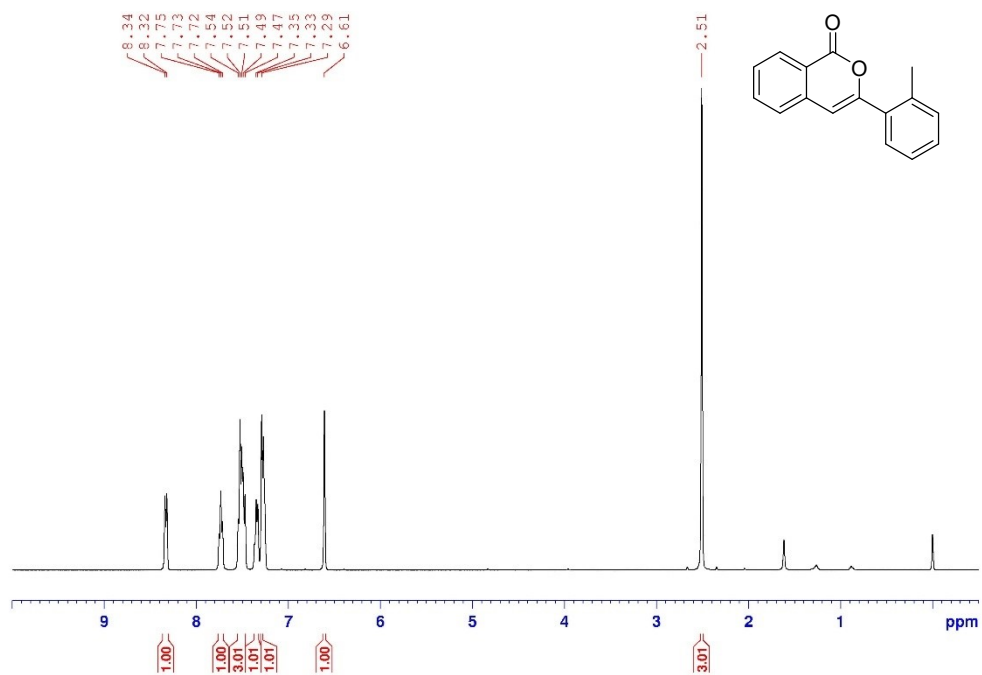

3ap, CDCl<sub>3</sub>, 100 MHz

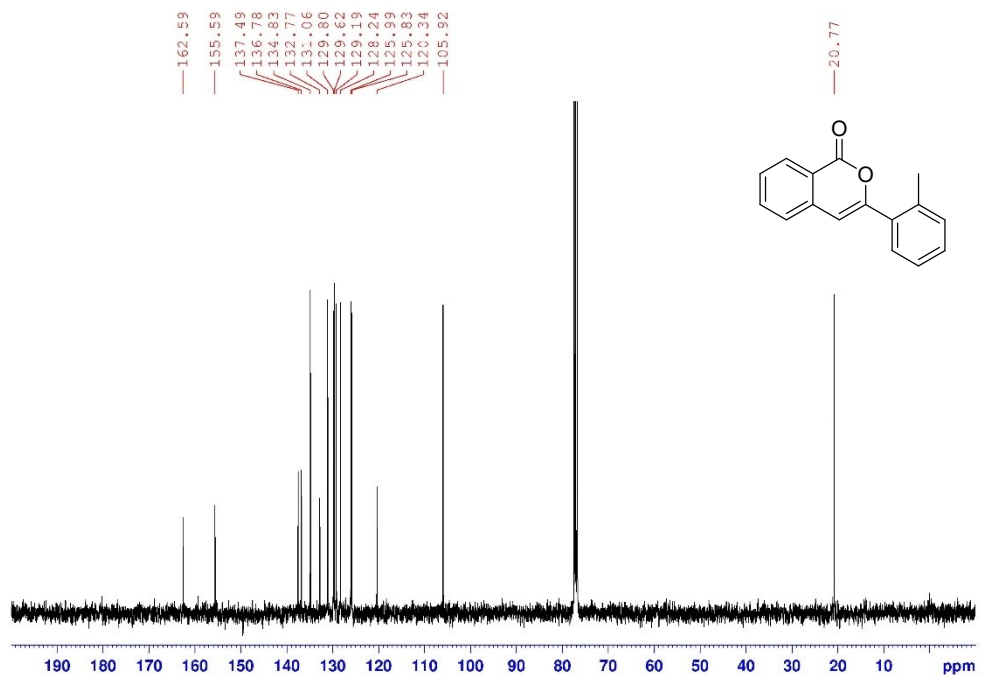



3ap', CDCl<sub>3</sub>, 400 MHz

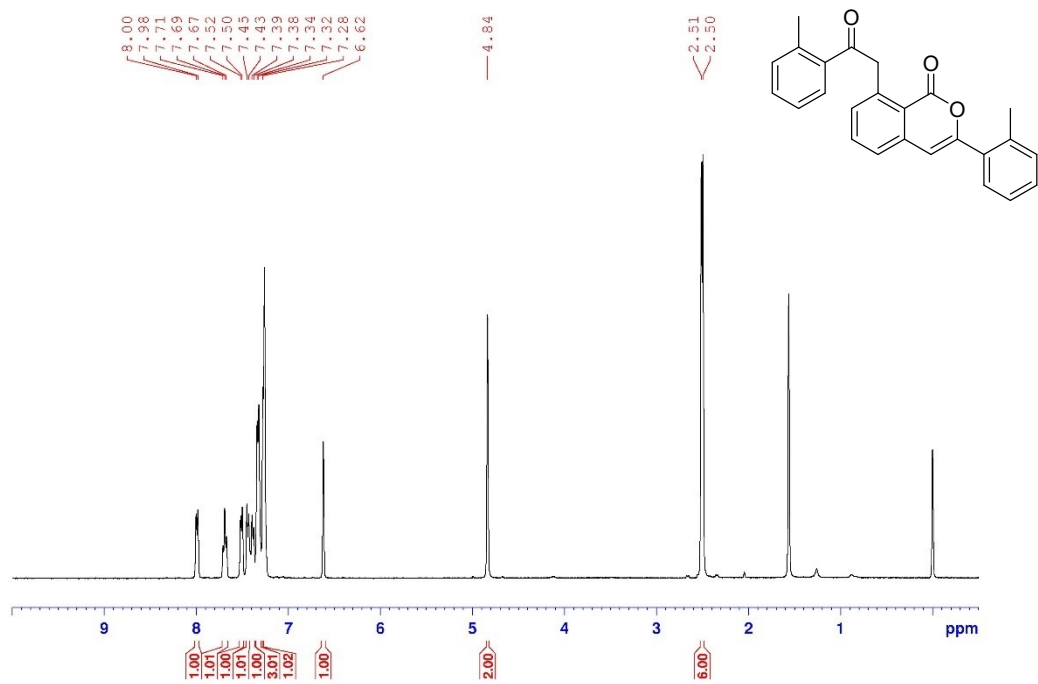

3ap', CDCl<sub>3</sub>, 100 MHz

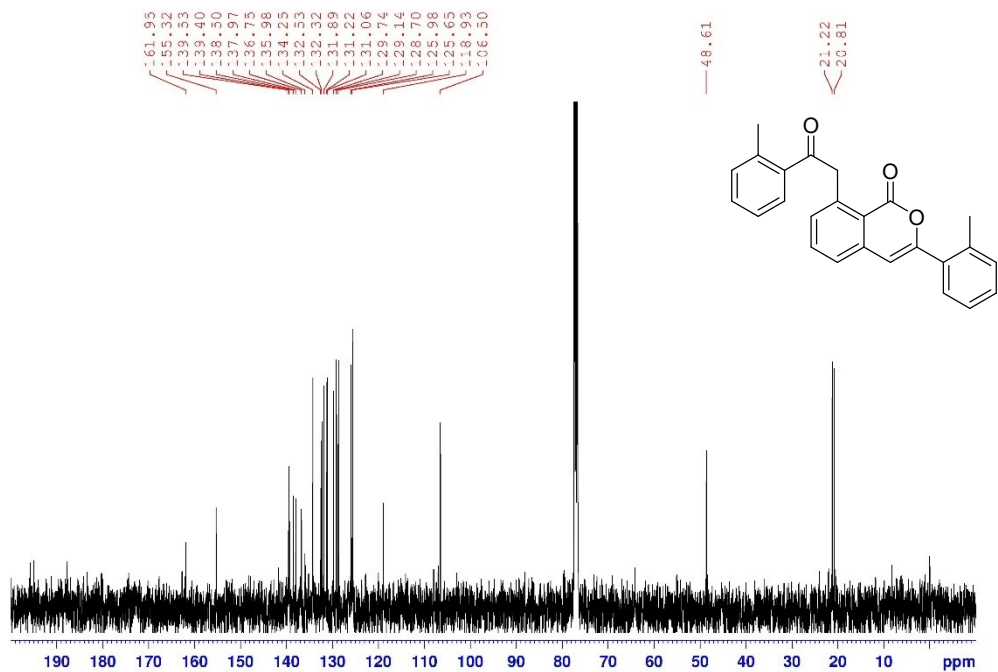

3aq, CDCl<sub>3</sub>, 400 MHz

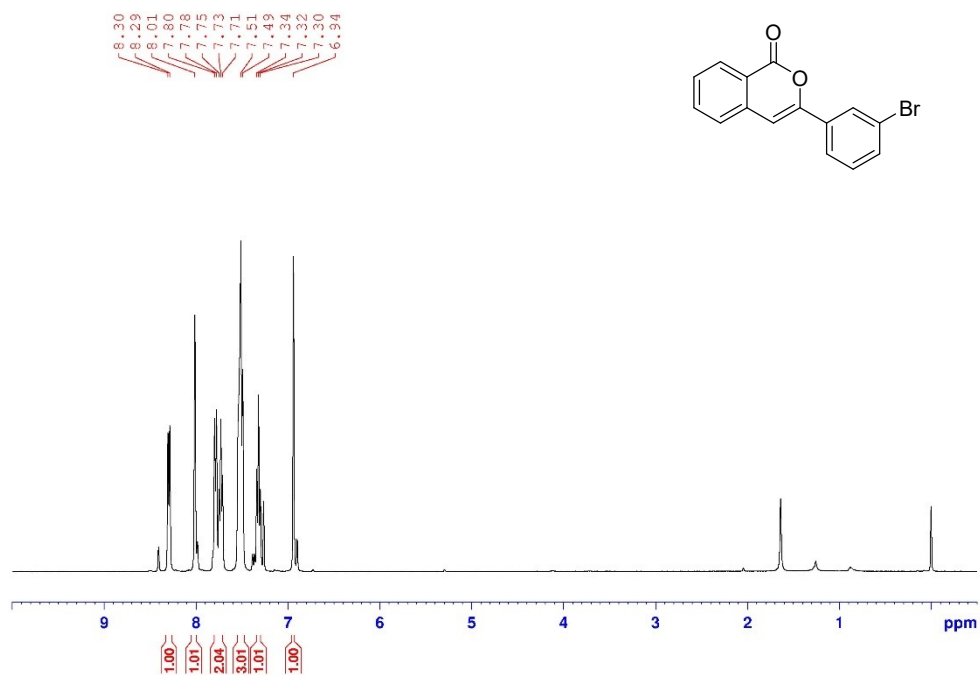

3aq, CDCl<sub>3</sub>, 150 MHz

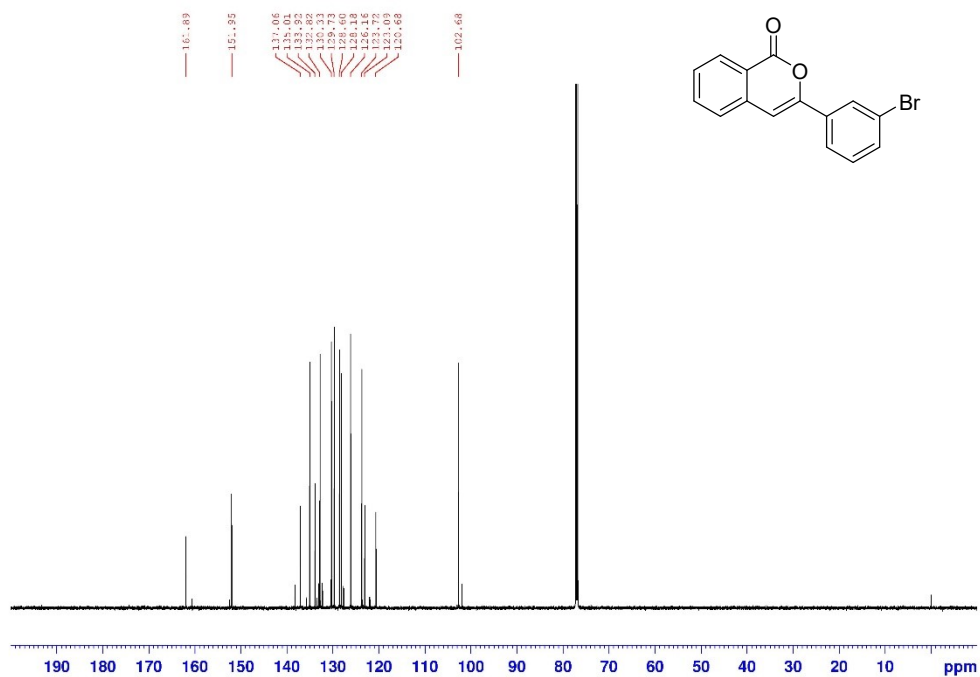

3aq', CDCl<sub>3</sub>, 400 MHz

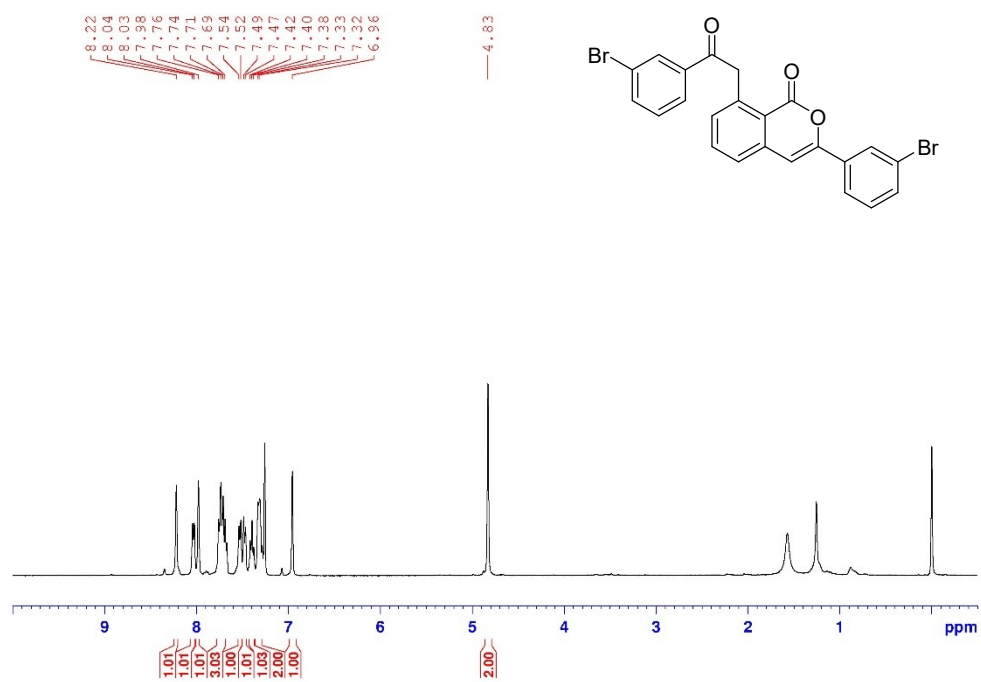

3aq', CDCl<sub>3</sub>, 100 MHz

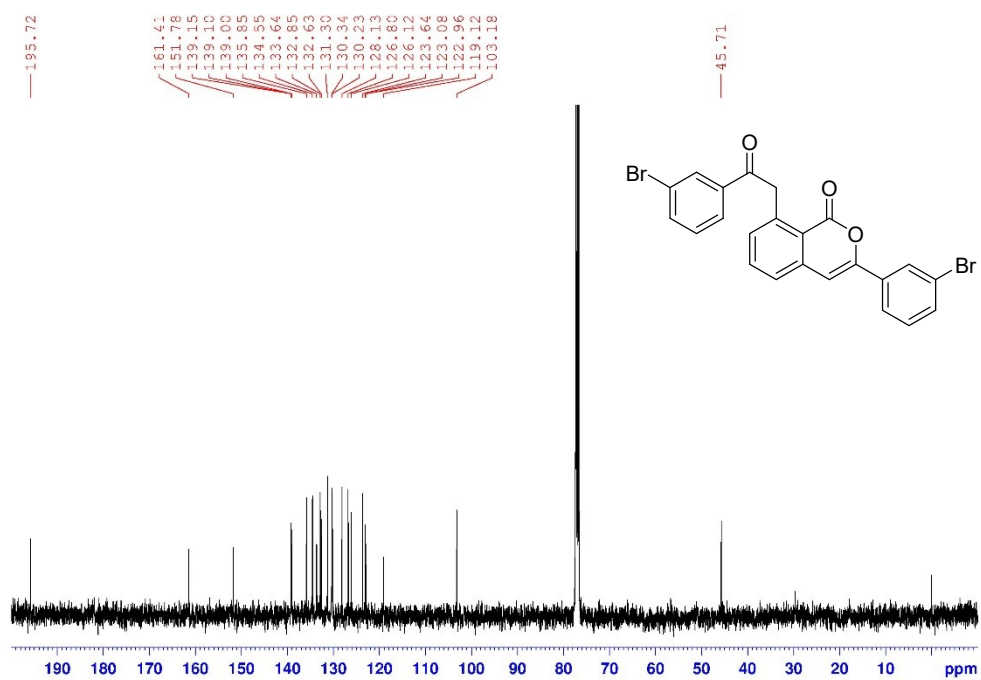

3ar, CDCl<sub>3</sub>, 400 MHz

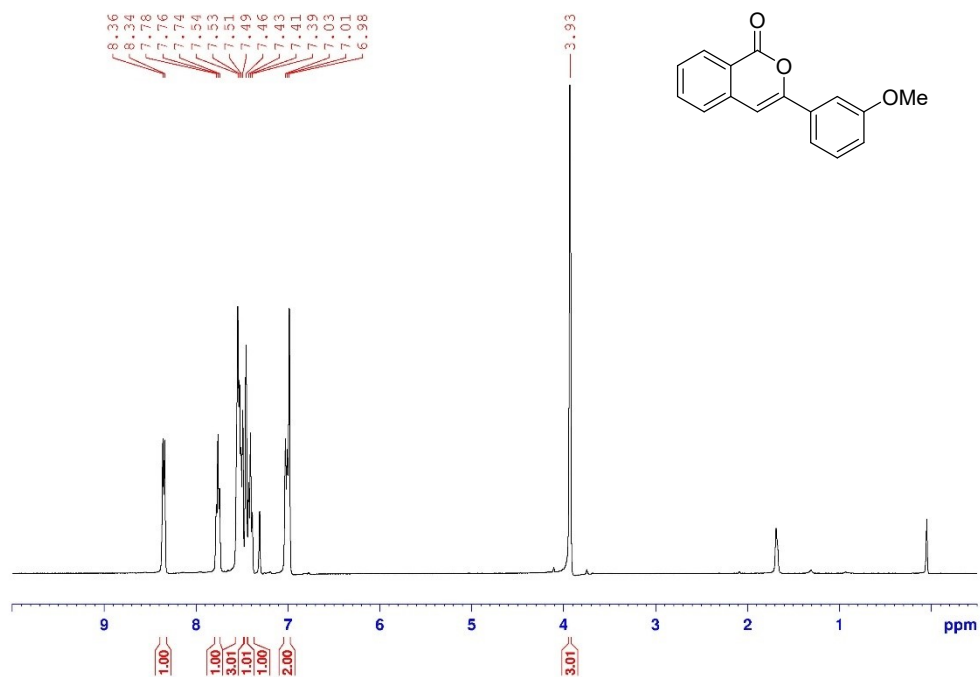

3ar, CDCl<sub>3</sub>, 100 MHz

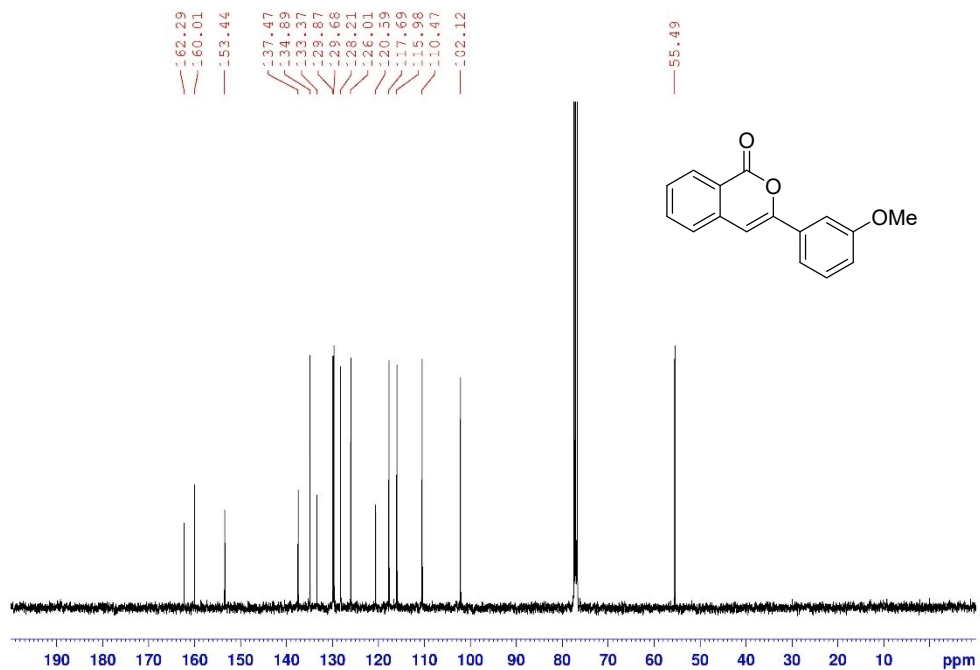

3ar', CDCl<sub>3</sub>, 400 MHz

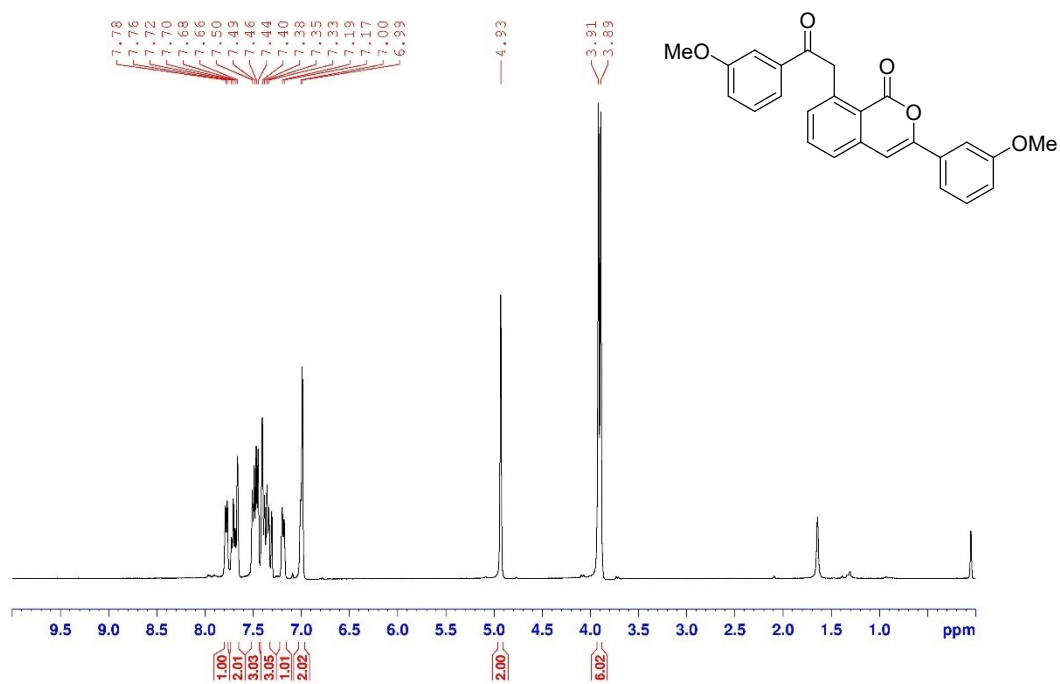

3ar', CDCl<sub>3</sub>, 100 MHz

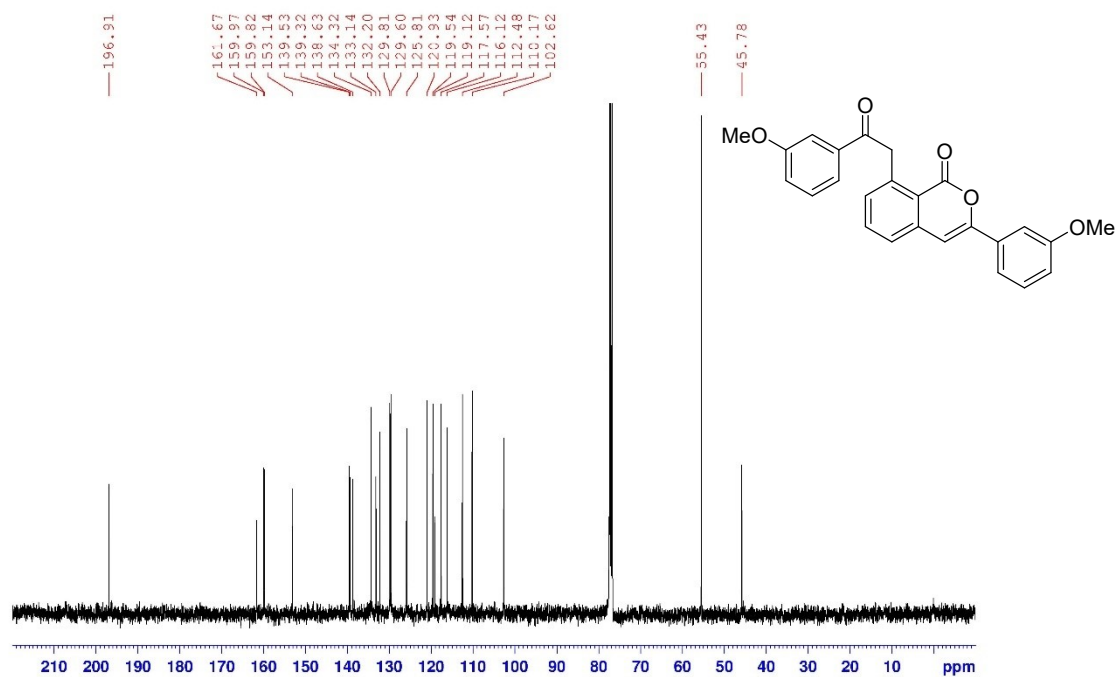

3as, CDCl<sub>3</sub>, 400 MHz

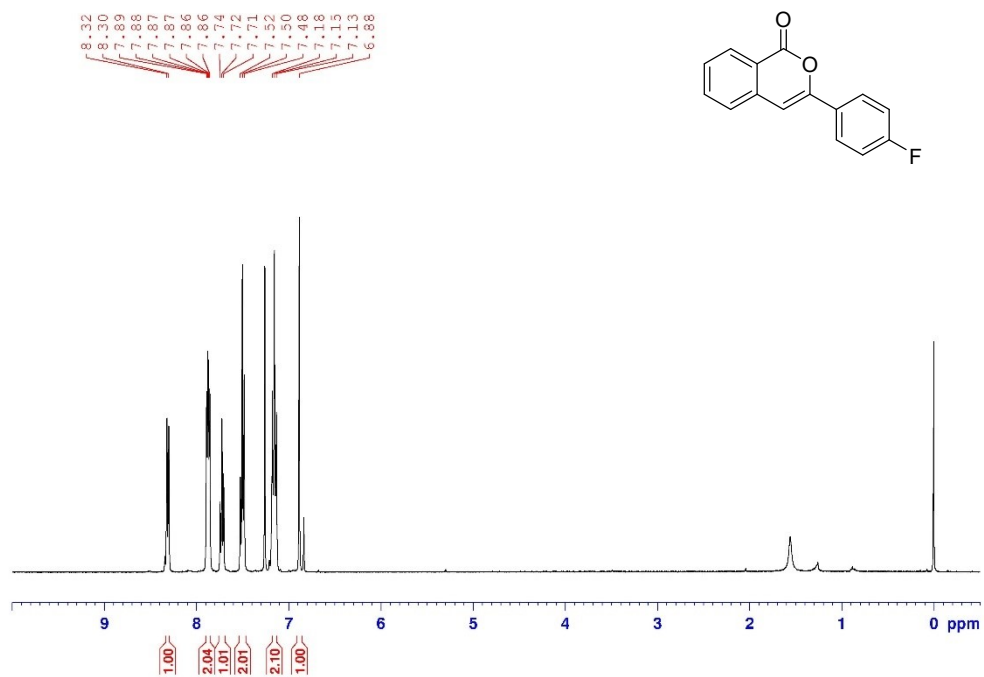

3as, CDCl<sub>3</sub>, 100 MHz

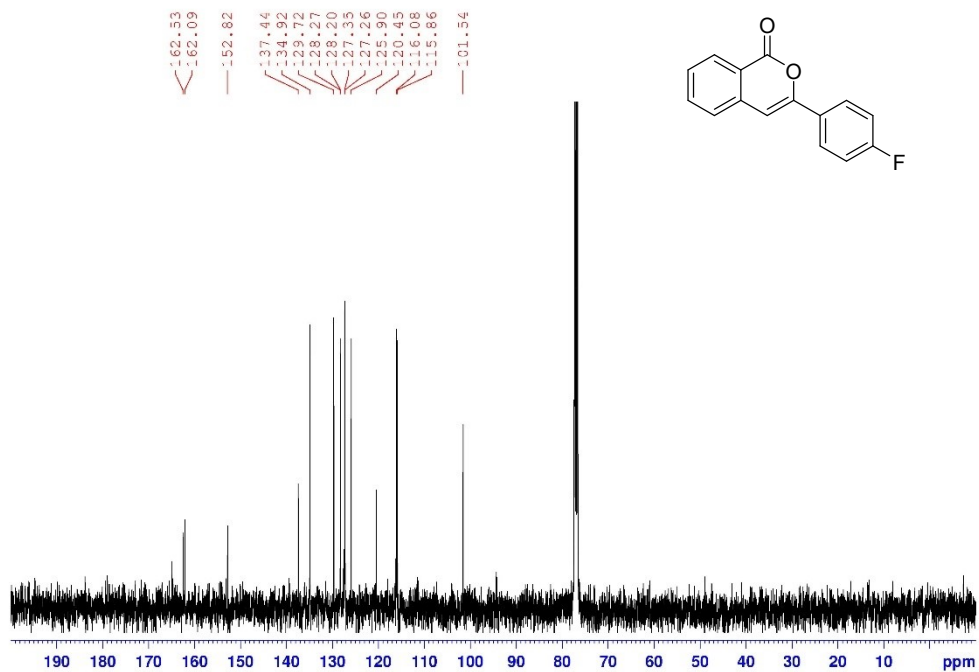

3as', CDCl<sub>3</sub>, 400 MHz

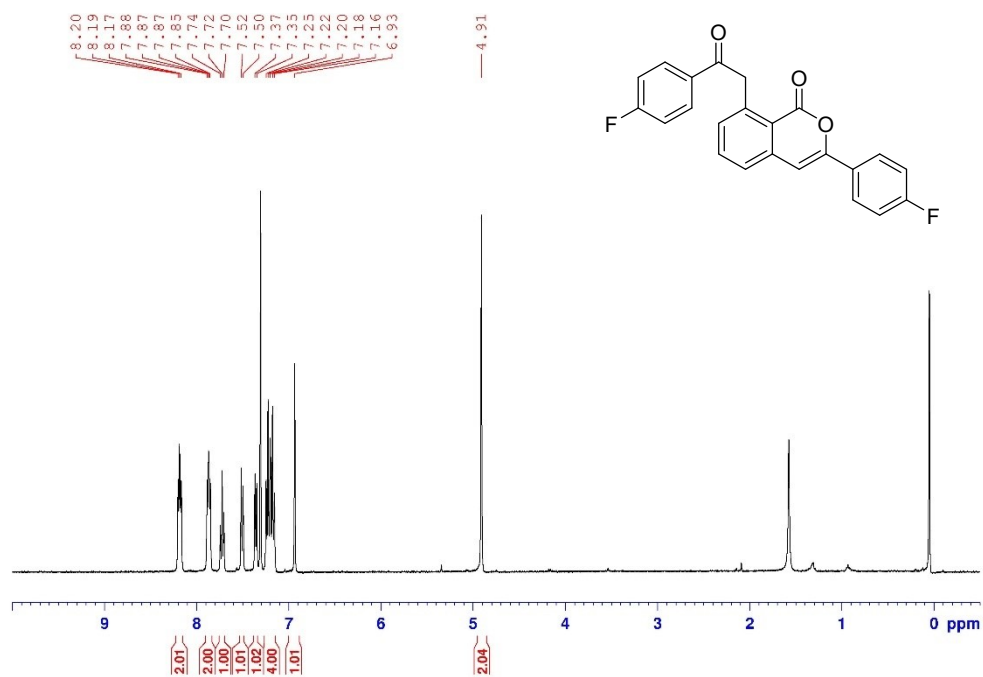

3as', CDCl<sub>3</sub>, 150 MHz

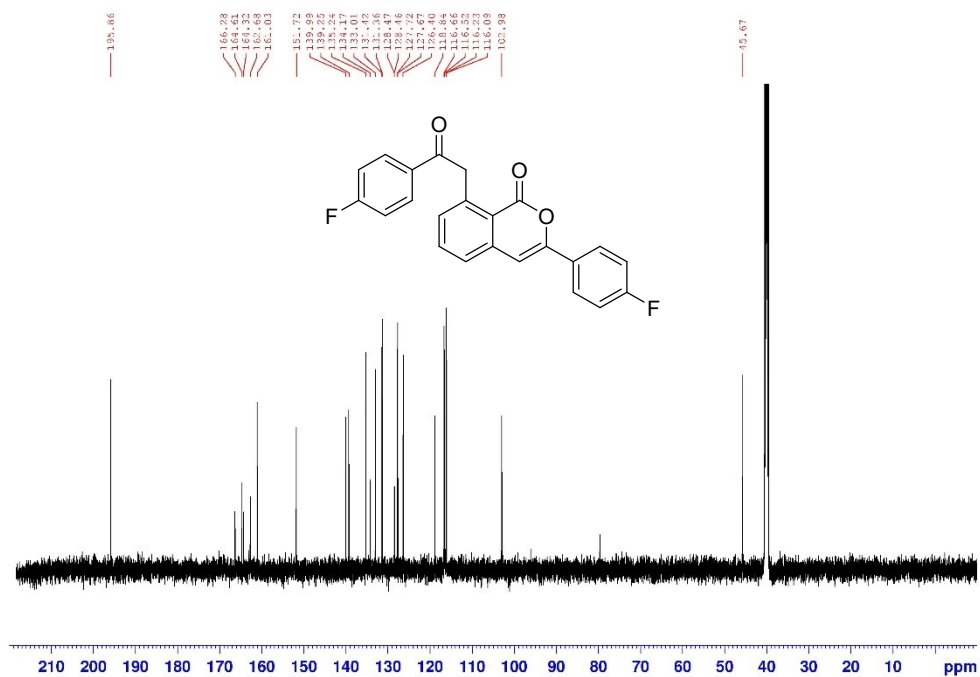

3at, CDCl<sub>3</sub>, 400 MHz

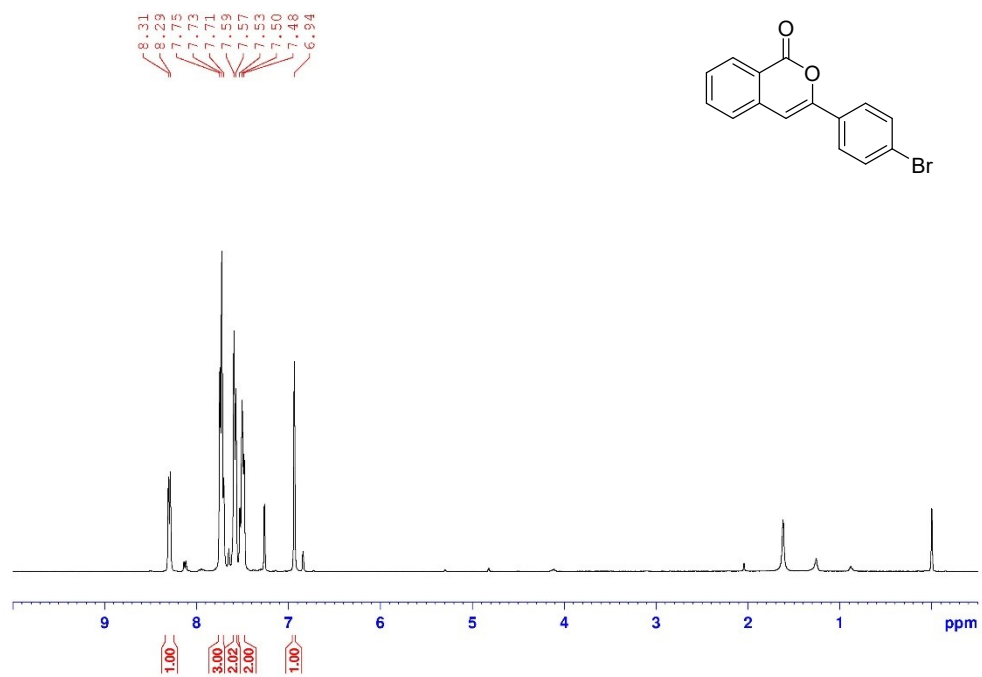

3at, CDCl<sub>3</sub>, 150 MHz

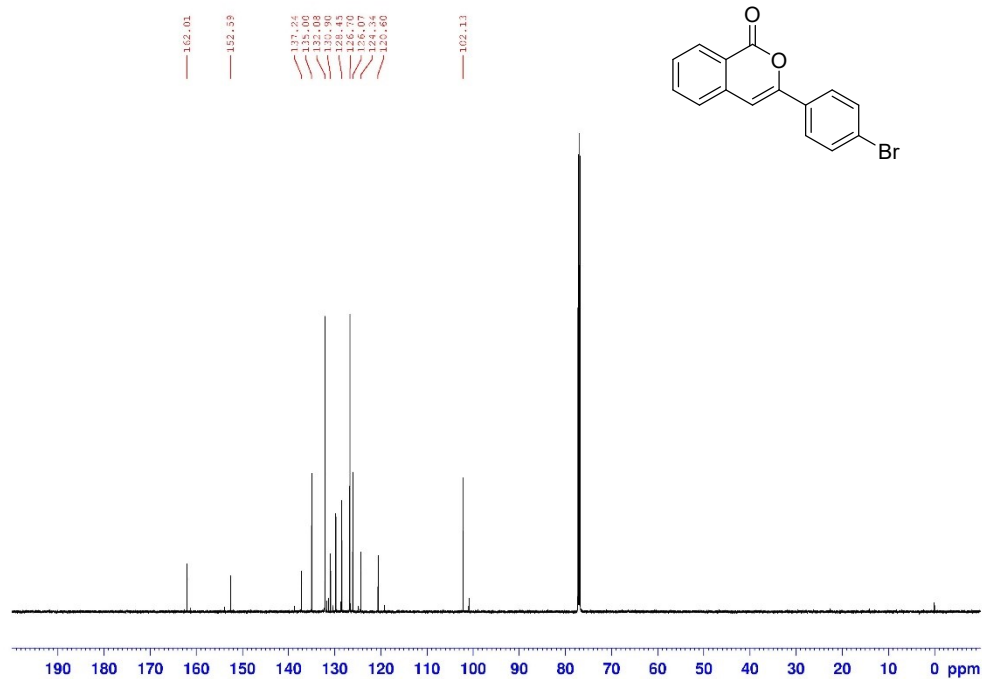



3at', CDCl<sub>3</sub>, 400 MHz

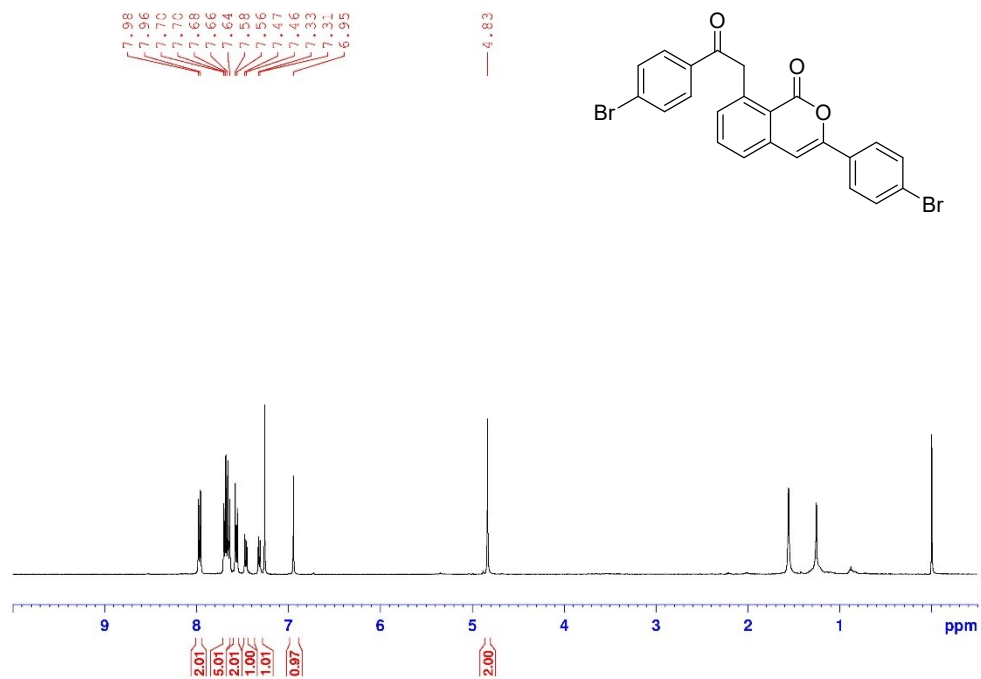

3at', CDCl<sub>3</sub>, 100 MHz

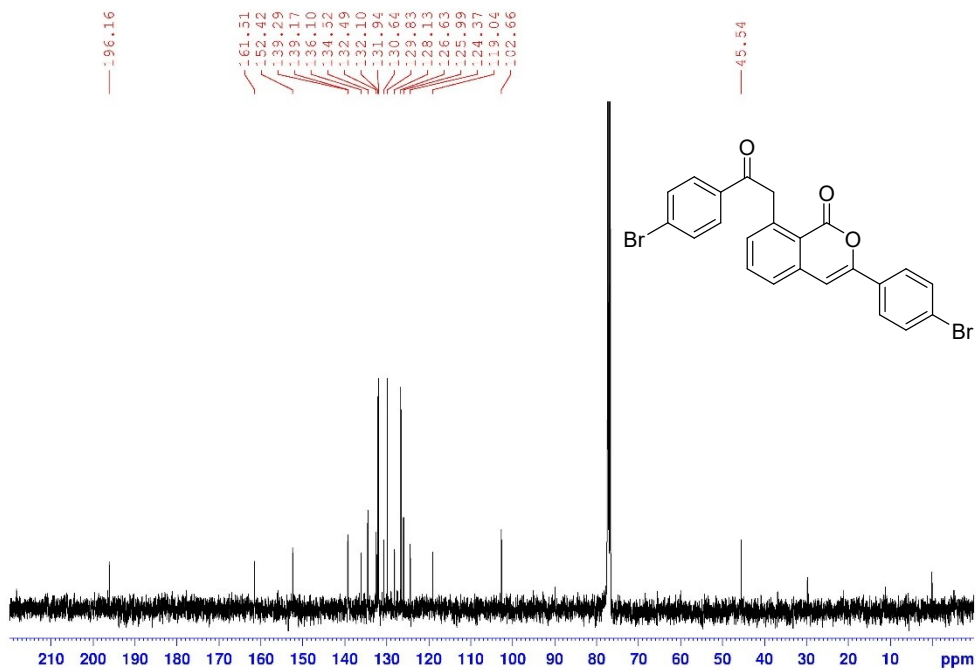

3au, CDCl<sub>3</sub>, 400 MHz

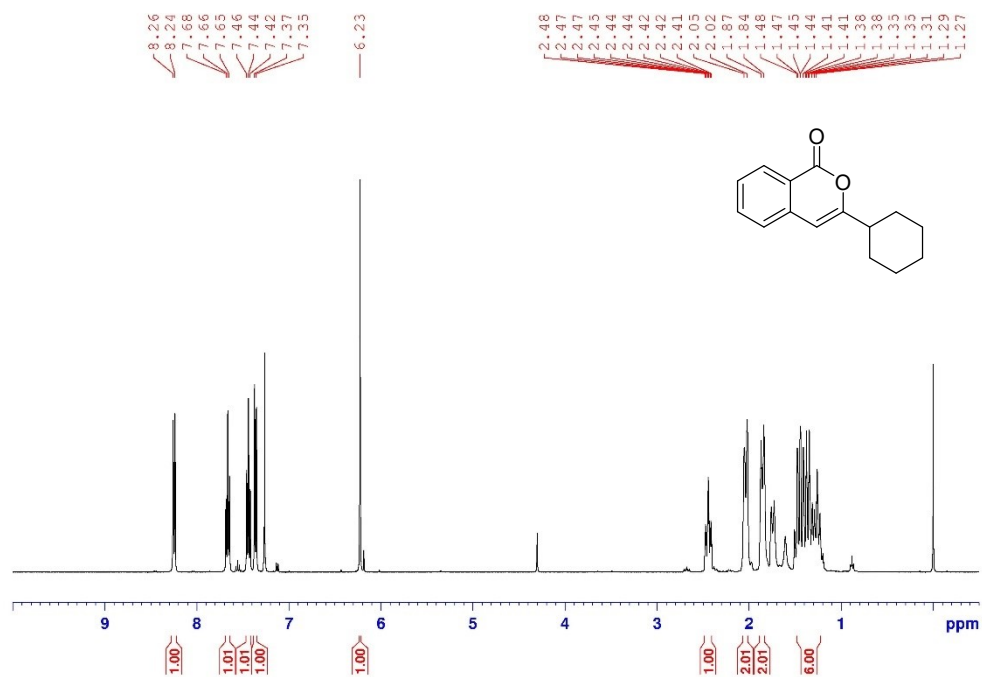

3au, CDCl<sub>3</sub>, 100 MHz

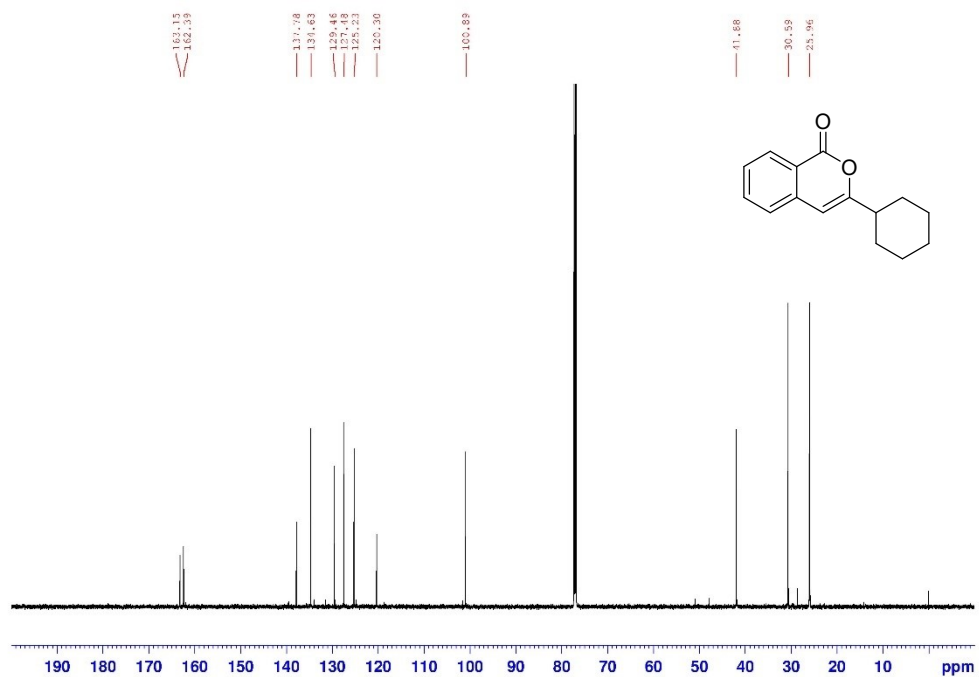

3au', CDCl<sub>3</sub>, 400 MHz

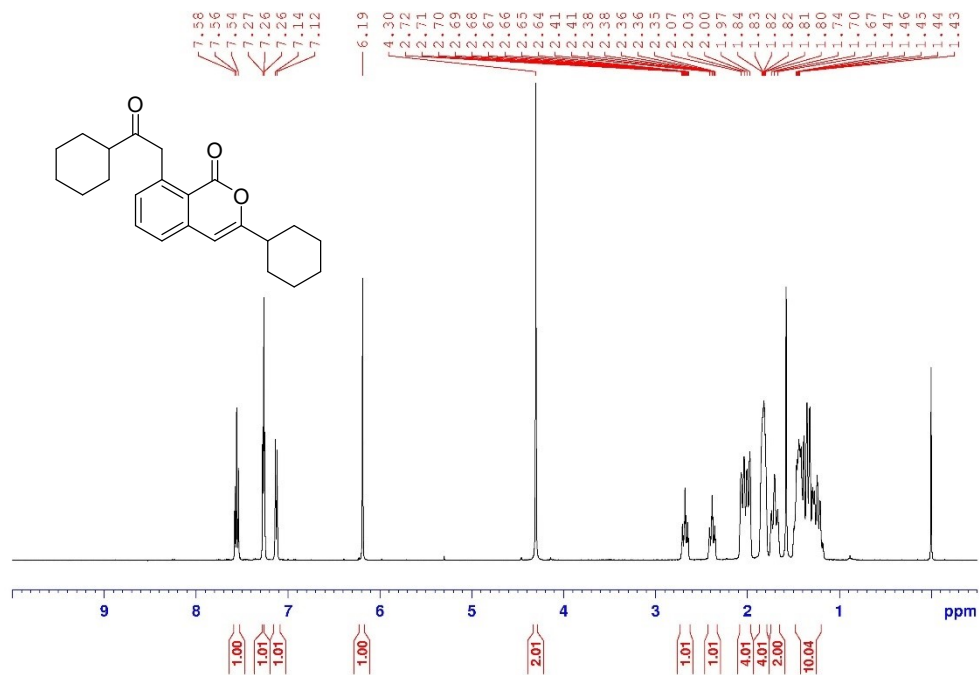

3au', CDCl<sub>3</sub>, 100 MHz

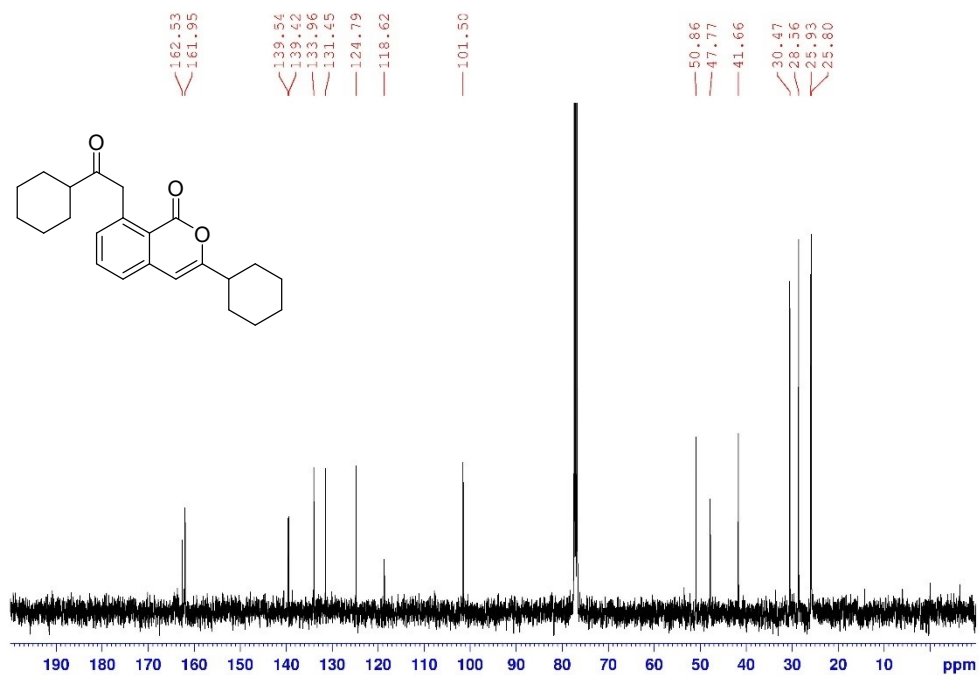

3av, CDCl<sub>3</sub>, 400 MHz

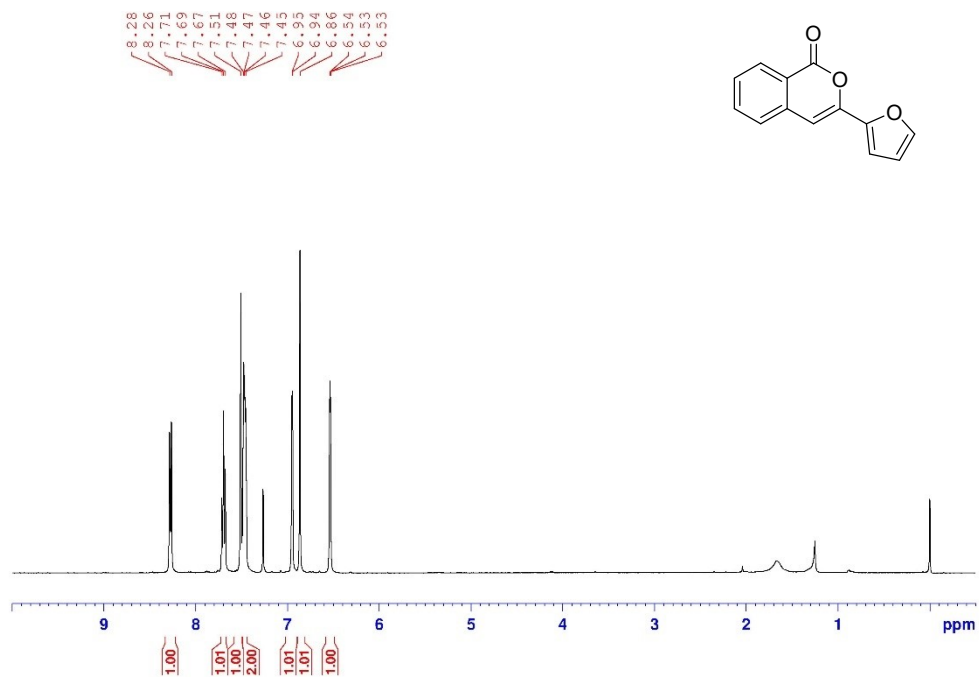

3av, CDCl<sub>3</sub>, 100 MHz

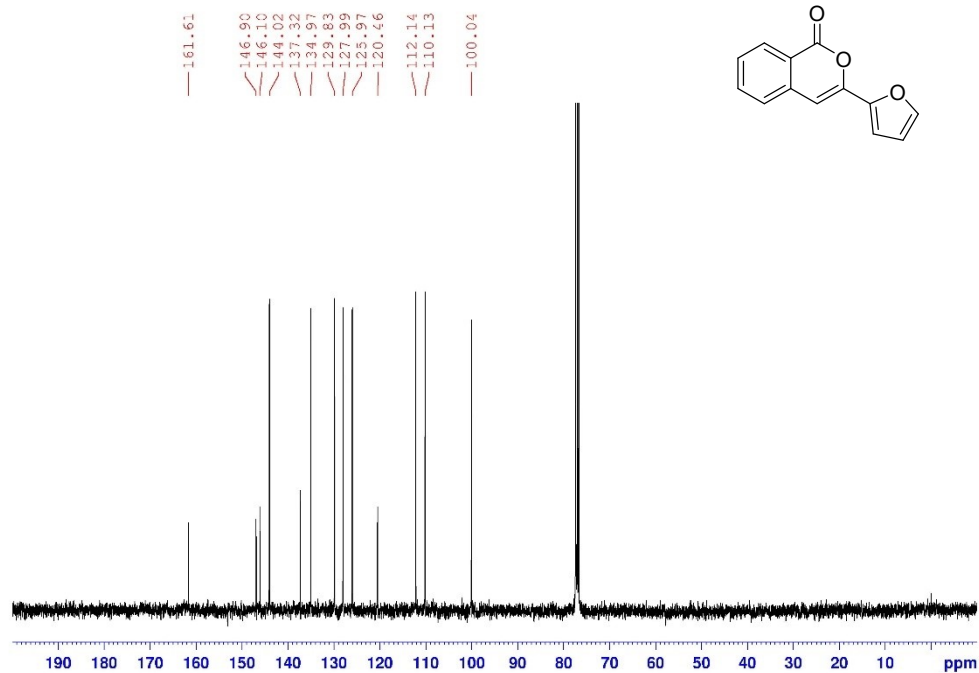

3av', CDCl<sub>3</sub>, 400 MHz

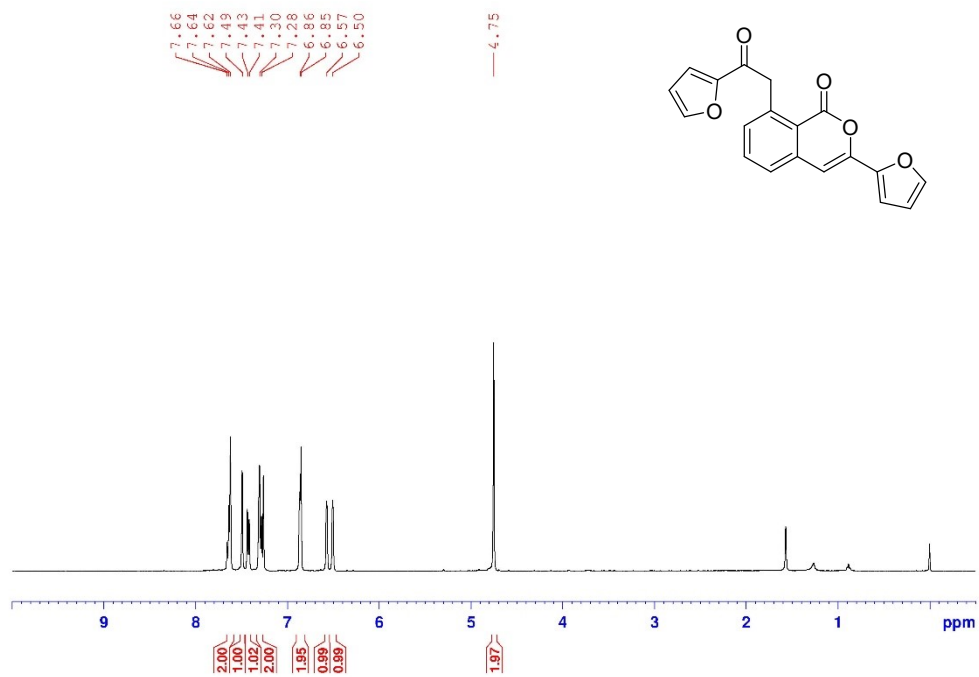

3av', CDCl<sub>3</sub>, 100 MHz

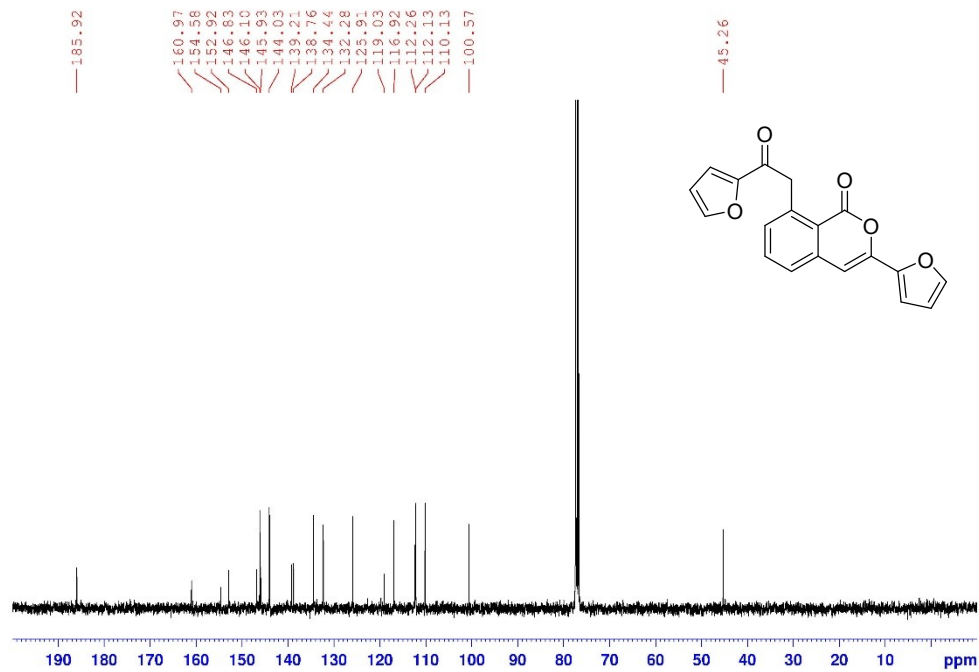

3dw, DMSO, 400MHz

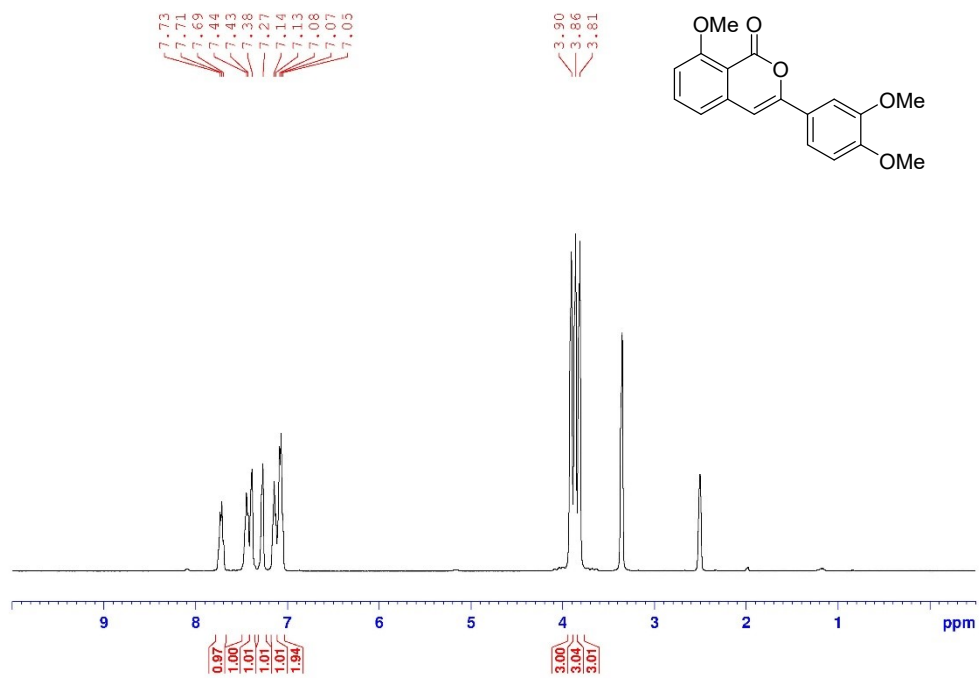

3dw, DMSO, 100MHz

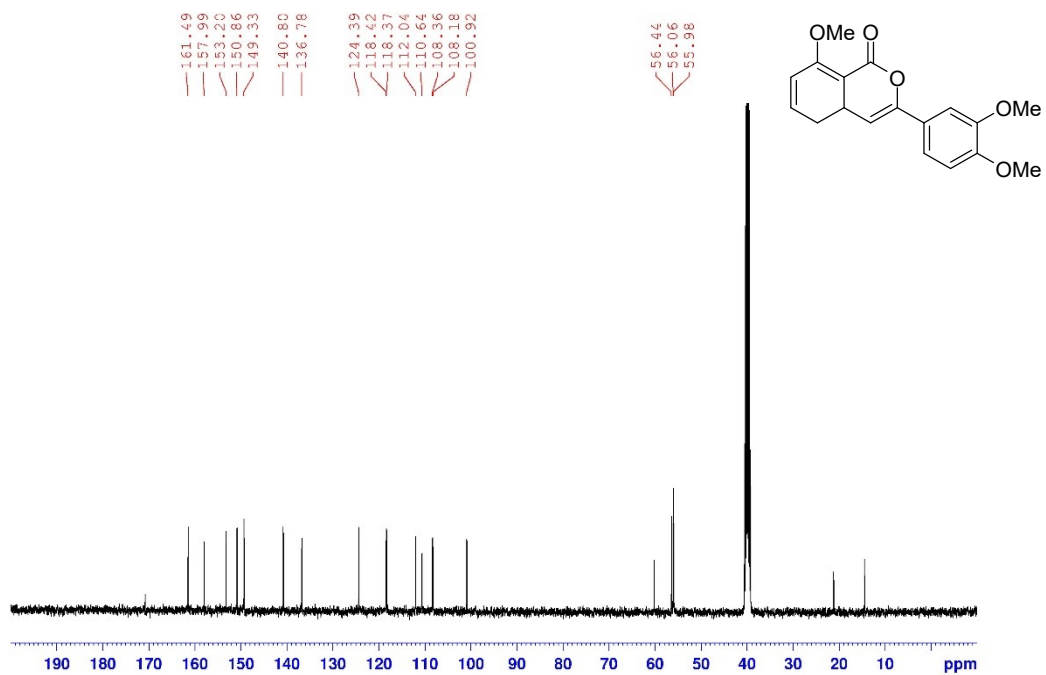

thunberginol A, DMSO-*d*<sub>6</sub>, 400MHz

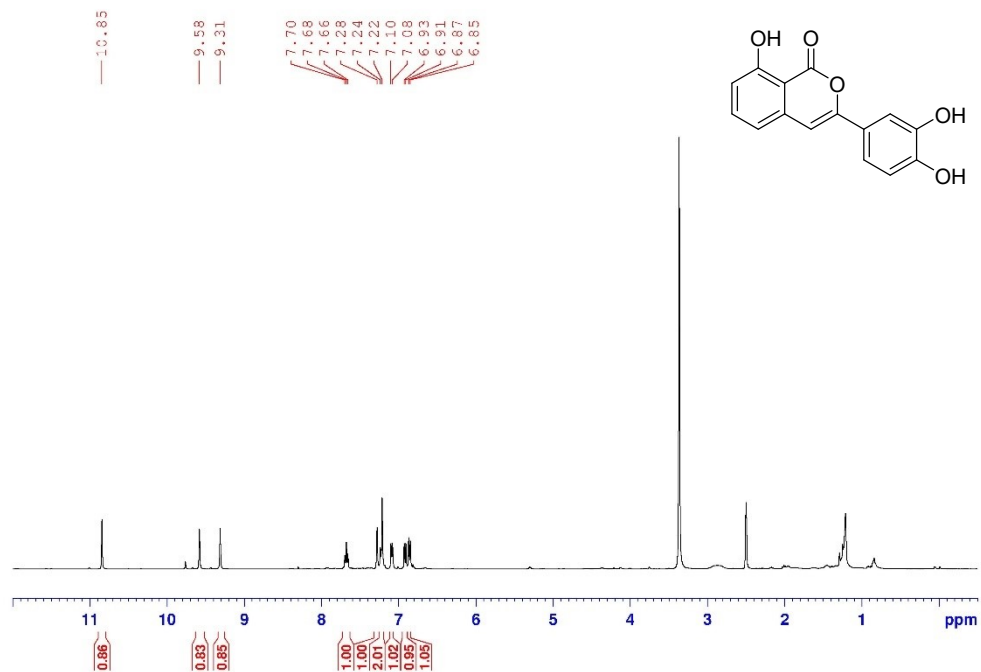

thunberginol A, DMSO-*d*<sub>6</sub>, 100MHz

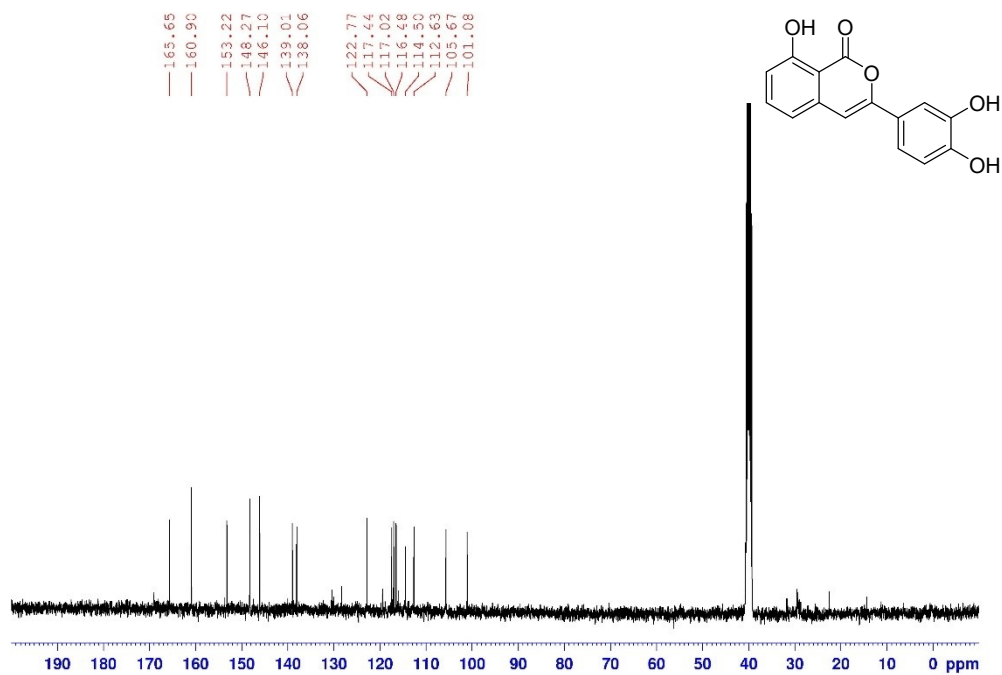

5, CDCl<sub>3</sub>, 400MHz

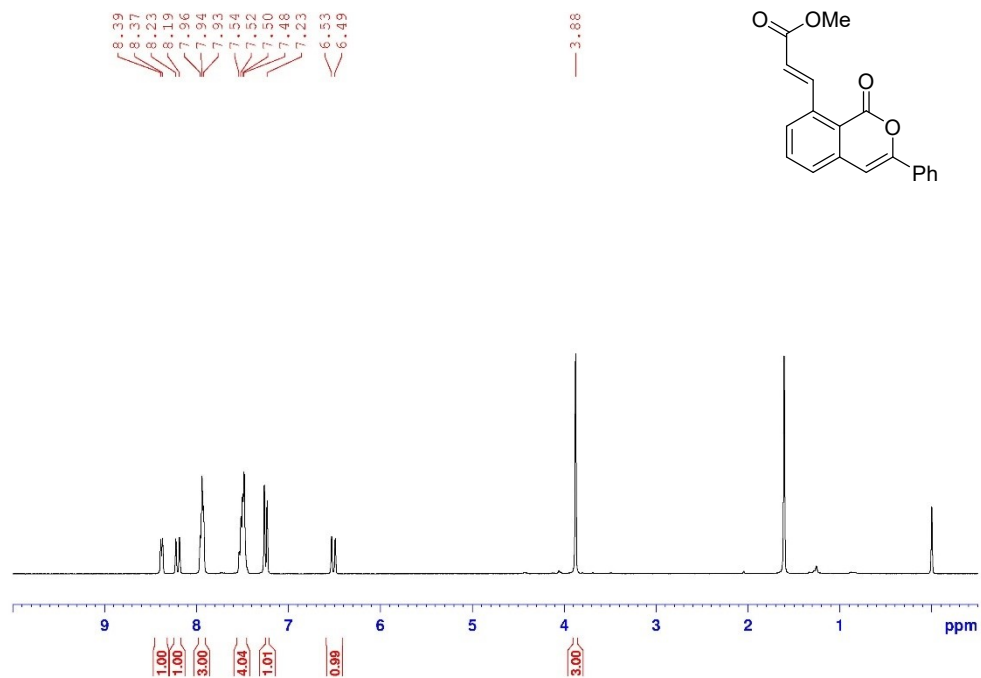

5, CDCl<sub>3</sub>, 100MHz

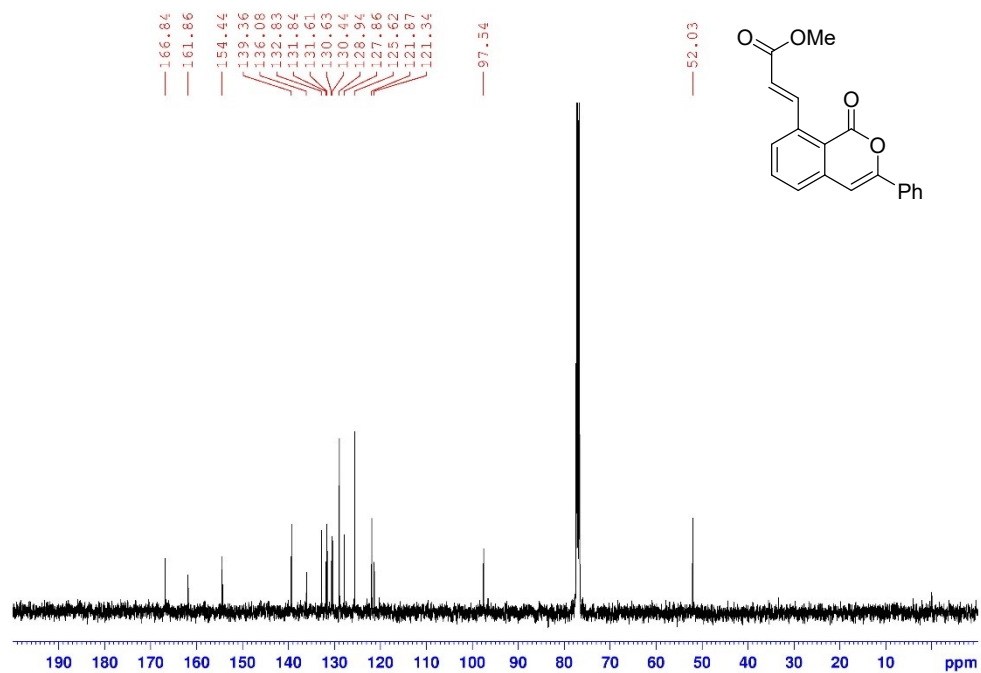

Supplement: d1ob02427b1.pdf [file d1ob02427b1.pdf]
